# Supplementary material for: Copper-catalyzed intermolecular carboesterification of unactivated aliphatic alkenes with α-carbonyl alkyl bromides via a SET process: efficient synthesis of γ-lactones
Source: Royal Society of Chemistry journal article supplement (doi:10.1039/d3qo00096f), 2023-01-01

## Supporting Information

### Copper-Catalyzed Intermolecular Carboesterification of Unactivated

### Aliphatic Alkenes with $\alpha$ -Carbonyl Alkyl Bromides via a SET

### Process: Efficient Synthesis of $\gamma$ -Lactones

Cancan Feng,<sup>†,‡</sup> Youcai Zhu,<sup>‡,§</sup> Zhen Liu,<sup>‡</sup> Fan Yang,<sup>\*,†</sup> and Yangjie Wu<sup>\*,†</sup>

<sup>†</sup>College of Chemistry, Green Catalysis Center, Henan Key Laboratory of Chemical Biology and Organic Chemistry, Key Laboratory of Applied Chemistry of Henan Universities, Zhengzhou University, Zhengzhou 450052, P.R. China

<sup>‡</sup>School of Chemical Engineering, East China University of Science and Technology, Shanghai 200237, P.R. China.

E-mail: yangf@zzu.edu.cn; wyj@zzu.edu.cn

#### Table of Contents

|                                                                                                   |    |
|---------------------------------------------------------------------------------------------------|----|
| <b>1. General Information</b> .....                                                               | 2  |
| <b>2. Optimization of Reaction Conditions</b> .....                                               | 2  |
| <b>3. Experimental Procedures</b> .....                                                           | 5  |
| <b>3.1 General Procedure for Synthesis of Alkene Substrates 1</b> .....                           | 5  |
| <b>3.1.1 General Procedure for <math>\alpha</math>-Substituted Vinyl Acetic Acids</b> .....       | 6  |
| <b>3.1.2 General Procedure for Substrates 1</b> .....                                             | 6  |
| <b>3.2 General Procedure for Synthesis of <math>\alpha</math>-Carbonyl Alkyl Bromides 2</b> ..... | 7  |
| <b>3.2.1 General Procedure for 2-Bromoisobutyl Esters</b> .....                                   | 7  |
| <b>3.2.2 General Procedure for <math>\alpha</math>-Carbonyl Alkyl Bromides 2</b> .....            | 7  |
| <b>3.3 General Procedure for Products 3</b> .....                                                 | 8  |
| <b>3.4 Gram-scale Experiment</b> .....                                                            | 8  |
| <b>3.5 The Experiment of Trapping the Radicals</b> .....                                          | 9  |
| <b>3.6 Isotopic Labelling Experiments</b> .....                                                   | 10 |
| <b>4. Computational details</b> .....                                                             | 11 |
| <b>5. Characterization Data of Products 3</b> .....                                               | 33 |
| <b>6. Removal of Directing Group &amp; Derivative Reaction of 3aa</b> .....                       | 44 |
| <b>7. The Single Crystal X-ray Diffraction Study</b> .....                                        | 46 |
| <b>8. References</b> .....                                                                        | 47 |
| <b>9. NMR and HRMS Spectra</b> .....                                                              | 50 |

## 1. General Information

Unless otherwise noted, all manipulations were carried out under an argon atmosphere, and all reagents were purchased from commercial suppliers without further purification. Dry MeCN was distilled over sodium hydride. Dry THF was distilled over sodium-benzophenone. All glassware and stirring bars were dried in an oven at 110 °C overnight unless otherwise stated.

Reactions were monitored by Thin Layer Chromatography (TLC) on plates (GF254) visualized by UV or stained with diazotization reagent and bromocresol green. The products were purified by column chromatography over silica gel (200-300 size).

NMR spectra were recorded on Bruker DPX-400 spectrometer ( $^1\text{H}$ : 400 MHz;  $^{13}\text{C}$ : 100 MHz;  $^{19}\text{F}$ : 376 MHz) and TMS was used as internal standard.  $^1\text{H}$ ,  $^{13}\text{C}$  and  $^{19}\text{F}$  multiplicities are reported as follows: s = singlet, d = doublet, t = triplet, q = quartet, dd = doublet of doublets, dt = doublet of triplet, td = triplet of doublets, m = multiplet, br = broad. Melting points were measured using a WC-1 microscopic apparatus and are uncorrected. High resolution mass spectra were ensured on an Agilent Technologies 1290-6540 UHPLC/Accurate-Mass Quadrupole Time-of-Flight LC/MS.

## 2. Optimization of Reaction Conditions

Table S1. Optimization of Solvent<sup>a</sup>

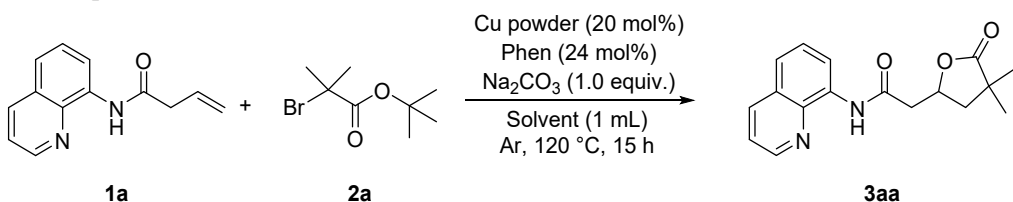

| Entry          | Solvent               | Yield (%) <sup>b</sup> |
|----------------|-----------------------|------------------------|
| 1              | DCE                   | 40                     |
| 2              | 1,4-Dioxane           | 66                     |
| 3              | THF                   | 61                     |
| 4              | t-AmylOH              | 44                     |
| 5              | Toluene               | 48                     |
| 6              | DMA                   | <5%                    |
| 7              | 1,4-Dioxane:THF (9:1) | 62                     |
| 8 <sup>c</sup> | MeCN                  | 48                     |

<sup>a</sup>Reaction conditions: **1a** (0.1 mmol), **2a** (2.0 equiv.), Cu powder (20 mol%), Phen (24 mol%), Na<sub>2</sub>CO<sub>3</sub> (1.0 equiv.) in Solvent (1.0 mL) at 120 °C under the argon atmosphere for 15 h. <sup>b</sup>Isolated yield. <sup>c</sup>MeCN (0.2 mL).

Table S2. Optimization of Ligand<sup>a</sup>

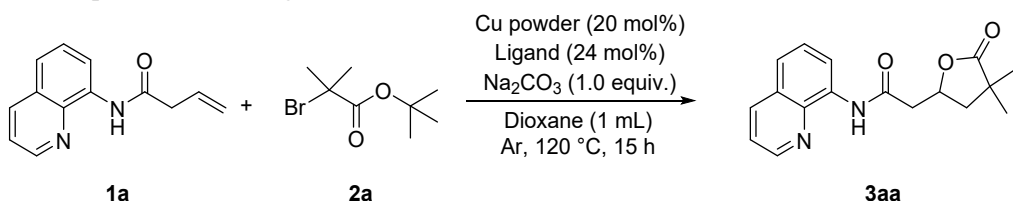

| Entry | Ligand             | Yield (%) <sup>b</sup> |
|-------|--------------------|------------------------|
| 1     | 2,9-dimethyl-1,10- | <5%                    |

|   | phenanthroline   |     |
|---|------------------|-----|
| 2 | Phen             | 66  |
| 3 | Dt bpy           | 78  |
| 4 | Bpy              | 82  |
| 5 | PPh <sub>3</sub> | 71  |
| 6 | DPPE             | <5% |

<sup>a</sup>Reaction conditions: **1a** (0.1 mmol), **2a** (2.0 equiv.), Cu powder (20 mol%), Ligand (24 mol%), Na<sub>2</sub>CO<sub>3</sub> (1.0 equiv.) in 1,4-Dioxane (1.0 mL) at 120 °C under the argon atmosphere for 15 h. <sup>b</sup>Isolated yield.

Table S3. Optimization of Base<sup>a</sup>

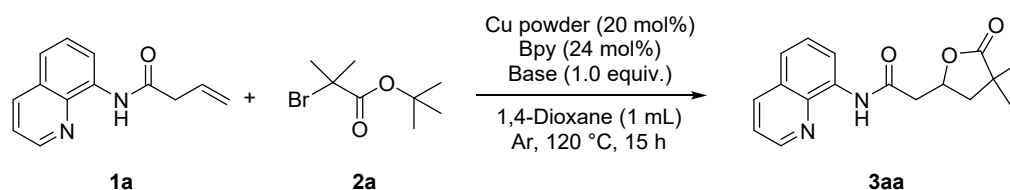

| Entry | Base                            | Yield (%) <sup>b</sup> |
|-------|---------------------------------|------------------------|
| 1     | Na <sub>2</sub> CO <sub>3</sub> | 82                     |
| 2     | K <sub>2</sub> CO <sub>3</sub>  | 19                     |
| 3     | Cs <sub>2</sub> CO <sub>3</sub> | <5%                    |
| 4     | NaOAc                           | 39                     |
| 5     | <sup>t</sup> BuONa              | <5%                    |
| 6     | K <sub>3</sub> PO <sub>4</sub>  | 53                     |
| 7     | K <sub>2</sub> HPO <sub>4</sub> | 46                     |

<sup>a</sup>Reaction conditions: **1a** (0.1 mmol), **2a** (2.0 equiv.), Cu powder (20 mol%), Bpy (24 mol%), Base (1.0 equiv.) in 1,4-Dioxane (1.0 mL) at 120 °C under the argon atmosphere for 15 h. <sup>b</sup>Isolated yield.

Table S4. Optimization of Catalyst<sup>a</sup>

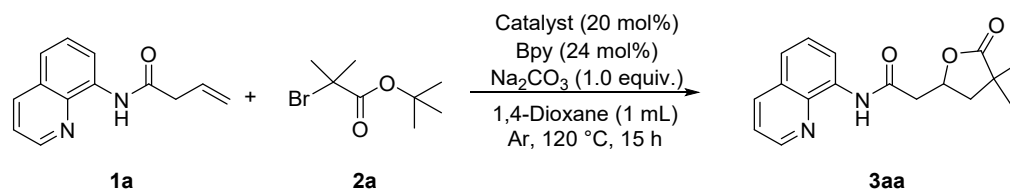

| Entry           | Catalyst                            | Yield (%) <sup>b</sup> |
|-----------------|-------------------------------------|------------------------|
| 1               | Cu(OTf) <sub>2</sub>                | 73                     |
| 2               | CuF <sub>2</sub> ·2H <sub>2</sub> O | 67                     |
| 3               | CuBr <sub>2</sub>                   | 78                     |
| 4               | CuI                                 | 76                     |
| 5               | CuCl                                | 69                     |
| 6               | CuSCN                               | 76                     |
| 7               | CuOAc                               | 74                     |
| 8               | CuBr                                | 79                     |
| 9               | Cu powder                           | 82                     |
| 10 <sup>c</sup> | Cu powder                           | 77                     |

<sup>a</sup>Reaction conditions: **1a** (0.1 mmol), **2a** (2.0 equiv.), Catalyst (20 mol%), Bpy (24 mol%), Na<sub>2</sub>CO<sub>3</sub> (1.0 equiv.)

in 1,4-Dioxane (1.0 mL) at 120 °C under the argon atmosphere for 15 h. <sup>b</sup>Isolated yield. <sup>c</sup>Cu powder (20 mol%), Bpy (20 mol%).

Table S5. Control Experiment<sup>a</sup>

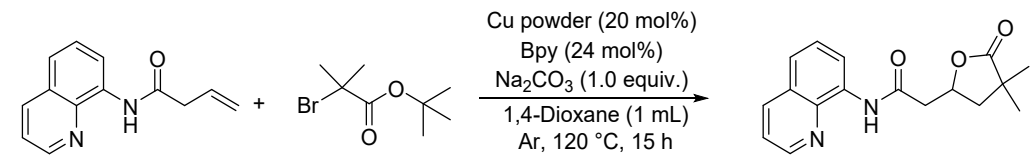

| Entry | Yield (%) <sup>b</sup>                  |
|-------|-----------------------------------------|
| 1     | standard                                |
| 2     | Without Cu powder                       |
| 3     | Without Bpy                             |
| 4     | Without Na <sub>2</sub> CO <sub>3</sub> |
| 5     | With 0.1 mL H <sub>2</sub> O            |
| 6     | In air instead of Ar                    |
| 7     | In O <sub>2</sub> instead of Ar         |

<sup>a</sup>Reaction conditions: **1a** (0.1 mmol), **2a** (2.0 equiv.), Cu powder (20 mol%), Bpy (24 mol%), Na<sub>2</sub>CO<sub>3</sub> (1.0 equiv.) in 1,4-Dioxane (1.0 mL) at 120 °C under the argon atmosphere for 15 h. <sup>b</sup>Isolated yield.

Table S6. Optimization of Time<sup>a</sup>

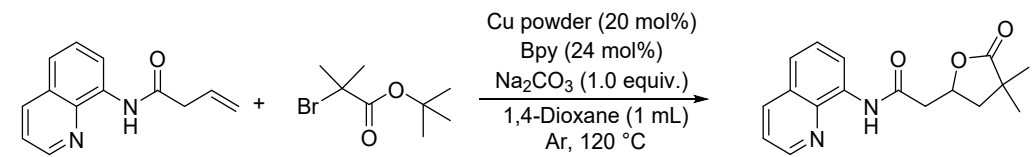

| Entry                | Time/h   | Yield (%) <sup>b</sup> |
|----------------------|----------|------------------------|
| 1                    | 4        | 74                     |
| 2                    | 5        | 74                     |
| 3                    | 8        | 80                     |
| 4                    | 12       | 81                     |
| <b>5<sup>c</sup></b> | <b>8</b> | <b>81</b>              |

<sup>a</sup>Reaction conditions: **1a** (0.1 mmol), **2a** (2.0 equiv.), Cu powder (20 mol%), Bpy (24 mol%), Na<sub>2</sub>CO<sub>3</sub> (1.0 equiv.) in 1,4-Dioxane (1.0 mL) at 120 °C under the argon atmosphere for 15 h. NR = no reaction. <sup>b</sup>Isolated yield. <sup>c</sup>Cu powder (10 mol%), Bpy (12 mol%).

Table S7. Unsuccessful Examples of Unactivated Alkenes<sup>a,b</sup>

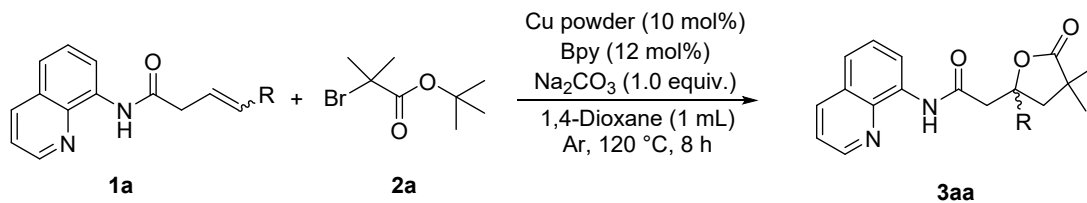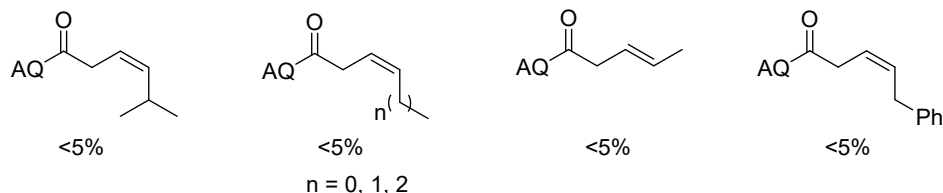

<sup>a</sup>Reaction conditions: **1a** (0.1 mmol), **2a** (2.0 equiv.), Cu powder (10 mol %), Bpy (12 mol%), Na<sub>2</sub>CO<sub>3</sub> (1.0 equiv.) in 1,4-Dioxane (1.0 mL) at 120 °C under the argon atmosphere for 8 h. <sup>b</sup>Isolated yield.

Table S8. Screen of Directing Group<sup>a</sup>

**1a** + **2a**  $\xrightarrow[\text{Ar, 120 } ^\circ\text{C, 8 h}]{\text{Cu powder (10 mol\%), Ligand (12 mol\%), Na}_2\text{CO}_3 \text{ (1.0 equiv.)}, \text{1,4-Dioxane (1 mL)}}$  **3aa**

| Entry | Ligand              | Yield (%) <sup>b</sup> |
|-------|---------------------|------------------------|
| 1     | 8-Aminoquinoline    |                        |
|       | DG=<br><b>A</b> 20% |                        |
|       | <br><b>B</b> 26%    |                        |

<sup>a</sup>Reaction conditions: **1a** (0.1 mmol), **2a** (2.0 equiv.), Cu powder (10 mol%), 8-Aminoquinoline (12 mol%), Na<sub>2</sub>CO<sub>3</sub> (1.0 equiv.) in 1,4-Dioxane (1.0 mL) at 120 °C under the argon atmosphere for 8 h. <sup>b</sup>Isolated yield.

### 3. Experimental Procedure

#### 3.1 General Procedure for Synthesis of Alkene Substrates 1

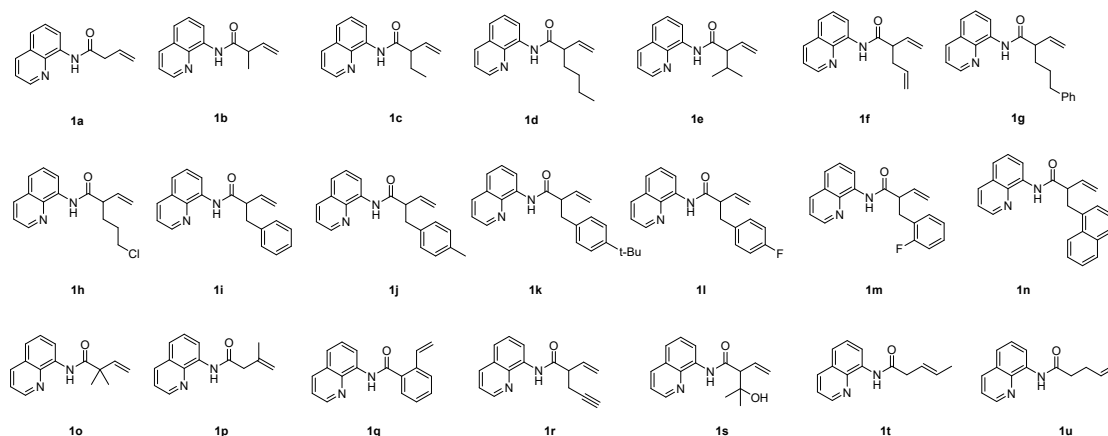

Alkene substrates **1a**<sup>1</sup>, **1b**<sup>2</sup>, **1c-1n**<sup>3</sup>, **1o**<sup>1</sup>, **1p**<sup>4</sup>, **1q**<sup>5</sup>, **1r**<sup>3</sup>, **1s**<sup>6</sup>, **1t**<sup>7</sup>, **1u**<sup>1</sup> were prepared according to the reported procedures.

### 3.1.1 General Procedure for $\alpha$ -Substituted Vinyl Acetic Acids

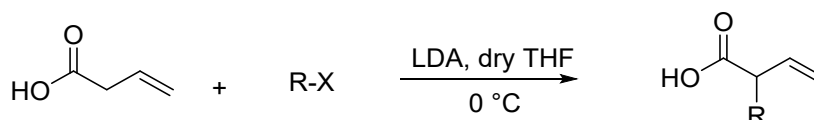

A solution of LDA (6.6 mL, 13.2 mmol, 2.0 M in THF, 2.2 equiv.) in dry THF (8 mL) was added to a solution of vinyl acetic acid (6 mmol, 1.0 equiv.) in dry THF (3 mL) dropwise at 0 °C, and the resulting solution was stirred for 45 min. Then an alkylating agent (1.14 mL, 10 mmol, 1.0 equiv.) was added slowly at 0 °C and then the mixture was stirred for 30 min. After that, the resulting mixture was stirred for 3 h at room temperature, and water was added to the mixture. The mixture was acidified with 1M hydrochloric acid until pH = 2~3. The milky solution was then extracted with EtOAc (3 × 40 mL). The combined organic layers were dried by anhydrous Na<sub>2</sub>SO<sub>4</sub>, filtered and concentrated under reduced pressure. Analysis of the crude <sup>1</sup>H NMR spectrum revealed the amount of the desired acid. The combined organic layers were carried forward to the next step without further purification.

### 3.1.2 General Procedure for Substrates 1

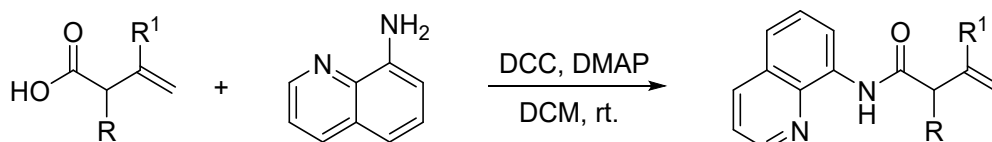

A 100 mL two-necked round-bottom flask was equipped with a magnetic stir bar and charged with corresponding vinyl acetic acid (1.12 mL, 13 mmol), 8-aminoquinoline (1.44 g, 10 mmol), DMAP (0.1 equiv., 1.3 mmol) in 30 mL anhydrous CH<sub>2</sub>Cl<sub>2</sub> at 0 °C. After DCC (1.1 equiv., 13 mmol) in CH<sub>2</sub>Cl<sub>2</sub> (20 mL) was added dropwise to the solution, the reaction was then warmed to room temperature and stirred for 16 h. The deep brown solution was diluted with EtOAc (80 mL),

and washed with sat.  $\text{NaHCO}_3$  ( $2 \times 70$  mL) and brine ( $1 \times 70$  mL). The combined organic solvent was dried over  $\text{Na}_2\text{SO}_4$ , filtered and concentrated under reduced pressure. The resulting residue was purified by column chromatography (hexane/ethyl acetate = 15:1) (V/V) to afford the target product.

### 3.2 General Procedure for the Synthesis of $\alpha$ -Carbonyl Alkyl Bromides 2

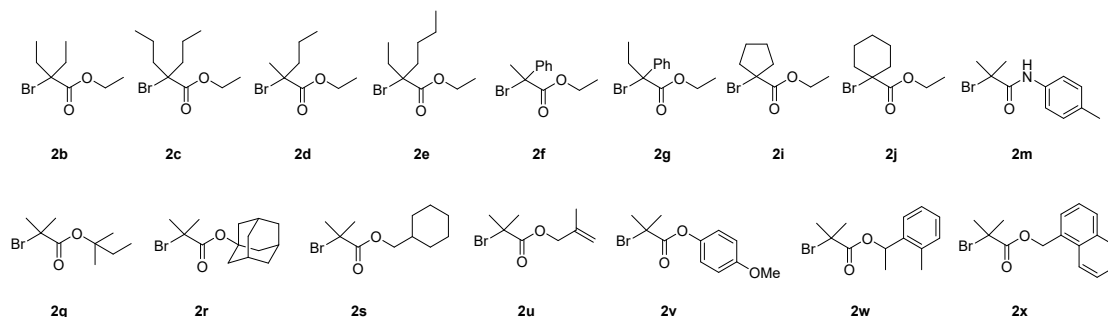

Substrates **2b-2j**<sup>8</sup>, **2m-2x**<sup>9</sup> were prepared according to the corresponding literature methods.

#### 3.2.1 General Procedure for 2-Bromoisobutyl Esters

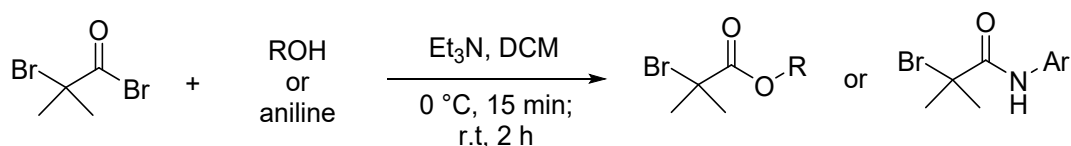

A 50 mL two-necked round-bottom flask was equipped with a magnetic stir bar and charged with corresponding alcohol or aniline (10 mmol, 1.0 equiv.) and triethylamine (10 mmol, 1.0 equiv.) in 15 mL anhydrous  $\text{CH}_2\text{Cl}_2$  at 0 °C for 5-10 min. Subsequently, 2-bromoisobutyryl bromide (10 mmol, 1.0 equiv.) was added dropwise over 15 min to a stirred cooled solution. Upon completion, the reaction was stirred at 0 °C for 30 min, followed by stirring at room temperature for an additional 2 h. The reaction mixture was then transferred into a separatory funnel and washed with 0.1 M HCl ( $2 \times 50$  mL), saturated  $\text{NaHCO}_3$  ( $1 \times 50$  mL), and brine ( $1 \times 50$  mL), and the combined organic solvent was dried over  $\text{Na}_2\text{SO}_4$ , filtered and concentrated under reduced pressure. The resulting residue was purified by column chromatography (hexane/ethyl acetate = 30:1) (V/V) to afford the target product.

#### 3.2.2 General Procedure for $\alpha$ -Carbonyl Alkyl Bromides

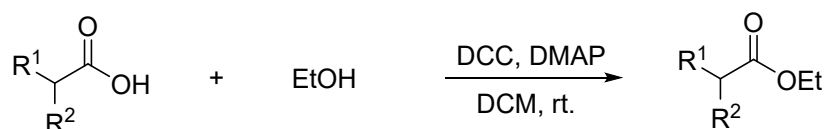

A 100 mL two-necked round-bottom flask was equipped with a magnetic stir bar and charged with carboxylic acid (15 mmol, 1.0 equiv.), ethanol (25.5 mmol, 1.7 equiv.), DMAP (0.45 mmol, 0.03 equiv.) dissolved in 30 mL anhydrous DCM at 0 °C. After DCC (19.5 mmol, 1.3 equiv.) in DCM (20 mL) was added dropwise to the solution, the reaction was then warmed to room temperature, and stirred overnight. After the removal of solvent (DCM) by evaporation, the resulting

mixture was extracted with EtOAc (3 × 30 mL). The combined organic layers were washed with brine (2 × 30 mL) and dried over Na<sub>2</sub>SO<sub>4</sub>, filtered and concentrated under reduced pressure. The resulting residue was purified by column chromatography (hexane/ethyl acetate = 30/1) (V/V) to give the ester product.

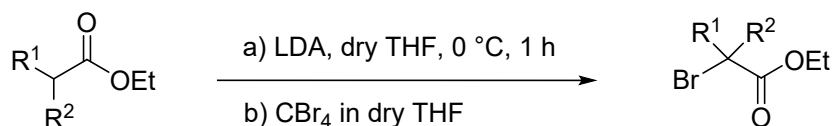

Under argon atmosphere, a 25 mL two-necked round-bottom flask was equipped with a magnetic stir bar and a rubber septum, and charged with LDA (5.5 mL, 5.5 mmol, 1.1 equiv.) in dry THF (8 mL) at 0 °C. The corresponding ester starting material (5 mmol, 1.0 equiv.) was added dropwise to the reaction and the reaction was further stirred for 1 h. Then a solution of CBr<sub>4</sub> (1.0 equiv.) in THF (3 mL) was added to the reaction slowly. Until the ester starting material was consumed, the reaction mixture was quenched with aq. NH<sub>4</sub>Cl solution (10 mL) and extracted with DCM (3 × 30 mL). The combined organic layers were washed with brine (2 × 30 mL), dried over anhydrous MgSO<sub>4</sub>, filtered and concentrated under vacuum. The residue was purified by column chromatography (hexane/ethyl acetate = 15/1) (V/V) on silica gel to afford the desired  $\alpha$ -bromocarboxylate product.

### 3.3 General Procedure for Products 3

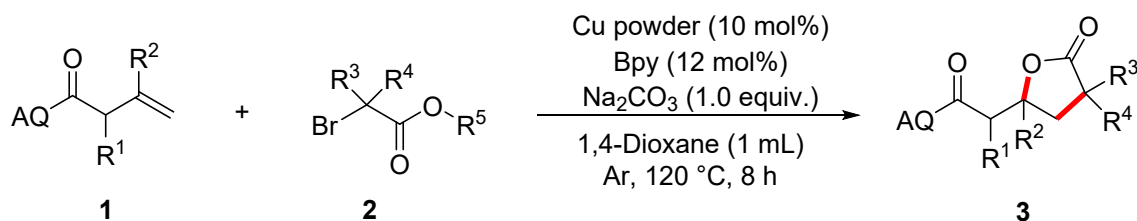

A Schlenk tube was equipped with a magnetic stir bar and charged with an alkene **1** (0.1 mmol, 1.0 equiv.), Cu powder (0.01 mmol, 0.1 equiv.), Bpy (0.012 mmol, 0.12 equiv.), Na<sub>2</sub>CO<sub>3</sub> (0.1 mmol, 1.0 equiv.) in 1,4-Dioxane (1.0 mL). Under argon atmosphere, an alkyl bromide **2** (0.2 mmol, 2.0 equiv.) was added quickly, and the resulting mixture was degassed three times and heated at 120 °C for 8 h. Upon completion, the reaction mixture was cooled to room temperature, and DCM (20 mL) was added. The resulting mixture was filtered through a pad of Celite, concentrated in vacuum. The residue was purified by column chromatography on silica gel (100-200 mesh) to afford a corresponding product **3**.

### 3.4 Gram-scale Experiment

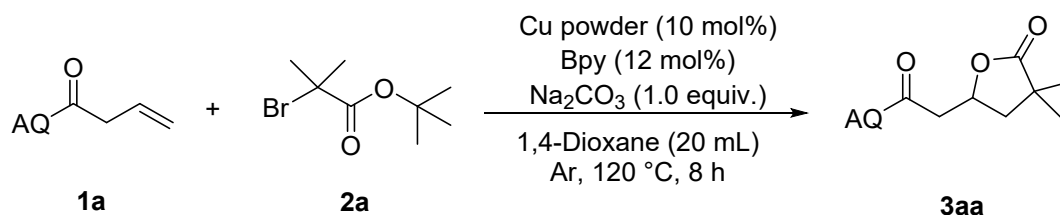



An oven-dried 50 mL Schlenk three-necked flask was equipped with a magnetic stirrer bar and charged with N-(8-quinolinyl)-3-butenamide **1a** (5 mmol, 1.0 equiv.), Cu powder (0.5 mmol, 0.1 equiv.), Bpy (0.6 mmol, 0.12 equiv.), Na<sub>2</sub>CO<sub>3</sub> (5 mmol, 1.0 equiv.) in 1,4-Dioxane (20 mL). Under the argon atmosphere, *tert*-butyl  $\alpha$ -bromoisobutyrate **2a** (10 mmol, 2.0 equiv.) was added quickly, and the resulting mixture was degassed three times and heated at 120 °C for 8 h. Upon completion, the reaction mixture was cooled to room temperature, and DCM (20 mL) was added. The resulting mixture was filtered through a pad of Celite, and concentrated in vacuum. The residue was purified by column chromatography (hexane/ethyl acetate = 5/1) (V/V) to afford **3aa** (1.014 g) as a light yellow solid in 68% yield.

### 3.5 The Experiment of Trapping the Radicals

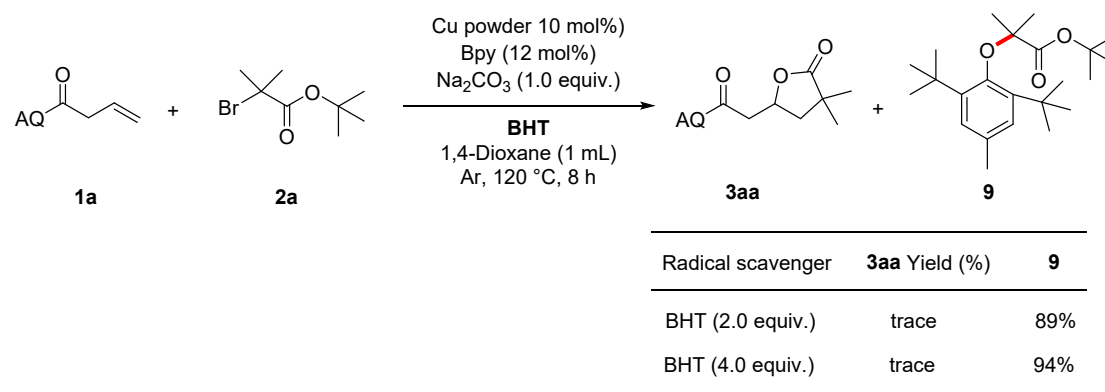

A Schlenk tube was equipped with a magnetic stir bar and charged with N-(8-quinolinyl)-3-butenamide **1a** (0.1 mmol, 1.0 equiv.), Cu powder (0.01 mmol, 0.1 equiv.), Bpy (0.012 mmol, 0.12 equiv.), Na<sub>2</sub>CO<sub>3</sub> (0.1 mmol, 1.0 equiv.), BHT (2.0 or 4.0 equiv.) in 1,4-Dioxane (1.0 mL). Under argon atmosphere, *tert*-butyl  $\alpha$ -bromoisobutyrate **2a** (0.2 mmol, 2.0 equiv.) was added quickly, and the resulting mixture was degassed three times and heated at 120 °C for 8 h. Upon completion, the reaction mixture was cooled to room temperature, and DCM (20 mL) was added to the reaction system. The resulting mixture was filtered through a pad of Celite, and concentrated in vacuum. The residue was purified by column chromatography on silica gel (100-200 mesh) using hexane-ethyl acetate as an eluent (50/1) (V/V) to afford an adduct of BHT and  $\alpha$ -carbonyl alkyl bromide as the product **9**.

**9**: yellow oil; <sup>1</sup>H NMR (400 MHz, CDCl<sub>3</sub>):  $\delta$  6.58 (s, 2H), 1.48 (s, 9H), 1.24 (s, 21H), 1.08 (s, 6H); <sup>13</sup>C NMR (100 MHz, CDCl<sub>3</sub>):  $\delta$  186.3, 174.7, 146.8, 143.9, 80.9, 49.1, 43.0, 34.9, 29.5, 28.1, 22.0, 21.8; HRMS (ESI) calcd for C<sub>23</sub>H<sub>39</sub>O<sub>3</sub><sup>+</sup> ([M + H]<sup>+</sup>): 363.2894, found: 363.2896.

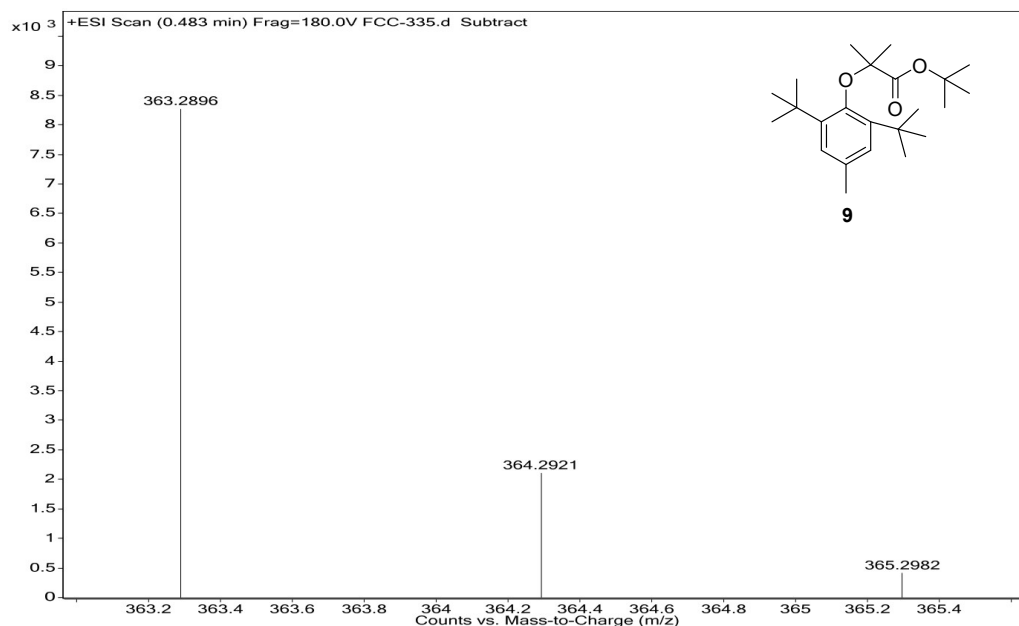

### 3.6 Isotopic Labelling Experiments

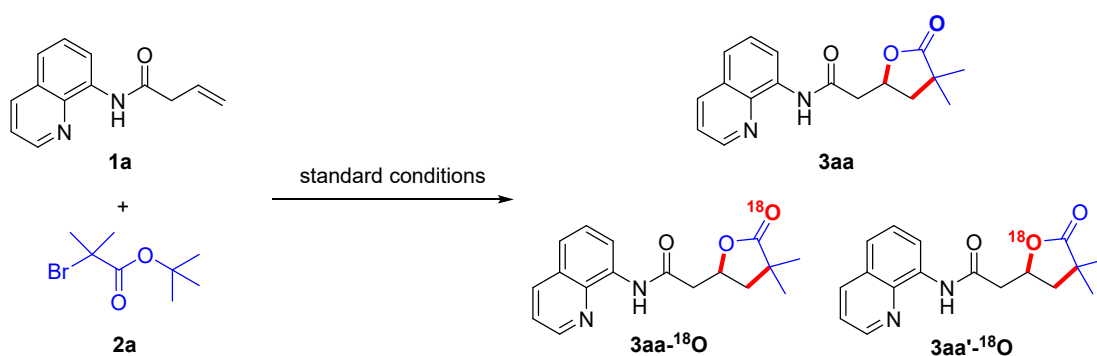

| $\text{H}_2^{18}\text{O}$ (x equiv.)    | Yield (%)                                                         |
|-----------------------------------------|-------------------------------------------------------------------|
| $\text{H}_2^{18}\text{O}$ (4.0 equiv.)  | <b>3aa</b> (65%), <b>3aa/3aa'-<math>^{18}\text{O}</math></b> (0%) |
| $\text{H}_2^{18}\text{O}$ (10.0 equiv.) | <b>3aa</b> (54%), <b>3aa/3aa'-<math>^{18}\text{O}</math></b> (0%) |

A Schlenk tube was equipped with a magnetic stir bar and charged with N-(8-quinolinyl)-3-butenamide **1a** (0.1 mmol, 1.0 equiv.), Cu powder (0.01 mmol, 0.1 equiv.), Bpy (0.012 mmol, 0.12 equiv.),  $\text{Na}_2\text{CO}_3$  (0.1 mmol, 1.0 equiv.),  $\text{H}_2^{18}\text{O}$  (4.0 or 10.0 equiv.) in 1,4-Dioxane (1.0 mL). Under argon atmosphere, *tert*-butyl  $\alpha$ -bromoisobutyrate **2a** (0.2 mmol, 2.0 equiv.) was added quickly, and the resulting mixture was degassed three times and heated at 120 °C for 8 h. Upon completion, the reaction mixture was cooled to room temperature, and DCM (20 mL) was added. The resulting mixture was filtered, and concentrated in vacuum. The residue was purified by column chromatography on silica gel (100-200 mesh).

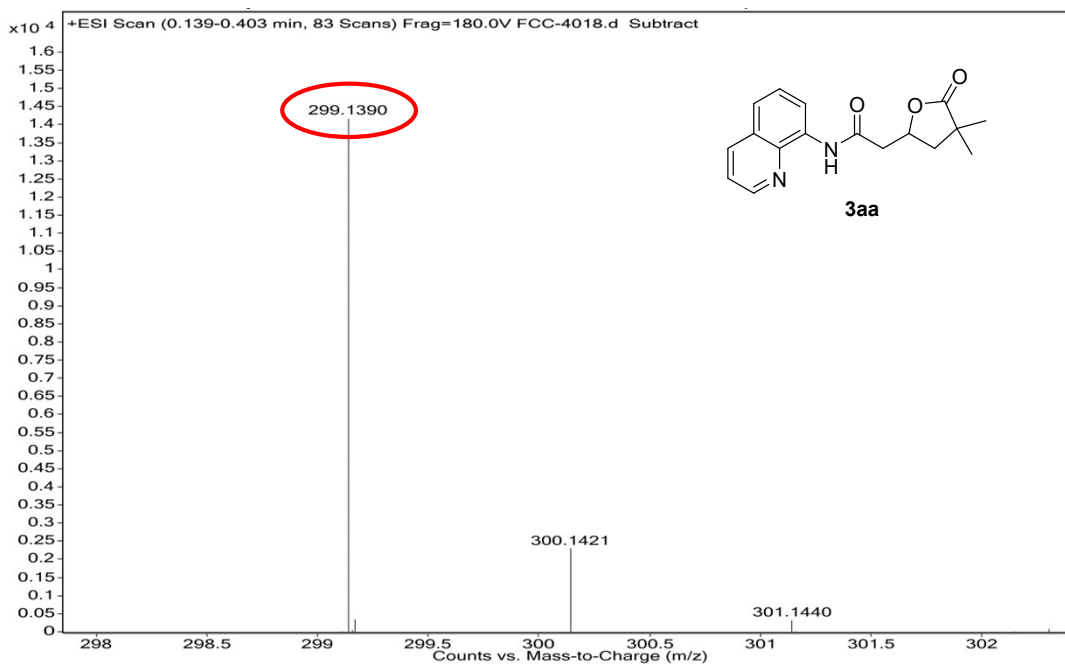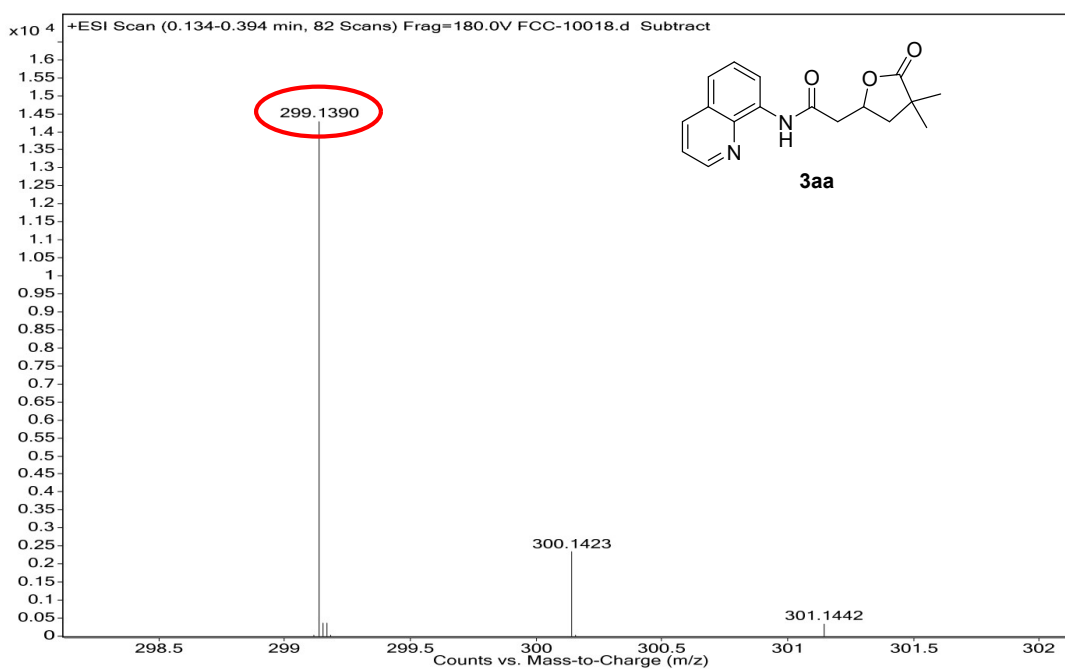

#### 4. Computational details

All geometry optimizations and transition state searches were performed with the program Gaussian 09 using the nonlocal method B3LYP.<sup>10, 11</sup> The LANL2DZ (Hay and Wadt's double-zeta effective core potential) basis set was used for Cu atom, and the 6-31G(d,p) basis set was used for C, H, O, N and Br atoms.<sup>12</sup> Solvation energies were obtained with the Truhlar's SMD solvation model, using acetonitrile as the model solvent.<sup>13</sup> The D3 version of Grimme's dispersion (GD3) was incorporated into the geometry optimizations. Throughout, we have employed harmonic vibrational

frequency calculations to confirm that the structures have been properly optimized. Intrinsic reaction coordination (IRC) calculations were performed to verify the connections between the transition state and the corresponding reactant and the product.<sup>14</sup> Single-point energy calculations were conducted with the 6-311G(2d,p)/LanL2TZ(f) basis set and the B3LYP functional.<sup>12</sup> The last number account for 1 atom/1M standard state change at 343.15K. All the relative energies throughout the paper are in kcal/mol and refer to Gibbs free energies with inclusion of the thermal contribution to the Gibbs free energy and the free energy of solvation.

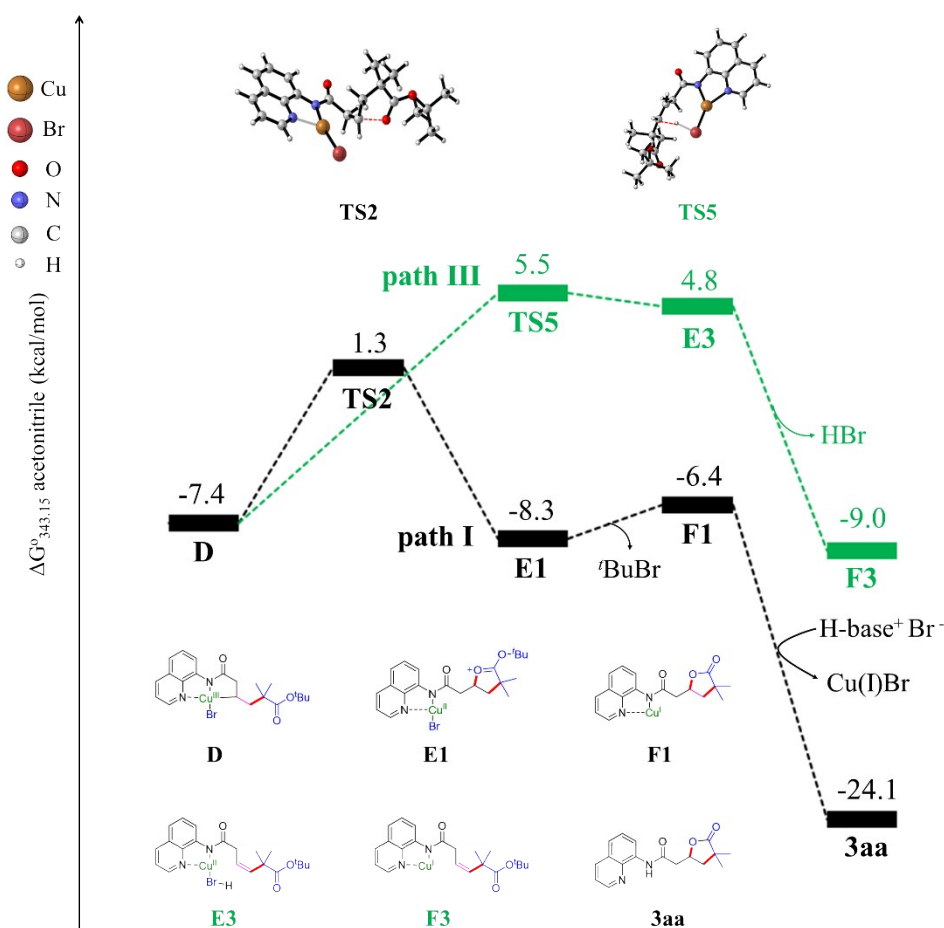

**Figure S1** The energy profiles of intramolecular cyclization and concerted H-Br elimination.

Another is to cleave the Cu-C bond starting from the **D** by  $\beta$ -H transferring to the Br atom bound to the Cu center, with a  $\Delta G^{\ddagger}$  value of 12.9 kcal/mol and a negative Gibbs free energy change ( $\Delta G^{\circ}$ ) value of 12.2 kcal/mol (path III). Then, the elimination of HBr gives the complex **F3**, with exoergicity of 1.6 kcal/mol. Therefore, our calculation showed that the  $\beta$ -H elimination is not a promising alternative route for production of the **3aa**, because this step lies 12.9 kcal/mol above **D** on the free energy profile. The highest transition state along path I is at 8.7 kcal/mol as well. Therefore, path I is more preferred than path III in terms of activation barriers and reaction energies.

### Cartesian Coordinates of Optimized Structures

**2a**

Geometry with 26 atoms:

Total energy: -3038.528675950

|    |           |           |           |
|----|-----------|-----------|-----------|
| O  | 0.481256  | 1.228098  | -1.406897 |
| C  | 0.211814  | 0.732382  | -0.328905 |
| O  | 1.049681  | 0.067874  | 0.465191  |
| C  | 2.447059  | -0.230759 | 0.065809  |
| C  | -1.193295 | 0.817913  | 0.292180  |
| C  | 3.222380  | 1.075199  | -0.107525 |
| H  | 2.852138  | 1.646366  | -0.959649 |
| H  | 3.138600  | 1.688577  | 0.795288  |
| H  | 4.280272  | 0.846068  | -0.270054 |
| C  | 2.439509  | -1.088828 | -1.199065 |
| H  | 3.457568  | -1.432607 | -1.406711 |
| H  | 1.801063  | -1.966153 | -1.055409 |
| H  | 2.078182  | -0.525761 | -2.060685 |
| C  | 2.967157  | -1.022882 | 1.263469  |
| H  | 2.374886  | -1.930959 | 1.411561  |
| H  | 4.008929  | -1.309895 | 1.093544  |
| H  | 2.916536  | -0.420271 | 2.175559  |
| C  | -1.183233 | 0.964053  | 1.806907  |
| H  | -2.205643 | 0.979684  | 2.192191  |
| H  | -0.627520 | 0.159609  | 2.288113  |
| H  | -0.703396 | 1.917587  | 2.059536  |
| C  | -2.035621 | 1.874418  | -0.402240 |
| H  | -1.603225 | 2.859119  | -0.189233 |
| H  | -2.045539 | 1.731160  | -1.483088 |
| H  | -3.059155 | 1.855293  | -0.021568 |
| Br | -2.004738 | -1.005559 | -0.153701 |

### 3aa

Geometry with 40 atoms:

Total energy: -993.827457764

|   |          |           |           |
|---|----------|-----------|-----------|
| C | 3.915552 | 2.823394  | -0.279675 |
| C | 4.678007 | 1.750494  | 0.123610  |
| C | 4.086818 | 0.463302  | 0.214285  |
| C | 2.705369 | 0.359780  | -0.128064 |
| C | 2.552210 | 2.611422  | -0.595713 |
| H | 5.847718 | -0.610866 | 0.882623  |
| H | 4.337259 | 3.819974  | -0.359026 |
| H | 5.728410 | 1.870607  | 0.375136  |
| C | 4.796472 | -0.696711 | 0.623222  |
| C | 2.051574 | -0.918697 | -0.055796 |
| H | 1.934154 | 3.448175  | -0.916149 |
| C | 2.772234 | -2.031243 | 0.347494  |

|   |           |           |           |
|---|-----------|-----------|-----------|
| C | 4.142145  | -1.907018 | 0.684068  |
| H | 2.280107  | -2.991524 | 0.402717  |
| H | 4.679361  | -2.798149 | 0.995944  |
| N | 1.962254  | 1.431031  | -0.525873 |
| C | -0.206041 | -1.933191 | -0.393729 |
| O | 0.072865  | -3.078599 | -0.045699 |
| C | -2.023127 | -0.123877 | -0.915125 |
| H | -1.400426 | 0.414529  | -1.635677 |
| C | -2.081354 | 0.602843  | 0.447712  |
| H | -1.674394 | 1.611960  | 0.342974  |
| H | -1.490276 | 0.083171  | 1.205304  |
| O | -3.374462 | -0.058881 | -1.453770 |
| C | -4.265220 | 0.364034  | -0.525232 |
| O | -5.444692 | 0.462684  | -0.782807 |
| C | -3.580077 | 0.656783  | 0.809235  |
| C | -1.619492 | -1.597518 | -0.861138 |
| H | -2.296695 | -2.142828 | -0.198080 |
| H | -1.734354 | -2.034864 | -1.860138 |
| N | 0.699185  | -0.905934 | -0.416904 |
| H | 0.402006  | 0.020311  | -0.710227 |
| C | -3.993441 | -0.445138 | 1.806390  |
| H | -3.510269 | -0.265430 | 2.772215  |
| H | -5.077963 | -0.440259 | 1.953553  |
| H | -3.699590 | -1.439945 | 1.457891  |
| C | -4.026786 | 2.030793  | 1.326612  |
| H | -3.535407 | 2.249811  | 2.280223  |
| H | -3.768750 | 2.824133  | 0.617283  |
| H | -5.109713 | 2.047184  | 1.482158  |

## A

Geometry with 25 atoms:

|               |                |           |           |
|---------------|----------------|-----------|-----------|
| Total energy: | -464.307951896 |           |           |
| O             | 0.567945       | -1.655409 | -0.004230 |
| C             | 0.735638       | -0.433738 | -0.003307 |
| O             | -0.266827      | 0.479663  | 0.001081  |
| C             | -1.683508      | 0.085020  | 0.000903  |
| C             | 2.041683       | 0.209366  | -0.006798 |
| C             | 2.161451       | 1.698935  | -0.003021 |
| H             | 3.205694       | 2.012156  | -0.086104 |
| H             | 1.591003       | 2.147631  | -0.825658 |
| H             | 1.746128       | 2.126501  | 0.920359  |
| C             | 3.266568       | -0.638421 | 0.005901  |
| H             | 3.021544       | -1.701833 | 0.014256  |
| H             | 3.894104       | -0.423458 | -0.871267 |

|   |           |           |           |
|---|-----------|-----------|-----------|
| H | 3.886383  | -0.408048 | 0.884821  |
| C | -2.405676 | 1.432792  | 0.004479  |
| H | -3.488856 | 1.278161  | 0.005408  |
| H | -2.136067 | 2.011661  | 0.893481  |
| H | -2.138171 | 2.015301  | -0.882793 |
| C | -2.008080 | -0.705455 | 1.271004  |
| H | -3.087854 | -0.877273 | 1.327538  |
| H | -1.496975 | -1.668848 | 1.276466  |
| H | -1.703753 | -0.138311 | 2.156826  |
| C | -2.009460 | -0.699454 | -1.272547 |
| H | -3.089322 | -0.870803 | -1.328815 |
| H | -1.705887 | -0.128199 | -2.155981 |
| H | -1.498605 | -1.662939 | -1.283035 |

## B

Geometry with 28 atoms:

Total energy: -882.894266410

|   |           |           |           |
|---|-----------|-----------|-----------|
| C | 3.028625  | -2.287096 | 0.053776  |
| C | 3.625218  | -1.046299 | 0.026934  |
| C | 2.826387  | 0.125993  | -0.000399 |
| C | 1.407920  | -0.038829 | -0.000944 |
| C | 1.620405  | -2.362440 | 0.053197  |
| H | 4.461293  | 1.549432  | -0.028078 |
| H | 3.614785  | -3.199523 | 0.076355  |
| H | 4.707532  | -0.947364 | 0.027308  |
| C | 3.381500  | 1.433045  | -0.025848 |
| C | 0.534506  | 1.120790  | -0.024896 |
| H | 1.118076  | -3.324763 | 0.076226  |
| C | 1.134506  | 2.382569  | -0.046461 |
| C | 2.539702  | 2.525627  | -0.047479 |
| H | 0.492267  | 3.253484  | -0.059648 |
| H | 2.960234  | 3.528005  | -0.066748 |
| N | 0.838638  | -1.290128 | 0.026580  |
| N | -0.807868 | 0.824795  | -0.016662 |
| C | -1.837636 | 1.698441  | 0.063041  |
| O | -1.805137 | 2.937965  | 0.088593  |
| C | -3.188086 | 0.945327  | 0.202899  |
| H | -3.390927 | 0.843356  | 1.276706  |
| H | -3.977665 | 1.574302  | -0.222503 |
| C | -3.203205 | -0.416760 | -0.455211 |
| H | -3.188448 | -0.400962 | -1.547104 |
| C | -3.393740 | -1.624248 | 0.167323  |
| H | -3.565482 | -2.528457 | -0.410604 |
| H | -3.560723 | -1.681808 | 1.241766  |

Cu -1.251788 -1.160304 -0.032326

### **Br-**

Geometry with 1 atoms:

Total energy: -2574.247273620

Br 0.000000 0.000000 0.000000

### **CuBr**

Geometry with 2 atoms:

Total energy: -2770.364963710

Cu 0.000000 0.000000 -1.255933

Br 0.000000 0.000000 1.040630

### **C(closed-shell)**

Geometry with 54 atoms:

Total energy: -3921.821222820

C -0.248791 -3.817891 -0.259164  
C -1.586675 -4.004352 -0.532843  
C -2.479204 -2.903026 -0.503281  
C -1.935837 -1.618512 -0.199464  
C 0.200734 -2.517986 0.045011  
H -4.274415 -3.996794 -1.033382  
H 0.456191 -4.641763 -0.268826  
H -1.974660 -4.991142 -0.770263  
C -3.864390 -3.022350 -0.785928  
C -2.771126 -0.441889 -0.155551  
H 1.245455 -2.340195 0.288139  
C -4.128100 -0.618839 -0.452754  
C -4.654017 -1.892453 -0.759474  
H -4.780685 0.240396 -0.423451  
H -5.714960 -1.971572 -0.980891  
N -0.602460 -1.467044 0.052940  
N -2.126936 0.738166 0.189488  
C -2.789011 1.914522 0.430095  
O -4.019307 2.060787 0.453483  
C -1.889014 3.104024 0.754478  
H -1.077044 3.166548 0.019087  
H -2.495882 4.008923 0.629615  
C -1.299675 3.106649 2.144642  
H -0.680811 3.977009 2.365571  
C -1.475235 2.182839 3.092938  
H -2.075915 1.291620 2.928789  
H -1.017454 2.289881 4.072738  
Cu -0.139912 0.600899 -0.009578



|    |          |           |           |
|----|----------|-----------|-----------|
| Br | 0.220779 | 1.853233  | -2.113212 |
| O  | 1.725256 | 0.726959  | 0.573607  |
| C  | 2.474674 | -0.144739 | 1.096228  |
| O  | 3.615976 | -0.558149 | 0.538108  |
| C  | 4.015465 | -0.202967 | -0.847005 |
| C  | 2.181027 | -0.726584 | 2.376993  |
| C  | 4.111116 | 1.314207  | -1.018111 |
| H  | 3.123758 | 1.774379  | -1.065994 |
| H  | 4.683249 | 1.753535  | -0.194295 |
| H  | 4.641851 | 1.527315  | -1.951892 |
| C  | 3.017236 | -0.839575 | -1.813916 |
| H  | 3.379233 | -0.706558 | -2.838515 |
| H  | 2.926517 | -1.912529 | -1.617952 |
| H  | 2.036747 | -0.366093 | -1.740822 |
| C  | 5.391241 | -0.857373 | -0.955842 |
| H  | 5.322550 | -1.933485 | -0.769230 |
| H  | 5.794129 | -0.703062 | -1.960711 |
| H  | 6.085203 | -0.419998 | -0.231332 |
| C  | 3.133599 | -1.621708 | 3.068795  |
| H  | 2.617279 | -2.547031 | 3.363108  |
| H  | 4.014838 | -1.859128 | 2.475526  |
| H  | 3.447117 | -1.152398 | 4.014283  |
| C  | 0.871904 | -0.446393 | 2.994591  |
| H  | 0.888067 | -0.615788 | 4.073715  |
| H  | 0.512819 | 0.560857  | 2.758110  |
| H  | 0.121855 | -1.130402 | 2.557856  |

### C(open-shell)

Geometry with 54 atoms:

Total energy: -3921.850005100

|   |           |           |           |
|---|-----------|-----------|-----------|
| C | 1.823207  | 3.408646  | -1.420609 |
| C | 3.175285  | 3.174568  | -1.285085 |
| C | 3.636089  | 1.962778  | -0.708397 |
| C | 2.649492  | 1.024243  | -0.287180 |
| C | 0.914654  | 2.427699  | -0.973115 |
| H | 5.764571  | 2.349551  | -0.863955 |
| H | 1.447585  | 4.326400  | -1.859676 |
| H | 3.902779  | 3.909738  | -1.618203 |
| C | 5.007682  | 1.640981  | -0.541490 |
| C | 3.010689  | -0.237093 | 0.301716  |
| H | -0.159555 | 2.565342  | -1.045827 |
| C | 4.373319  | -0.508872 | 0.438723  |
| C | 5.346798  | 0.428228  | 0.019725  |
| H | 4.677383  | -1.446595 | 0.879359  |

|    |           |           |           |
|----|-----------|-----------|-----------|
| H  | 6.394665  | 0.170753  | 0.149383  |
| N  | 1.319577  | 1.289437  | -0.433084 |
| N  | 1.938943  | -1.040526 | 0.679179  |
| C  | 2.054292  | -2.250813 | 1.293666  |
| O  | 3.114864  | -2.791445 | 1.633434  |
| C  | 0.731781  | -2.991542 | 1.519549  |
| H  | 0.563471  | -3.599496 | 0.623926  |
| H  | 0.887941  | -3.682372 | 2.355527  |
| C  | -0.500511 | -2.156141 | 1.764399  |
| H  | -1.428155 | -2.542744 | 1.350260  |
| C  | -0.549294 | -1.022914 | 2.489996  |
| H  | 0.336761  | -0.591309 | 2.947639  |
| H  | -1.492442 | -0.514251 | 2.661029  |
| Cu | 0.172578  | -0.360392 | 0.111090  |
| Br | -0.234470 | -1.974373 | -1.785727 |
| O  | -1.567288 | 0.643444  | -0.125510 |
| C  | -2.479991 | 1.175886  | 0.546834  |
| O  | -3.766868 | 0.981426  | 0.269536  |
| C  | -4.235437 | -0.020129 | -0.726247 |
| C  | -2.271329 | 2.078634  | 1.659002  |
| C  | -3.806483 | -1.412150 | -0.263597 |
| H  | -2.730272 | -1.549240 | -0.374521 |
| H  | -4.099586 | -1.573673 | 0.778949  |
| H  | -4.310425 | -2.162520 | -0.881393 |
| C  | -3.703045 | 0.320122  | -2.119397 |
| H  | -4.245430 | -0.279762 | -2.857637 |
| H  | -3.877777 | 1.377060  | -2.346172 |
| H  | -2.638808 | 0.096482  | -2.203053 |
| C  | -5.751065 | 0.151027  | -0.654723 |
| H  | -6.039839 | 1.167212  | -0.940697 |
| H  | -6.233368 | -0.553348 | -1.338260 |
| H  | -6.114039 | -0.043110 | 0.359294  |
| C  | -3.449045 | 2.679087  | 2.352587  |
| H  | -3.134006 | 3.421667  | 3.089352  |
| H  | -4.136214 | 3.149019  | 1.639490  |
| H  | -4.030245 | 1.902558  | 2.869516  |
| C  | -0.897458 | 2.409356  | 2.123307  |
| H  | -0.826094 | 2.269624  | 3.209864  |
| H  | -0.125317 | 1.815288  | 1.637338  |
| H  | -0.684966 | 3.472753  | 1.936959  |

## D

Geometry with 54 atoms:

Total energy: -3921.470713640

|    |           |           |           |
|----|-----------|-----------|-----------|
| C  | 4.568217  | 1.786164  | 1.675353  |
| C  | 5.152058  | 0.548168  | 1.838504  |
| C  | 4.579132  | -0.594349 | 1.223362  |
| C  | 3.401866  | -0.394935 | 0.448374  |
| C  | 3.399866  | 1.894545  | 0.893573  |
| H  | 6.003341  | -2.065487 | 1.937231  |
| H  | 4.986222  | 2.674569  | 2.135762  |
| H  | 6.051376  | 0.430853  | 2.436833  |
| C  | 5.107817  | -1.905754 | 1.344550  |
| C  | 2.750049  | -1.485745 | -0.213614 |
| H  | 2.901095  | 2.846209  | 0.739661  |
| C  | 3.299266  | -2.756861 | -0.063426 |
| C  | 4.468538  | -2.949307 | 0.710966  |
| H  | 2.827825  | -3.596964 | -0.551639 |
| H  | 4.864083  | -3.957267 | 0.799955  |
| N  | 2.842165  | 0.846067  | 0.307273  |
| N  | 1.616072  | -1.127309 | -0.950909 |
| C  | 0.869736  | -1.984510 | -1.718305 |
| O  | 1.074656  | -3.187636 | -1.864180 |
| C  | -0.252728 | -1.237193 | -2.427676 |
| H  | 0.087755  | -1.062326 | -3.454655 |
| H  | -1.132109 | -1.886245 | -2.478484 |
| C  | -0.597030 | 0.082799  | -1.772595 |
| H  | -0.607991 | 0.915373  | -2.474453 |
| C  | -1.780626 | 0.180736  | -0.835015 |
| H  | -2.636275 | -0.079123 | -1.479728 |
| H  | -1.899491 | 1.233260  | -0.564697 |
| Cu | 1.106820  | 0.709066  | -0.782675 |
| Br | 0.425435  | 2.974377  | -0.727273 |
| O  | -3.418431 | 0.264279  | 2.158340  |
| C  | -3.278112 | -0.263488 | 1.070042  |
| O  | -4.277395 | -0.579971 | 0.232891  |
| C  | -5.696595 | -0.301515 | 0.546639  |
| C  | -1.915299 | -0.666854 | 0.468135  |
| C  | -5.903847 | 1.205099  | 0.706400  |
| H  | -6.974003 | 1.414653  | 0.801675  |
| H  | -5.391553 | 1.583421  | 1.591650  |
| H  | -5.527502 | 1.734318  | -0.175059 |
| C  | -6.417582 | -0.822861 | -0.695243 |
| H  | -6.220613 | -1.890220 | -0.835782 |
| H  | -7.496659 | -0.679204 | -0.587020 |
| H  | -6.082865 | -0.286696 | -1.588796 |
| C  | -6.111187 | -1.088833 | 1.790291  |
| H  | -7.190905 | -0.988016 | 1.939236  |

|   |           |           |           |
|---|-----------|-----------|-----------|
| H | -5.879959 | -2.150983 | 1.660021  |
| H | -5.598288 | -0.722078 | 2.680224  |
| C | -0.822144 | -0.331775 | 1.491797  |
| H | 0.131106  | -0.757390 | 1.169378  |
| H | -0.700908 | 0.749292  | 1.608259  |
| H | -1.070163 | -0.753944 | 2.468943  |
| C | -1.952493 | -2.189071 | 0.213702  |
| H | -2.684976 | -2.448839 | -0.554206 |
| H | -0.973055 | -2.559831 | -0.093687 |
| H | -2.225220 | -2.714882 | 1.135672  |

## E1

Geometry with 54 atoms:

Total energy: -3921.464696490

|    |           |           |           |
|----|-----------|-----------|-----------|
| C  | 5.639791  | 1.842143  | 0.951092  |
| C  | 6.177078  | 0.591033  | 0.747048  |
| C  | 5.354469  | -0.471463 | 0.290889  |
| C  | 3.971938  | -0.188467 | 0.056559  |
| C  | 4.266723  | 2.034973  | 0.695105  |
| H  | 6.905744  | -1.985822 | 0.246627  |
| H  | 6.245133  | 2.672226  | 1.299765  |
| H  | 7.230933  | 0.398680  | 0.930982  |
| C  | 5.854660  | -1.779654 | 0.066430  |
| C  | 3.068591  | -1.224179 | -0.407739 |
| H  | 3.805103  | 3.007425  | 0.843082  |
| C  | 3.621841  | -2.495130 | -0.606718 |
| C  | 4.989846  | -2.757669 | -0.373877 |
| H  | 2.971985  | -3.288469 | -0.944793 |
| H  | 5.359389  | -3.765064 | -0.549577 |
| N  | 3.468628  | 1.065955  | 0.267442  |
| N  | 1.750891  | -0.835542 | -0.623303 |
| C  | 0.777955  | -1.723117 | -0.943906 |
| O  | 0.859943  | -2.961379 | -1.063000 |
| C  | -1.243819 | -0.896047 | 0.252082  |
| H  | -0.652155 | -0.211689 | 0.858483  |
| C  | -1.670854 | -2.172106 | 0.995103  |
| H  | -1.407582 | -2.095720 | 2.052242  |
| H  | -1.165888 | -3.042416 | 0.571724  |
| Cu | 1.435532  | 1.192687  | -0.187054 |
| O  | -2.531200 | -0.143447 | 0.049563  |
| C  | -3.537306 | -0.869594 | 0.372565  |
| O  | -4.733690 | -0.448082 | 0.284387  |
| C  | -5.128045 | 0.954300  | -0.242444 |
| C  | -3.212388 | -2.265562 | 0.834663  |

|    |           |           |           |
|----|-----------|-----------|-----------|
| C  | -0.609039 | -1.079238 | -1.115243 |
| H  | -1.226817 | -1.742305 | -1.725725 |
| H  | -0.531336 | -0.097213 | -1.588509 |
| Br | -0.358088 | 2.698237  | -0.115377 |
| C  | -4.462772 | 2.007179  | 0.634302  |
| H  | -3.387509 | 2.080896  | 0.457898  |
| H  | -4.916688 | 2.972885  | 0.391160  |
| H  | -4.650256 | 1.801614  | 1.692326  |
| C  | -4.716066 | 1.020694  | -1.705447 |
| H  | -3.631075 | 1.028700  | -1.822079 |
| H  | -5.139162 | 0.182564  | -2.266157 |
| H  | -5.111232 | 1.950678  | -2.125046 |
| C  | -6.636792 | 0.915570  | -0.061456 |
| H  | -6.899894 | 0.797092  | 0.993377  |
| H  | -7.057952 | 1.858155  | -0.421377 |
| H  | -7.077083 | 0.095327  | -0.635013 |
| C  | -3.639872 | -3.240594 | -0.287598 |
| H  | -3.364469 | -4.254660 | 0.014903  |
| H  | -4.721417 | -3.201424 | -0.444930 |
| H  | -3.136774 | -3.012390 | -1.231351 |
| C  | -3.944698 | -2.590341 | 2.145472  |
| H  | -3.639568 | -3.584592 | 2.483561  |
| H  | -3.695269 | -1.865930 | 2.926499  |
| H  | -5.028012 | -2.590776 | 1.996839  |

## E2

Geometry with 54 atoms:

Total energy: -3921.427698590

|   |          |           |           |
|---|----------|-----------|-----------|
| C | 5.160943 | 1.716873  | -2.213479 |
| C | 5.464533 | 2.054858  | -0.914571 |
| C | 4.732721 | 1.488830  | 0.161686  |
| C | 3.684520 | 0.565095  | -0.152444 |
| C | 4.111757 | 0.803814  | -2.441004 |
| H | 5.809502 | 2.516400  | 1.736943  |
| H | 5.703434 | 2.135836  | -3.054227 |
| H | 6.263664 | 2.757155  | -0.692440 |
| C | 5.011345 | 1.814857  | 1.512706  |
| C | 2.900142 | -0.053671 | 0.904780  |
| H | 3.836982 | 0.514527  | -3.451168 |
| C | 3.230311 | 0.309385  | 2.216879  |
| C | 4.260388 | 1.228686  | 2.507208  |
| H | 2.676861 | -0.142821 | 3.026023  |
| H | 4.459595 | 1.468812  | 3.548641  |
| N | 3.407966 | 0.254924  | -1.459520 |

|    |           |           |           |
|----|-----------|-----------|-----------|
| N  | 1.859646  | -0.901686 | 0.523049  |
| C  | 1.178979  | -1.658300 | 1.421068  |
| O  | 1.447442  | -1.836430 | 2.622455  |
| C  | -0.051474 | -2.422056 | 0.884326  |
| H  | 0.302401  | -3.395979 | 0.526418  |
| H  | -0.684630 | -2.619166 | 1.750647  |
| C  | -1.373693 | -0.336661 | -0.072810 |
| H  | -2.014257 | -0.137085 | -0.935023 |
| H  | -0.477183 | 0.284991  | -0.197869 |
| Cu | 1.817837  | -1.036271 | -1.515781 |
| O  | -2.300910 | 2.596236  | 1.279124  |
| C  | -2.690870 | 1.533656  | 0.829368  |
| O  | -3.674087 | 1.398059  | -0.074495 |
| C  | -4.374511 | 2.555433  | -0.669026 |
| C  | -2.105231 | 0.157629  | 1.214254  |
| C  | -0.864655 | -1.771712 | -0.228265 |
| H  | -0.314250 | -1.805622 | -1.171636 |
| Br | -2.387236 | -3.050606 | -0.696769 |
| C  | -1.139676 | 0.374986  | 2.390298  |
| H  | -0.747168 | -0.571103 | 2.762548  |
| H  | -0.294256 | 1.004847  | 2.100212  |
| H  | -1.659086 | 0.874449  | 3.213777  |
| C  | -3.265259 | -0.756616 | 1.657746  |
| H  | -3.970573 | -0.937177 | 0.846103  |
| H  | -2.882170 | -1.721310 | 1.998503  |
| H  | -3.804818 | -0.293408 | 2.491877  |
| C  | -5.107741 | 3.336782  | 0.422437  |
| H  | -4.406589 | 3.825929  | 1.099497  |
| H  | -5.739925 | 4.100115  | -0.042226 |
| H  | -5.749539 | 2.664924  | 1.001467  |
| C  | -3.375427 | 3.419099  | -1.440830 |
| H  | -2.834133 | 2.810158  | -2.172374 |
| H  | -3.914615 | 4.204108  | -1.980531 |
| H  | -2.655084 | 3.887416  | -0.768863 |
| C  | -5.366514 | 1.887700  | -1.620112 |
| H  | -6.049919 | 1.234974  | -1.068039 |
| H  | -5.955603 | 2.649113  | -2.139971 |
| H  | -4.839019 | 1.285375  | -2.366397 |

## F1

Geometry with 40 atoms:

Total energy: -1189.399499000

|   |           |           |          |
|---|-----------|-----------|----------|
| C | -3.920981 | -2.627873 | 0.119665 |
|---|-----------|-----------|----------|

|   |           |           |          |
|---|-----------|-----------|----------|
| C | -4.617817 | -1.471931 | 0.388712 |
|---|-----------|-----------|----------|

|    |           |           |           |
|----|-----------|-----------|-----------|
| C  | -3.965507 | -0.213036 | 0.325557  |
| C  | -2.578711 | -0.195389 | -0.028717 |
| C  | -2.555478 | -2.526485 | -0.214421 |
| H  | -5.694078 | 0.975704  | 0.871364  |
| H  | -4.395202 | -3.602671 | 0.160693  |
| H  | -5.671572 | -1.504263 | 0.652967  |
| C  | -4.642170 | 1.002157  | 0.602253  |
| C  | -1.852519 | 1.062437  | -0.118108 |
| H  | -1.969209 | -3.415224 | -0.429384 |
| C  | -2.576444 | 2.224642  | 0.178214  |
| C  | -3.943262 | 2.187201  | 0.527228  |
| H  | -2.057240 | 3.171037  | 0.137904  |
| H  | -4.448444 | 3.126128  | 0.740545  |
| N  | -1.914193 | -1.367124 | -0.285823 |
| N  | -0.524526 | 0.994184  | -0.520703 |
| C  | 0.320547  | 2.059362  | -0.471932 |
| O  | 0.094556  | 3.202269  | -0.032606 |
| C  | 2.739983  | 1.589306  | 0.138367  |
| H  | 2.891726  | 2.553529  | 0.628169  |
| C  | 4.061409  | 0.917487  | -0.281139 |
| H  | 4.893242  | 1.354561  | 0.278583  |
| H  | 4.262408  | 1.053052  | -1.346699 |
| Cu | 0.045159  | -0.961099 | -0.769774 |
| O  | 2.194007  | 0.713829  | 1.175968  |
| C  | 2.766587  | -0.507453 | 1.147423  |
| O  | 2.392040  | -1.405301 | 1.873370  |
| C  | 3.888025  | -0.567421 | 0.109766  |
| C  | 1.724904  | 1.750745  | -0.997112 |
| H  | 2.062064  | 2.593665  | -1.610327 |
| H  | 1.715921  | 0.855710  | -1.623833 |
| C  | 5.147668  | -1.172510 | 0.744889  |
| H  | 4.949166  | -2.190075 | 1.094872  |
| H  | 5.957443  | -1.210209 | 0.008871  |
| H  | 5.486758  | -0.575592 | 1.597960  |
| C  | 3.410765  | -1.463740 | -1.052677 |
| H  | 4.182597  | -1.511195 | -1.827641 |
| H  | 3.216801  | -2.478581 | -0.692010 |
| H  | 2.492219  | -1.084486 | -1.514592 |

## F2

Geometry with 54 atoms:

Total energy: -3725.864038240

|   |          |           |           |
|---|----------|-----------|-----------|
| C | 3.822170 | -1.184116 | -2.611168 |
| C | 4.467993 | -0.991153 | -1.410884 |

|    |           |           |           |
|----|-----------|-----------|-----------|
| C  | 3.764566  | -1.193041 | -0.195014 |
| C  | 2.398120  | -1.593986 | -0.295196 |
| C  | 2.464005  | -1.583111 | -2.598791 |
| H  | 5.385726  | -0.690529 | 1.152958  |
| H  | 4.330328  | -1.034672 | -3.558086 |
| H  | 5.509097  | -0.681815 | -1.375984 |
| C  | 4.346483  | -0.998816 | 1.085471  |
| C  | 1.630724  | -1.788140 | 0.903720  |
| H  | 1.937036  | -1.738620 | -3.538402 |
| C  | 2.228864  | -1.594714 | 2.137182  |
| C  | 3.586443  | -1.199066 | 2.216207  |
| H  | 1.649333  | -1.734731 | 3.038438  |
| H  | 4.025793  | -1.051709 | 3.198468  |
| N  | 1.770568  | -1.780827 | -1.491051 |
| C  | -0.769566 | -1.843966 | 1.531745  |
| O  | -0.635374 | -1.521716 | 2.709252  |
| C  | -2.153700 | -1.923085 | 0.882403  |
| H  | -2.388877 | -2.973832 | 0.679742  |
| H  | -2.855640 | -1.570359 | 1.635045  |
| C  | -1.573084 | 0.214993  | -0.565565 |
| H  | -1.597733 | 0.491892  | -1.622662 |
| H  | -0.525083 | -0.020527 | -0.366480 |
| O  | -0.566265 | 2.973062  | 1.584538  |
| C  | -0.702609 | 2.289690  | 0.585300  |
| O  | 0.199458  | 2.185936  | -0.401506 |
| C  | 1.559149  | 2.760881  | -0.305168 |
| C  | -1.972415 | 1.467605  | 0.277725  |
| C  | -2.280592 | -1.135411 | -0.437774 |
| H  | -1.901331 | -1.752718 | -1.253302 |
| Br | -4.241618 | -1.032676 | -0.910128 |
| N  | 0.286382  | -2.140557 | 0.705494  |
| H  | 0.087937  | -2.338209 | -0.272276 |
| C  | -2.886421 | 2.399591  | -0.556377 |
| H  | -2.392013 | 2.705334  | -1.484225 |
| H  | -3.812170 | 1.879618  | -0.815660 |
| H  | -3.141057 | 3.300271  | 0.012014  |
| C  | -2.658535 | 1.149414  | 1.615802  |
| H  | -3.603247 | 0.629371  | 1.441169  |
| H  | -2.026405 | 0.533070  | 2.259337  |
| H  | -2.872375 | 2.078567  | 2.148867  |
| C  | 1.471068  | 4.286267  | -0.289461 |
| H  | 0.982345  | 4.639745  | 0.619527  |
| H  | 2.479224  | 4.710417  | -0.337160 |
| H  | 0.906917  | 4.643010  | -1.157295 |



|   |          |          |           |
|---|----------|----------|-----------|
| C | 2.269031 | 2.194868 | 0.926083  |
| H | 2.201642 | 1.103760 | 0.930595  |
| H | 3.327171 | 2.472333 | 0.893024  |
| H | 1.833998 | 2.578021 | 1.849888  |
| C | 2.218246 | 2.253957 | -1.587093 |
| H | 1.675987 | 2.612411 | -2.467643 |
| H | 3.250339 | 2.612162 | -1.643823 |
| H | 2.228836 | 1.160860 | -1.605844 |

## G

Geometry with 53 atoms:

Total energy: -1151.447792600

|   |           |           |           |
|---|-----------|-----------|-----------|
| C | 5.868521  | 2.647388  | 0.476088  |
| C | 6.412058  | 1.382817  | 0.476739  |
| C | 5.581397  | 0.261723  | 0.216588  |
| C | 4.200785  | 0.522359  | -0.035041 |
| C | 4.485290  | 2.795108  | 0.214289  |
| H | 7.109842  | -1.265746 | 0.390201  |
| H | 6.475800  | 3.525028  | 0.671645  |
| H | 7.469122  | 1.225001  | 0.673388  |
| C | 6.057861  | -1.075715 | 0.197940  |
| C | 3.313124  | -0.575656 | -0.303174 |
| H | 4.038905  | 3.787881  | 0.209986  |
| C | 3.809206  | -1.869115 | -0.314985 |
| C | 5.182210  | -2.106027 | -0.062811 |
| H | 3.141747  | -2.694211 | -0.518285 |
| H | 5.540415  | -3.131243 | -0.079251 |
| N | 3.675822  | 1.779985  | -0.032012 |
| C | 0.907870  | -1.019174 | -0.793309 |
| O | 0.960409  | -2.244918 | -0.886528 |
| C | -1.153763 | -0.299150 | 0.418882  |
| H | -0.593815 | 0.245442  | 1.179241  |
| C | -1.665392 | -1.663802 | 0.903973  |
| H | -1.540274 | -1.740320 | 1.985784  |
| H | -1.110978 | -2.473915 | 0.428931  |
| O | -2.405526 | 0.515387  | 0.236976  |
| C | -3.445767 | -0.245386 | 0.290210  |
| O | -4.623433 | 0.193423  | 0.126180  |
| C | -5.005503 | 1.661219  | -0.201536 |
| C | -3.172074 | -1.704282 | 0.537937  |
| C | -0.419294 | -0.272234 | -0.919646 |
| H | -1.014387 | -0.785010 | -1.677944 |
| H | -0.270160 | 0.767515  | -1.223754 |
| N | 1.978985  | -0.215420 | -0.533648 |

|   |           |           |           |
|---|-----------|-----------|-----------|
| H | 1.829434  | 0.789491  | -0.482209 |
| C | -4.543287 | 2.533801  | 0.955106  |
| H | -3.456074 | 2.608943  | 1.006895  |
| H | -4.947688 | 3.538004  | 0.797160  |
| H | -4.929425 | 2.154308  | 1.905198  |
| C | -4.373536 | 2.009339  | -1.540139 |
| H | -3.285649 | 2.067192  | -1.478800 |
| H | -4.657868 | 1.279975  | -2.303583 |
| H | -4.750822 | 2.990259  | -1.844116 |
| C | -6.519056 | 1.554046  | -0.281259 |
| H | -6.936737 | 1.222800  | 0.673331  |
| H | -6.926532 | 2.540974  | -0.516740 |
| H | -6.819230 | 0.855779  | -1.067144 |
| C | -3.460231 | -2.472366 | -0.774688 |
| H | -3.211179 | -3.524933 | -0.615659 |
| H | -4.518489 | -2.396631 | -1.039232 |
| H | -2.860844 | -2.096403 | -1.608302 |
| C | -4.059074 | -2.235426 | 1.675336  |
| H | -3.791423 | -3.277369 | 1.871190  |
| H | -3.911717 | -1.659182 | 2.593458  |
| H | -5.115303 | -2.193526 | 1.396210  |

### **HBr**

Geometry with 2 atoms:

Total energy: -2574.774155870

|    |          |          |           |
|----|----------|----------|-----------|
| Br | 0.000000 | 0.000000 | 0.039572  |
| H  | 0.000000 | 0.000000 | -1.385030 |

### **TS1(closed-shell)**

Geometry with 54 atoms:

Total energy: -3921.375927400

|   |          |           |           |
|---|----------|-----------|-----------|
| C | 2.745173 | -3.602945 | -0.445718 |
| C | 3.873028 | -2.947548 | -0.887440 |
| C | 3.951567 | -1.533842 | -0.800491 |
| C | 2.830322 | -0.837809 | -0.251418 |
| C | 1.690532 | -2.837815 | 0.092981  |
| H | 5.938772 | -1.343475 | -1.646206 |
| H | 2.655982 | -4.682755 | -0.499677 |
| H | 4.712331 | -3.496958 | -1.305456 |
| C | 5.090052 | -0.805948 | -1.233396 |
| C | 2.835909 | 0.609236  | -0.149962 |
| H | 0.786303 | -3.317512 | 0.458418  |
| C | 3.990071 | 1.269970  | -0.587997 |
| C | 5.094048 | 0.566713  | -1.116443 |

|    |           |           |           |
|----|-----------|-----------|-----------|
| H  | 4.024248  | 2.347041  | -0.521685 |
| H  | 5.962356  | 1.134491  | -1.440226 |
| N  | 1.731349  | -1.516596 | 0.188266  |
| N  | 1.681416  | 1.189620  | 0.371333  |
| C  | 1.552475  | 2.545475  | 0.502417  |
| O  | 2.296709  | 3.434834  | 0.072030  |
| C  | -1.963395 | 2.414460  | 0.197361  |
| H  | -2.813066 | 2.737280  | -0.392299 |
| H  | -2.107350 | 1.582820  | 0.884057  |
| Cu | 0.225578  | -0.235170 | 0.947346  |
| Br | -1.117450 | -0.324619 | 2.904751  |
| O  | -1.162862 | -0.702017 | -0.794656 |
| C  | -1.939325 | 0.069850  | -1.362987 |
| O  | -3.254206 | -0.073963 | -1.469889 |
| C  | -3.980137 | -1.271463 | -0.956140 |
| C  | -1.446186 | 1.290019  | -2.061889 |
| C  | 0.262982  | 2.964200  | 1.255052  |
| H  | 0.495867  | 3.914791  | 1.746545  |
| H  | -0.014950 | 2.215477  | 1.999487  |
| C  | -0.848320 | 3.181505  | 0.282484  |
| H  | -0.730331 | 4.020085  | -0.403557 |
| C  | -2.359898 | 2.137022  | -2.860606 |
| H  | -2.000748 | 3.169163  | -2.899210 |
| H  | -2.307365 | 1.751345  | -3.893299 |
| H  | -3.397485 | 2.092098  | -2.535095 |
| C  | -0.000432 | 1.354630  | -2.300426 |
| H  | 0.564624  | 1.204173  | -1.370238 |
| H  | 0.274133  | 0.493296  | -2.930504 |
| H  | 0.297476  | 2.278759  | -2.796326 |
| C  | -3.390421 | -2.538378 | -1.575603 |
| H  | -4.041722 | -3.383304 | -1.332071 |
| H  | -3.343478 | -2.444743 | -2.665222 |
| H  | -2.391108 | -2.747019 | -1.192115 |
| C  | -5.400844 | -1.024502 | -1.455831 |
| H  | -5.428723 | -0.992200 | -2.549332 |
| H  | -6.053849 | -1.832725 | -1.114329 |
| H  | -5.787015 | -0.077486 | -1.066865 |
| C  | -3.909984 | -1.270323 | 0.566900  |
| H  | -4.334078 | -0.345276 | 0.969220  |
| H  | -4.497082 | -2.111724 | 0.949705  |
| H  | -2.884534 | -1.361129 | 0.924826  |

### TS1(open-shell)

Geometry with 54 atoms:

Total energy: -3921.370278370

|    |           |           |           |
|----|-----------|-----------|-----------|
| C  | 2.360989  | -3.705446 | -0.305518 |
| C  | 3.639630  | -3.233161 | -0.517341 |
| C  | 3.904850  | -1.841313 | -0.454376 |
| C  | 2.808395  | -0.979534 | -0.159924 |
| C  | 1.334594  | -2.782399 | -0.020791 |
| H  | 6.031320  | -1.929563 | -0.869376 |
| H  | 2.132129  | -4.764377 | -0.353673 |
| H  | 4.455282  | -3.916286 | -0.737773 |
| C  | 5.190395  | -1.276155 | -0.657637 |
| C  | 2.972541  | 0.449546  | -0.100384 |
| H  | 0.309904  | -3.103581 | 0.141571  |
| C  | 4.260304  | 0.952855  | -0.296459 |
| C  | 5.346460  | 0.091818  | -0.570883 |
| H  | 4.419832  | 2.020934  | -0.259502 |
| H  | 6.328874  | 0.531616  | -0.718800 |
| N  | 1.561577  | -1.480011 | 0.063255  |
| N  | 1.815540  | 1.182278  | 0.144739  |
| C  | 1.717549  | 2.512591  | -0.124197 |
| O  | 2.534175  | 3.200606  | -0.749548 |
| C  | -1.822946 | 2.475145  | -0.652932 |
| H  | -2.670684 | 2.832875  | -1.226648 |
| H  | -2.061153 | 1.941639  | 0.265666  |
| Cu | 0.249426  | -0.001655 | 0.661319  |
| Br | -0.764047 | 0.583289  | 2.756156  |
| O  | -1.342541 | -0.851619 | -0.392360 |
| C  | -2.141256 | -0.220684 | -1.119039 |
| O  | -3.456618 | -0.414013 | -1.088160 |
| C  | -4.123396 | -1.385686 | -0.182744 |
| C  | -1.737122 | 0.807609  | -2.088383 |
| C  | 0.406778  | 3.172477  | 0.363302  |
| H  | 0.684697  | 4.205208  | 0.605648  |
| H  | 0.039582  | 2.679291  | 1.264141  |
| C  | -0.647685 | 3.200654  | -0.694686 |
| H  | -0.451352 | 3.832462  | -1.559380 |
| C  | -2.758174 | 1.251042  | -3.105936 |
| H  | -2.423823 | 2.165827  | -3.603937 |
| H  | -2.859161 | 0.473013  | -3.876022 |
| H  | -3.744375 | 1.416987  | -2.670947 |
| C  | -0.328562 | 0.738784  | -2.613688 |
| H  | 0.411261  | 0.500939  | -1.852812 |
| H  | -0.281409 | -0.039294 | -3.388945 |
| H  | -0.049824 | 1.687413  | -3.079425 |
| C  | -3.574126 | -2.792678 | -0.422272 |

|   |           |           |           |
|---|-----------|-----------|-----------|
| H | -4.213464 | -3.514750 | 0.095144  |
| H | -3.586907 | -3.028825 | -1.491154 |
| H | -2.555228 | -2.896051 | -0.048427 |
| C | -5.581325 | -1.289177 | -0.627993 |
| H | -5.688776 | -1.594965 | -1.673330 |
| H | -6.199670 | -1.944454 | -0.007776 |
| H | -5.948410 | -0.263672 | -0.524193 |
| C | -3.950132 | -0.919859 | 1.259699  |
| H | -4.359891 | 0.087359  | 1.386376  |
| H | -4.496315 | -1.597988 | 1.923680  |
| H | -2.900682 | -0.903123 | 1.553834  |

TS2

Geometry with 54 atoms:

Total energy: -3921.448141950

|    |           |           |           |
|----|-----------|-----------|-----------|
| C  | 5.616918  | 1.038971  | 0.996937  |
| C  | 5.929627  | -0.298621 | 0.890750  |
| C  | 4.962596  | -1.222725 | 0.415366  |
| C  | 3.678156  | -0.707049 | 0.062833  |
| C  | 4.324147  | 1.461590  | 0.620628  |
| H  | 6.196609  | -3.001634 | 0.551645  |
| H  | 6.338332  | 1.763616  | 1.359501  |
| H  | 6.914504  | -0.664768 | 1.168639  |
| C  | 5.218960  | -2.611706 | 0.283807  |
| C  | 2.631338  | -1.578529 | -0.422645 |
| H  | 4.028367  | 2.506143  | 0.682249  |
| C  | 2.939252  | -2.936877 | -0.529521 |
| C  | 4.216319  | -3.434161 | -0.180759 |
| H  | 2.179892  | -3.614185 | -0.890425 |
| H  | 4.399197  | -4.500343 | -0.287025 |
| N  | 3.401759  | 0.624874  | 0.175424  |
| N  | 1.419000  | -0.959674 | -0.743550 |
| C  | 0.335270  | -1.644206 | -1.203412 |
| O  | 0.224012  | -2.861798 | -1.389641 |
| C  | -1.116448 | 0.347044  | -0.509313 |
| H  | -1.126690 | 1.377909  | -0.834555 |
| C  | -1.166616 | 0.083903  | 0.973940  |
| H  | -1.134174 | 1.046014  | 1.489415  |
| H  | -0.295789 | -0.496580 | 1.286682  |
| Cu | 1.375341  | 0.985993  | -0.410263 |
| O  | -3.167623 | 0.371180  | -0.630498 |
| C  | -3.507427 | -0.238537 | 0.398058  |
| O  | -4.734592 | -0.563872 | 0.703781  |
| C  | -5.917088 | -0.254108 | -0.174806 |

|    |           |           |           |
|----|-----------|-----------|-----------|
| C  | -2.450877 | -0.693068 | 1.391082  |
| C  | -0.852289 | -0.719568 | -1.535723 |
| H  | -1.735519 | -1.351589 | -1.648849 |
| H  | -0.662800 | -0.242637 | -2.502712 |
| Br | 0.876588  | 3.273001  | -0.270102 |
| C  | -7.065433 | -0.869711 | 0.616817  |
| H  | -7.144712 | -0.409515 | 1.606085  |
| H  | -8.003963 | -0.706450 | 0.079924  |
| H  | -6.916382 | -1.946525 | 0.739862  |
| C  | -5.732139 | -0.945450 | -1.522606 |
| H  | -4.919684 | -0.499353 | -2.097758 |
| H  | -5.528523 | -2.011195 | -1.380883 |
| H  | -6.658808 | -0.845425 | -2.095722 |
| C  | -6.059300 | 1.260644  | -0.288320 |
| H  | -6.097582 | 1.716242  | 0.705764  |
| H  | -5.235227 | 1.701078  | -0.852057 |
| H  | -6.995194 | 1.488223  | -0.807506 |
| C  | -2.283406 | -2.224651 | 1.266125  |
| H  | -1.557085 | -2.561287 | 2.011954  |
| H  | -3.235847 | -2.726751 | 1.457665  |
| H  | -1.920332 | -2.529041 | 0.281675  |
| C  | -2.855611 | -0.332688 | 2.829023  |
| H  | -3.065556 | 0.737019  | 2.926553  |
| H  | -3.745455 | -0.892086 | 3.129335  |
| H  | -2.038412 | -0.589151 | 3.509928  |

### TS3

Geometry with 54 atoms:

|               |                 |           |           |
|---------------|-----------------|-----------|-----------|
| Total energy: | -3921.425532160 |           |           |
| C             | -4.745633       | 0.322516  | -2.635498 |
| C             | -5.152716       | -0.891353 | -2.128878 |
| C             | -4.512741       | -1.435871 | -0.985476 |
| C             | -3.452625       | -0.680425 | -0.395665 |
| C             | -3.688936       | 1.001287  | -1.994007 |
| H             | -5.687690       | -3.254478 | -0.879291 |
| H             | -5.215729       | 0.761325  | -3.509068 |
| H             | -5.962228       | -1.447796 | -2.593830 |
| C             | -4.881545       | -2.685985 | -0.424899 |
| C             | -2.750814       | -1.177888 | 0.770049  |
| H             | -3.337770       | 1.959985  | -2.365474 |
| C             | -3.152108       | -2.417798 | 1.273579  |
| C             | -4.203863       | -3.151724 | 0.680437  |
| H             | -2.635621       | -2.814101 | 2.135557  |
| H             | -4.476350       | -4.109286 | 1.116788  |

|    |           |           |           |
|----|-----------|-----------|-----------|
| N  | -3.069950 | 0.523835  | -0.923359 |
| N  | -1.745209 | -0.353872 | 1.266093  |
| C  | -0.889053 | -0.733873 | 2.235401  |
| O  | -0.835801 | -1.809279 | 2.856278  |
| C  | 0.092538  | 0.387415  | 2.637578  |
| H  | -0.460468 | 1.153289  | 3.190653  |
| H  | 0.810491  | -0.043800 | 3.362447  |
| C  | 1.022488  | 1.066833  | 1.708192  |
| H  | 1.360008  | 2.018125  | 2.104137  |
| C  | 2.013070  | 0.531392  | 0.750065  |
| H  | 2.856116  | 0.381416  | 1.457830  |
| H  | 2.341760  | 1.375049  | 0.135940  |
| Cu | -1.485985 | 1.345874  | 0.177121  |
| Br | -0.093588 | 3.205328  | 0.240750  |
| O  | 3.264655  | -0.869712 | -2.155149 |
| C  | 3.210862  | -0.791546 | -0.942416 |
| O  | 4.270037  | -0.762618 | -0.121124 |
| C  | 5.665889  | -0.811144 | -0.616028 |
| C  | 1.894926  | -0.740902 | -0.129892 |
| C  | 0.721212  | -0.665661 | -1.112218 |
| H  | 0.812724  | -1.450784 | -1.866606 |
| H  | -0.219378 | -0.803229 | -0.579923 |
| H  | 0.691922  | 0.299280  | -1.627491 |
| C  | 1.840327  | -2.044422 | 0.696982  |
| H  | 2.679536  | -2.100626 | 1.395441  |
| H  | 0.911829  | -2.119998 | 1.263299  |
| H  | 1.896045  | -2.909216 | 0.026701  |
| C  | 6.475864  | -0.738756 | 0.676917  |
| H  | 7.545079  | -0.769161 | 0.447795  |
| H  | 6.261610  | 0.189916  | 1.215128  |
| H  | 6.235274  | -1.583440 | 1.329830  |
| C  | 5.938440  | 0.404612  | -1.502180 |
| H  | 7.005678  | 0.444090  | -1.742045 |
| H  | 5.371686  | 0.353479  | -2.432674 |
| H  | 5.670880  | 1.325300  | -0.973618 |
| C  | 5.905304  | -2.135880 | -1.340397 |
| H  | 5.632022  | -2.975926 | -0.693841 |
| H  | 5.323645  | -2.193490 | -2.261194 |
| H  | 6.967727  | -2.224576 | -1.588330 |

#### TS4

Geometry with 54 atoms:

Total energy: -3725.782638380

|   |           |          |          |
|---|-----------|----------|----------|
| C | -5.401640 | 0.319342 | 2.419270 |
|---|-----------|----------|----------|

|    |           |           |           |
|----|-----------|-----------|-----------|
| C  | -5.728153 | 0.968017  | 1.249786  |
| C  | -4.984044 | 0.704142  | 0.070211  |
| C  | -3.921164 | -0.241585 | 0.174055  |
| C  | -4.326286 | -0.601168 | 2.412714  |
| H  | -6.057350 | 2.047466  | -1.249232 |
| H  | -5.948931 | 0.499947  | 3.338546  |
| H  | -6.546499 | 1.681980  | 1.212319  |
| C  | -5.244963 | 1.330107  | -1.177382 |
| C  | -3.128490 | -0.536969 | -0.986154 |
| H  | -4.053967 | -1.122885 | 3.328252  |
| C  | -3.407301 | 0.087117  | -2.189319 |
| C  | -4.469028 | 1.020211  | -2.272271 |
| H  | -2.810600 | -0.137680 | -3.062290 |
| H  | -4.665107 | 1.496150  | -3.228490 |
| N  | -3.609470 | -0.878175 | 1.337581  |
| C  | -1.129891 | -1.862906 | -1.634589 |
| O  | -1.029074 | -1.547277 | -2.807666 |
| C  | -0.077196 | -2.813162 | -0.951742 |
| H  | -0.541387 | -3.396846 | -0.154486 |
| H  | 0.289733  | -3.454310 | -1.758372 |
| C  | 1.314469  | -1.713850 | 0.915911  |
| H  | 2.438502  | -1.934617 | 0.873557  |
| H  | 0.771845  | -2.375830 | 1.593619  |
| O  | 0.905975  | 0.615848  | -0.746745 |
| C  | 1.503225  | 0.733857  | 0.318812  |
| O  | 2.332878  | 1.712530  | 0.631539  |
| C  | 2.754007  | 2.743220  | -0.357322 |
| C  | 1.251336  | -0.237125 | 1.480504  |
| C  | 0.982933  | -1.934029 | -0.458937 |
| H  | 1.636096  | -1.491031 | -1.204068 |
| Br | 4.483142  | -1.463450 | 0.004063  |
| N  | -2.092410 | -1.456395 | -0.768245 |
| H  | -2.070473 | -1.806060 | 0.187374  |
| C  | 2.229882  | -0.082848 | 2.645309  |
| H  | 3.256779  | -0.242556 | 2.309501  |
| H  | 2.147549  | 0.917060  | 3.078735  |
| H  | 1.988991  | -0.815208 | 3.423202  |
| C  | -0.193736 | 0.036236  | 1.949789  |
| H  | -0.901113 | -0.059768 | 1.125569  |
| H  | -0.473230 | -0.666206 | 2.740696  |
| H  | -0.266851 | 1.052575  | 2.352251  |
| C  | 3.799709  | 3.531154  | 0.428174  |
| H  | 4.641986  | 2.887531  | 0.699522  |
| H  | 4.174179  | 4.357688  | -0.182595 |



|   |          |          |           |
|---|----------|----------|-----------|
| H | 3.365571 | 3.944024 | 1.344021  |
| C | 3.381995 | 2.057927 | -1.571454 |
| H | 4.080709 | 1.282049 | -1.241702 |
| H | 2.624633 | 1.593369 | -2.204291 |
| H | 3.921670 | 2.805589 | -2.161547 |
| C | 1.551430 | 3.614706 | -0.713954 |
| H | 0.788920 | 3.035907 | -1.237687 |
| H | 1.110983 | 4.049684 | 0.188960  |
| H | 1.879763 | 4.431556 | -1.364399 |

### <sup>1</sup>BuBr

Geometry with 14 atoms:

Total energy: -2732.027900020

|    |           |           |           |
|----|-----------|-----------|-----------|
| Br | -1.187267 | -0.000026 | -0.000142 |
| C  | 0.871075  | -0.000005 | 0.000078  |
| C  | 1.304124  | -0.103389 | -1.456848 |
| H  | 0.944439  | 0.746074  | -2.043505 |
| H  | 2.401091  | -0.105884 | -1.493152 |
| H  | 0.944675  | -1.027270 | -1.917650 |
| C  | 1.303245  | 1.313674  | 0.639088  |
| H  | 0.942540  | 1.397003  | 1.667644  |
| H  | 2.400147  | 1.346632  | 0.656186  |
| H  | 0.943803  | 2.174337  | 0.068883  |
| C  | 1.303343  | -1.210198 | 0.818226  |
| H  | 2.400253  | -1.240045 | 0.840096  |
| H  | 0.942316  | -1.147557 | 1.848151  |
| H  | 0.944370  | -2.142866 | 0.375058  |

## 5. Characterization Data of Products 3

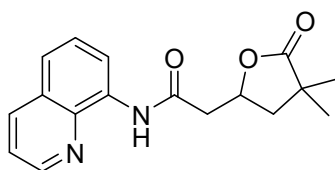

**3aa**

2-(4,4-dimethyl-5-oxotetrahydrofuran-2-yl)-N-(quinolin-8-yl) acetamide (**3aa**): light yellow solid (hexane/EtOAc = 2/1, yield: 81%), mp 170-175 °C; <sup>1</sup>H NMR (400 MHz, CDCl<sub>3</sub>) δ 9.96 (s, 1H), 8.81 (dd, *J* = 4.24 Hz, 1.64 Hz, 1H), 8.75-8.70 (m, 1H), 8.16 (dd, *J* = 8.28 Hz, 1.64 Hz, 1H), 7.55-7.51 (m, 2H), 7.47-7.44 (m, 1H), 5.07-5.00 (m, 1H), 3.05 (dd, *J* = 15.08 Hz, 7.00 Hz, 1H), 2.86 (dd, *J* = 15.06 Hz, 5.73 Hz, 1H), 2.39 (dd, *J* = 12.81 Hz, 5.89 Hz, 1H), 1.95 (dd, *J* = 12.80 Hz, 10.20 Hz, 1H), 1.30 (s, 6H); <sup>13</sup>C NMR (100 MHz, CDCl<sub>3</sub>) δ 181.3, 167.2, 148.3, 138.2, 136.4, 134.0, 127.9, 127.2, 122.0, 121.7, 116.7, 73.4, 43.7, 43.2, 40.4, 24.9, 24.3; HRMS (ESI) calcd for C<sub>17</sub>H<sub>19</sub>N<sub>2</sub>O<sub>3</sub><sup>+</sup> ([M + H]<sup>+</sup>): 299.1390, found: 299.1387.

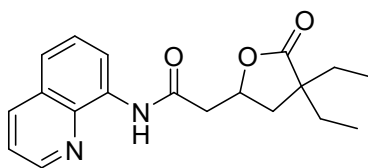

**3ab**

2-(4,4-diethyl-5-oxotetrahydrofuran-2-yl)-N-(quinolin-8-yl) acetamide (**3ab**): light yellow solid (hexane/EtOAc = 3/1, yield: 45%), mp 107-109 °C; <sup>1</sup>H NMR (400 MHz, CDCl<sub>3</sub>) δ 9.96 (s, 1H), 8.82 (dd, *J* = 4.16 Hz, 1.56 Hz, 1H), 8.75-8.71 (m, 1H), 8.16 (dd, *J* = 8.27 Hz, 1.56 Hz, 1H), 7.56-7.51 (m, 2H), 7.48-7.46 (m, 1H), 5.03-4.96 (m, 1H), 3.05 (dd, *J* = 15.06 Hz, 6.72 Hz, 1H), 2.85 (dd, *J* = 15.04 Hz, 6.04 Hz, 1H), 2.35 (dd, *J* = 13.26 Hz, 6.72 Hz, 1H), 2.01 (dd, *J* = 13.20 Hz, 9.56 Hz, 1H), 1.71-1.62 (m, 4H), 0.98 (t, *J* = 7.45 Hz, 3H), 0.91 (t, *J* = 7.40 Hz, 3H); <sup>13</sup>C NMR (100 MHz, CDCl<sub>3</sub>) δ 180.2, 167.3, 148.3, 138.2, 136.3, 134.0, 127.9, 127.2, 121.9, 121.7, 116.6, 73.6, 48.6, 44.2, 37.6, 29.0, 28.2, 8.7, 8.6; HRMS (ESI) calcd for C<sub>19</sub>H<sub>23</sub>N<sub>2</sub>O<sub>3</sub><sup>+</sup> ([M + H]<sup>+</sup>): 327.1703, found: 327.1703.

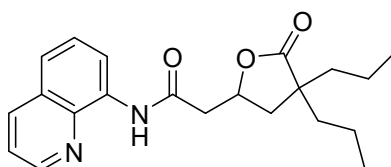

**3ac**

2-(5-oxo-4,4-dipropyltetrahydrofuran-2-yl)-N-(quinolin-8-yl) acetamide (**3ac**): light yellow solid (hexane/EtOAc = 5/1, yield: 42%), mp 85-89 °C; <sup>1</sup>H NMR (400 MHz, CDCl<sub>3</sub>) δ 9.95 (s, 1H), 8.81 (dd, *J* = 4.24 Hz, 1.60 Hz, 1H), 8.75-8.71 (m, 1H), 8.16 (dd, *J* = 8.28 Hz, 1.60 Hz, 1H), 7.56-7.51 (m, 2H), 7.48-7.45 (m, 1H), 5.03-4.95 (m, 1H), 3.04 (dd, *J* = 15.05 Hz, 6.66 Hz, 1H), 2.84 (dd, *J* = 15.00 Hz, 6.00 Hz, 1H), 2.37 (dd, *J* = 13.26 Hz, 6.70 Hz, 1H), 2.01 (dd, *J* = 13.21 Hz, 9.60 Hz, 1H), 1.65-1.53 (m, 4H), 1.47-1.30 (m, 3H), 1.25-1.13 (m, 1H), 0.94-0.89 (m, 6H); <sup>13</sup>C NMR (100 MHz, CDCl<sub>3</sub>) δ 180.4, 167.3, 148.3, 138.2, 136.3, 134.0, 127.9, 127.2, 121.9, 121.7, 116.7, 73.7, 48.0, 44.1, 39.0, 38.5, 38.3, 17.6, 14.4, 14.3; HRMS (ESI) calcd for C<sub>21</sub>H<sub>27</sub>N<sub>2</sub>O<sub>3</sub><sup>+</sup> ([M + H]<sup>+</sup>): 355.2016, found: 355.2016.

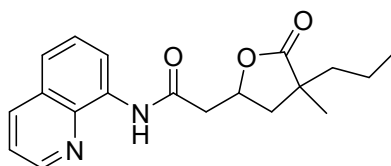

**3ad**

2-(4-methyl-5-oxo-4-propyltetrahydrofuran-2-yl)-N-(quinolin-8-yl) acetamide (**3ad**): brown yellow oil (hexane/EtOAc = 3/1, yield: 40%); <sup>1</sup>H NMR (400 MHz, CDCl<sub>3</sub>) δ 9.96 (s, 1H), 8.82-8.81 (m, 1H), 8.75-8.71 (m, 1H), 8.16 (dd, *J* = 8.24 Hz, 1.16 Hz, 1H), 7.56-7.52 (m, 2H), 7.48-7.45 (m, 1H), 5.06-4.97 (m, 1H), 3.08-3.02 (m, 1H), 2.88-2.82 (m, 1H), 2.54-2.24 (m, 1H), 2.04-1.86 (m, 1H), 1.62-1.33 (m, 4H), 1.28-1.27 (m, 3H), 0.95-0.91 (m, 3H); <sup>13</sup>C NMR (100 MHz, CDCl<sub>3</sub>) δ

181.0, 180.9, 167.3, 167.2, 148.3, 138.2, 136.3, 134.0, 127.9, 127.2, 121.9, 121.7, 116.7, 73.6, 73.5, 44.1, 44.1, 44.0, 43.7, 41.3, 40.3, 39.8, 39.7, 23.4, 22.5, 17.7, 17.7, 14.3, 14.3; HRMS (ESI) calcd for  $C_{19}H_{23}N_2O_3^+$  ( $[M + H]^+$ ): 327.1703, found: 327.1703.

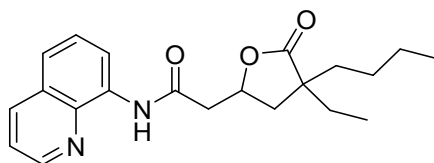

**3ae**

2-(4-butyl-4-methyl-5-oxotetrahydrofuran-2-yl)-N-(quinolin-8-yl)acetamide (**3ae**): yellow oil (hexane/EtOAc = 5/1, yield: 38%);  $^1H$  NMR (400 MHz,  $CDCl_3$ )  $\delta$  9.96 (s, 1H), 8.82-8.81 (m, 1H), 8.75-8.71 (m, 1H), 8.16 (dd,  $J$  = 8.28 Hz, 1.60 Hz, 1H), 7.56-7.51 (m, 2H), 7.48-7.45 (m, 1H), 5.04-4.95 (m, 1H), 3.07-3.01 (m, 1H), 2.89-2.82 (m, 1H), 2.36 (dd,  $J$  = 13.24 Hz, 6.72 Hz, 1H), 2.05-1.98 (m, 1H), 1.72-1.50 (m, 4H), 1.34-1.25 (m, 4H), 1.00-0.84 (m, 6H);  $^{13}C$  NMR (100 MHz,  $CDCl_3$ )  $\delta$  180.4, 180.3, 167.3, 148.3, 138.2, 136.3, 134.0, 127.9, 127.2, 121.9, 121.7, 116.7, 73.6, 48.3, 48.2, 44.1, 38.1, 37.9, 36.2, 35.2, 29.4, 28.8, 26.5, 26.4, 23.0, 23.0, 13.9, 8.7, 8.7; HRMS (ESI) calcd for  $C_{21}H_{27}N_2O_3^+$  ( $[M + H]^+$ ): 355.2016, found: 355.2016.

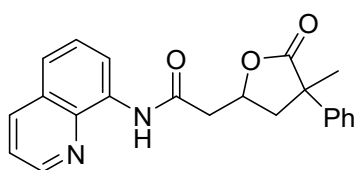

**3af**

2-(4-methyl-5-oxo-4-phenyltetrahydrofuran-2-yl)-N-(quinolin-8-yl)acetamide (**3af**): light yellow solid (hexane/EtOAc = 2/1, yield: 43%,  $dr$  = 2:1.1), mp 173-175 °C;  $^1H$  NMR (400 MHz,  $CDCl_3$ )  $\delta$  9.97 (s, 0.55H), 9.90 (s, 1H), 8.82-8.79 (m, 1.55H), 8.75-8.68 (m, 1.55H), 8.17 (dd,  $J$  = 8.24 Hz, 1.52 Hz, 1.55H), 7.54-7.45 (m, 6.48H), 7.42-7.39 (m, 1.10H), 7.38-7.34 (m, 3.10H), 7.30-7.28 (m, 1.55H), 5.21-5.14 (m, 1H), 4.85-4.78 (m, 0.55H), 3.10-3.00 (m, 2.10H), 2.89 (dd,  $J$  = 15.09 Hz, 5.84 Hz, 0.55H), 2.80 (dd,  $J$  = 15.06 Hz, 6.45 Hz, 1H), 2.74 (dd,  $J$  = 13.04 Hz, 6.32 Hz, 1H), 2.57 (dd,  $J$  = 12.99 Hz, 8.60 Hz, 1H), 2.25-2.19 (m, 0.55H), 1.69 (s, 3H), 1.69 (s, 1.65H);  $^{13}C$  NMR (100 MHz,  $CDCl_3$ )  $\delta$  178.9, 167.1, 148.3, 142.3, 140.3, 138.2, 136.4, 134.0, 129.0, 128.7, 127.9, 127.2, 126.0, 125.7, 122.0, 121.7, 116.7, 73.6, 48.0, 43.6, 43.3, 25.5; HRMS (ESI) calcd for  $C_{22}H_{21}N_2O_3^+$  ( $[M + H]^+$ ): 361.1547, found: 361.1547.

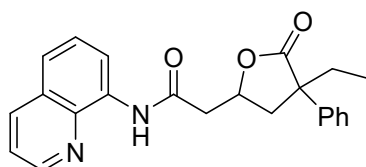

**3ag**

2-(4-ethyl-5-oxo-4-phenyltetrahydrofuran-2-yl)-N-(quinolin-8-yl)acetamide (**3ag**): light yellow oil (hexane/EtOAc = 4/1, yield: 51%,  $dr$  = 5:3);  $^1H$  NMR (400 MHz,  $CDCl_3$ )  $\delta$  9.96 (s, 0.60H), 9.86 (s,

1H), 8.82-8.78 (m,  $J = 4.20$  Hz, 1.52 Hz, 0.60H), 8.79 (dd,  $J = 4.20$  Hz, 1.56 Hz, 1H), 8.75-8.69 (m, 1.6H), 8.17-8.15 (m, 1.6H), 7.56-7.44 (m, 8H), 7.38-7.34 (m, 3.20H), 7.30-7.27 (m, 1.60H), 5.17-5.10 (m, 1H), 4.87-4.80 (m, 0.60 H), 3.11-2.98 (m, 2.20H), 2.93-2.81(m, 1.60H), 2.74 (dd,  $J = 15.00$  Hz, 6.77 Hz, 1H), 2.56 (dd,  $J = 13.21$  Hz, 7.89 Hz, 1H), 2.21 (dd,  $J = 13.02$  Hz, 10.97 Hz, 0.60H), 2.10-1.87 (m, 3.20H), 0.88-0.81 (m, 4.80H);  $^{13}\text{C}$  NMR (100 MHz,  $\text{CDCl}_3$ )  $\delta$  178.1, 167.2, 148.3, 140.7, 138.2, 136.3, 134.0, 128.9, 128.5, 127.9, 127.2, 127.1, 126.5, 126.4, 122.0, 121.7, 116.7, 73.6, 51.8, 43.6, 40.0, 32.5, 9.0; HRMS (ESI) calcd for  $\text{C}_{23}\text{H}_{23}\text{N}_2\text{O}_3^+$  ( $[\text{M} + \text{H}]^+$ ) : 375.1703, found: 375.1703.

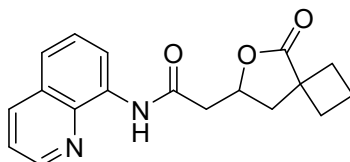

**3ah**

2-(5-oxo-6-oxaspiro[3.4]octan-7-yl)-N-(quinolin-8-yl)acetamide (**3ah**): yellow solid (hexane/EtOAc = 2/1, yield: 57%), mp 168-170 °C;  $^1\text{H}$  NMR (400 MHz,  $\text{CDCl}_3$ )  $\delta$  9.94 (s, 1H), 8.80 (dd,  $J = 4.20$  Hz, 1.60 Hz, 1H), 8.75-8.70 (m, 1H), 8.16 (dd,  $J = 8.29$  Hz, 1.64 Hz, 1H), 7.55-7.51 (m, 2H), 7.47-7.44 (m, 1H), 4.96-4.90 (m, 1H), 3.02 (dd,  $J = 15.07$  Hz, 6.81 Hz, 1H), 2.82 (dd,  $J = 15.04$  Hz, 6.11 Hz, 1H), 2.69 (dd,  $J = 13.00$  Hz, 6.04 Hz, 1H), 2.63-2.55 (m, 1H), 2.51-2.43 (m, 1H), 2.18-2.10 (m, 3H), 2.08-1.99 (m, 2H);  $^{13}\text{C}$  NMR (100 MHz,  $\text{CDCl}_3$ )  $\delta$  180.3, 167.2, 148.3, 138.2, 136.3, 134.0, 127.9, 127.2, 121.9, 121.7, 116.6, 73.8, 44.3, 43.4, 41.7, 31.7, 29.2, 16.5; HRMS (ESI) calcd for  $\text{C}_{18}\text{H}_{19}\text{N}_2\text{O}_3^+$  ( $[\text{M} + \text{H}]^+$ ) : 311.1390, found: 311.1390.

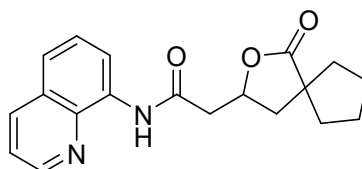

**3ai**

2-(1-oxo-2-oxaspiro[4.4]nonan-3-yl)-N-(quinolin-8-yl)acetamide (**3ai**): yellow oil (hexane/EtOAc = 3/1, yield: 37%);  $^1\text{H}$  NMR (400 MHz,  $\text{CDCl}_3$ )  $\delta$  9.96 (s, 1H), 8.81 (dd,  $J = 4.08$  Hz, 1.32 Hz, 1H), 8.74-8.72 (m, 1H), 8.17 (dd,  $J = 8.27$  Hz, 1.28 Hz, 1H), 7.56-7.52 (m, 2H), 7.48-7.45 (m, 1H), 5.02-4.95 (m, 1H), 3.08 (dd,  $J = 15.06$  Hz, 6.88 Hz, 1H), 2.86 (dd,  $J = 15.02$  Hz, 5.92 Hz, 1H), 2.45 (dd,  $J = 12.73$  Hz, 5.81 Hz, 1H), 2.22-2.17 (m, 1H), 2.00-1.79 (m, 5H), 1.70-1.61 (m, 3H);  $^{13}\text{C}$  NMR (100 MHz,  $\text{CDCl}_3$ )  $\delta$  181.8, 167.3, 148.3, 138.2, 136.4, 134.0, 127.9, 127.2, 121.9, 121.7, 116.7, 74.1, 50.1, 43.5, 43.0, 37.3, 36.7, 25.5, 25.4; HRMS (ESI) calcd for  $\text{C}_{19}\text{H}_{21}\text{N}_2\text{O}_3^+$  ( $[\text{M} + \text{H}]^+$ ) : 325.1547, found: 325.1547.

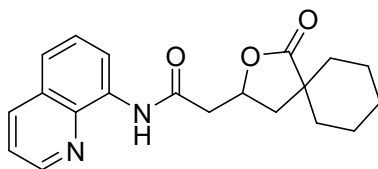

**3aj**

2-(1-oxo-2-oxaspiro[4.5]decan-3-yl)-N-(quinolin-8-yl)acetamide (**3aj**): light yellow solid (hexane/EtOAc = 3/1, yield: 45%), mp 181-184 °C; <sup>1</sup>H NMR (400 MHz, CDCl<sub>3</sub>) δ 9.96 (s, 1H), 8.81 (dd, *J* = 4.16 Hz, 1.52 Hz, 1H), 8.75-8.71 (m, 1H), 8.16 (dd, *J* = 8.28 Hz, 1.52 Hz, 1H), 7.55-7.51 (m, 2H), 7.47-7.44 (m, 1H), 5.03-4.96 (m, 1H), 3.06 (dd, *J* = 15.09 Hz, 6.72 Hz, 1H), 2.86 (dd, *J* = 15.06 Hz, 5.99 Hz, 1H), 2.61 (dd, *J* = 13.01 Hz, 6.20 Hz, 1H), 1.89-1.57 (m, 7H), 1.54-1.50 (m, 1H), 1.47-1.21 (m, 3H); <sup>13</sup>C NMR (100 MHz, CDCl<sub>3</sub>) δ 180.9, 167.3, 148.3, 138.2, 136.3, 134.0, 127.9, 127.2, 121.9, 121.7, 116.7, 73.7, 44.9, 43.9, 39.4, 34.3, 31.4, 25.2, 22.1, 22.0; HRMS (ESI) calcd for C<sub>20</sub>H<sub>23</sub>N<sub>2</sub>O<sub>3</sub><sup>+</sup> ([M + H]<sup>+</sup>) : 339.1703, found: 339.1703.

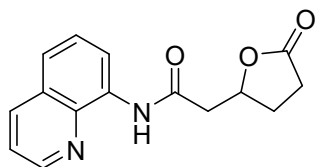

**3ak**

2-(5-oxotetrahydrofuran-2-yl)-N-(quinolin-8-yl)acetamide (**3ak**): white solid (hexane/EtOAc = 1/1, yield: 24%), mp 115-120 °C; <sup>1</sup>H NMR (400 MHz, CDCl<sub>3</sub>) δ 9.95 (s, 1H), 8.81 (dd, *J* = 4.24 Hz, 1.64 Hz, 1H), 8.75-8.70 (m, 1H), 8.17 (dd, *J* = 8.28 Hz, 1.60 Hz, 1H), 7.56-7.52 (m, 2H), 7.48-7.45 (m, 1H), 5.13-5.06 (m, 1H), 3.07 (dd, *J* = 15.14 Hz, 6.59 Hz, 1H), 2.90 (dd, *J* = 15.16 Hz, 6.11 Hz, 1H), 2.64-2.51 (m, 3H), 2.16-2.07 (m, 1H); <sup>13</sup>C NMR (100 MHz, CDCl<sub>3</sub>) δ 176.5, 167.1, 148.3, 138.2, 136.4, 134.0, 127.9, 127.3, 122.0, 121.7, 116.7, 43.4, 28.6, 27.8; HRMS (ESI) calcd for C<sub>15</sub>H<sub>15</sub>N<sub>2</sub>O<sub>3</sub><sup>+</sup> ([M + H]<sup>+</sup>) : 271.1077, found: 271.1076.

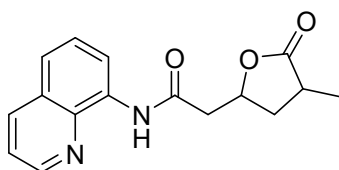

**3al**

2-(4-methyl-5-oxotetrahydrofuran-2-yl)-N-(quinolin-8-yl)acetamide (**3al**): white solid (hexane/EtOAc = 2/1, yield: 34%), mp 153-155 °C; <sup>1</sup>H NMR (400 MHz, CDCl<sub>3</sub>) δ 9.96-9.93 (m, 1H), 8.81-8.80 (m, 1H), 8.73-8.71 (m, 1H), 8.18-8.15 (m, 1H), 7.56-7.51 (m, 2H), 7.48-7.45 (m, 1H), 5.16-4.91 (m, 1H), 3.08-3.00 (m, 1H), 2.91-2.69 (m, 2.4H), 2.42-2.35 (m, 0.6H), 2.24-2.17 (m, 0.6H), 1.79-1.68 (m, 0.6H), 1.35-1.39 (m, 3H); <sup>13</sup>C NMR (100 MHz, CDCl<sub>3</sub>) δ 179.4, 178.8, 167.1, 148.3, 138.29, 138.26, 136.4, 136.3, 134.07, 134.01, 127.9, 127.2, 122.0, 121.9, 121.7, 116.7, 74.8, 74.7, 43.5, 43.2, 37.1, 35.8, 35.2, 33.9, 15.8, 15.0; HRMS (ESI) calcd for C<sub>16</sub>H<sub>17</sub>N<sub>2</sub>O<sub>3</sub><sup>+</sup> ([M + H]<sup>+</sup>) : 285.1234, found: 285.1233.

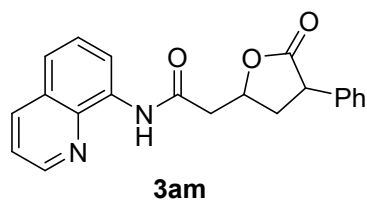

2-(5-oxo-4-phenyltetrahydrofuran-2-yl)-N-(quinolin-8-yl)acetamide (**3am**): light yellow oil (hexane/EtOAc = 1/1, yield: 33%);  $^1\text{H}$  NMR (400 MHz,  $\text{CDCl}_3$ )  $\delta$  9.99-9.97 (m, 1H), 8.81-8.72 (m, 2H), 8.16-8.14 (m, 1H), 7.55-7.52 (m, 2H), 7.47-7.43 (m, 1H), 7.37-7.27 (m, 5H), 5.27-5.06 (m, 1H), 4.02-3.92 (m, 1H), 3.16-3.07 (m, 1H), 3.01-2.91 (m, 1.5H), 2.74-2.61 (m, 1H), 2.32-2.26 (m, 0.4H);  $^{13}\text{C}$  NMR (100 MHz,  $\text{CDCl}_3$ )  $\delta$  176.7, 176.1, 167.09, 167.03, 148.3, 138.27, 136.7, 136.42, 136.40, 136.1, 134.05, 134.0, 129.0, 128.8, 128.1, 127.9, 127.7, 127.6, 127.5, 127.2, 122.08, 122.05, 121.7, 116.7, 75.3, 74.8, 46.9, 45.4, 43.2, 43.1, 37.6, 36.0; HRMS (ESI) calcd for  $\text{C}_{21}\text{H}_{19}\text{N}_2\text{O}_3^+$  ( $[\text{M} + \text{H}]^+$ ): 347.1390, found: 347.1403.

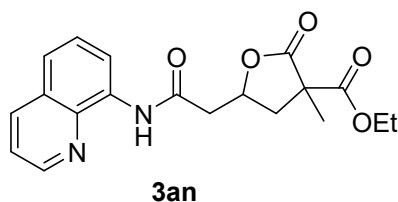

ethyl 3-methyl-2-oxo-5-(2-oxo-2-(quinolin-8-ylamino)ethyl)tetrahydrofuran-3-carboxylate (**3an**): light yellow solid (hexane/EtOAc = 2/1, yield: 53%), mp 101-103 °C;  $^1\text{H}$  NMR (400 MHz,  $\text{CDCl}_3$ )  $\delta$  9.97 (s, 1H), 8.82 (dd,  $J = 4.20$  Hz, 1.64 Hz, 1H), 8.75-8.70 (m, 1H), 8.18 (dd,  $J = 8.28$  Hz, 1.64 Hz, 1H), 7.55-7.52 (m, 2H), 7.49-7.46 (m, 1H), 5.18-5.11 (m, 1H), 4.25 (q,  $J = 7.12$  Hz, 2H), 3.17 (dd,  $J = 15.21$  Hz, 6.85 Hz, 1H), 2.96 (dd,  $J = 15.16$  Hz, 6.32 Hz, 1H), 2.70 (dd,  $J = 13.21$  Hz, 8.34 Hz, 1H), 2.48 (dd,  $J = 13.24$  Hz, 6.80 Hz, 1H), 1.58 (s, 3H), 1.29 (t,  $J = 7.12$  Hz, 3H);  $^{13}\text{C}$  NMR (100 MHz,  $\text{CDCl}_3$ )  $\delta$  175.0, 170.5, 166.9, 148.3, 138.2, 136.4, 133.9, 127.9, 127.2, 122.0, 121.7, 116.6, 74.4, 62.3, 51.1, 43.3, 39.9, 20.0, 13.9; HRMS (ESI) calcd for  $\text{C}_{19}\text{H}_{21}\text{N}_2\text{O}_5^+$  ( $[\text{M} + \text{H}]^+$ ): 357.1445, found: 357.1445.

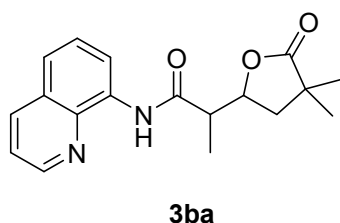

2-(4,4-dimethyl-5-oxotetrahydrofuran-2-yl)-N-(quinolin-8-yl)propenamide (**3ba**): light yellow solid (hexane/EtOAc = 4/1, yield: 71%), mp 83-87 °C;  $^1\text{H}$  NMR (400 MHz,  $\text{CDCl}_3$ )  $\delta$  10.0 (s, 1H), 8.82 (dd,  $J = 4.20$  Hz, 1.60 Hz, 1H), 8.74-8.70 (m, 1H), 8.17 (dd,  $J = 8.24$  Hz, 1.56 Hz, 1H), 7.56-7.51 (m, 2H), 7.49-7.45 (m, 1H), 4.72-4.66 (m, 1H), 2.90-2.83 (m, 1H), 2.30 (dd,  $J = 12.84$  Hz, 5.89 Hz, 1H), 1.99 (dd,  $J = 12.81$  Hz, 10.18 Hz, 1H), 1.52 (d,  $J = 6.88$  Hz, 3H), 1.28 (s, 3H), 1.25 (s, 3H);  $^{13}\text{C}$  NMR (100 MHz,  $\text{CDCl}_3$ )  $\delta$  181.4, 171.0, 148.4, 138.3, 136.4, 134.0, 127.9, 127.2, 122.0, 121.7, 116.7, 78.2, 47.8, 41.4, 40.4, 24.9, 24.4, 15.1; HRMS (ESI) calcd for  $\text{C}_{18}\text{H}_{21}\text{N}_2\text{O}_3^+$  ( $[\text{M} +$

$[H]^+$ ) : 313.1547, found: 313.1547.

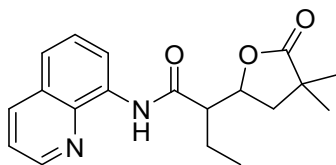

**3ca**

2-(4,4-dimethyl-5-oxotetrahydrofuran-2-yl)-N-(quinolin-8-yl) butanamide (**3ca**): light yellow solid (hexane/EtOAc = 3/1, yield: 70%), mp 76-80 °C;  $^1H$  NMR (400 MHz,  $CDCl_3$ )  $\delta$  9.97 (s, 1H), 8.83 (dd,  $J$  = 4.24 Hz, 1.64 Hz, 1H), 8.77-8.73 (m, 1H), 8.18 (dd,  $J$  = 8.24 Hz, 1.64 Hz, 1H), 7.55-7.53 (m, 2H), 7.49-7.46 (m, 1H), 4.72-4.66 (m, 1H), 2.67 (td,  $J$  = 8.74 Hz, 4.94 Hz, 1H), 2.27 (dd,  $J$  = 12.79 Hz, 5.79 Hz, 1H), 2.00-1.95 (m, 3H), 1.27 (s, 3H), 1.25 (s, 3H), 1.07 (t,  $J$  = 7.45 Hz, 3H);  $^{13}C$  NMR (100 MHz,  $CDCl_3$ )  $\delta$  181.5, 170.2, 148.6, 138.3, 136.4, 133.9, 127.9, 127.2, 122.0, 121.8, 116.6, 55.7, 41.6, 40.3, 24.9, 24.3, 23.4, 11.6; HRMS (ESI) calcd for  $C_{19}H_{23}N_2O_3^+$  ( $[M + H]^+$ ) : 327.1703, found: 327.1701.

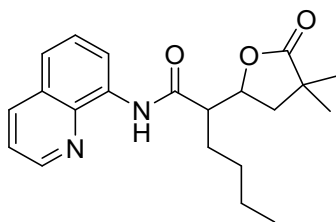

**3da**

2-(4,4-dimethyl-5-oxotetrahydrofuran-2-yl)-N-(quinolin-8-yl) hexanamide (**3da**): light yellow oil (hexane/EtOAc = 4/1, yield: 74%);  $^1H$  NMR (400 MHz,  $CDCl_3$ )  $\delta$  9.97 (s, 1H), 8.83 (dd,  $J$  = 4.20 Hz, 1.64 Hz, 1H), 8.77-8.72 (m, 1H), 8.18 (dd,  $J$  = 8.28 Hz, 1.64 Hz, 1H), 7.56-7.53 (m, 2H), 7.49-7.46 (m, 1H), 4.71-4.65 (m, 1H), 2.75-2.69 (m, 1H), 2.26 (dd,  $J$  = 12.79 Hz, 5.81 Hz, 1H), 2.07-1.91 (m, 3H), 1.47-1.34 (m, 4H), 1.26 (s, 3H), 1.25 (s, 3H), 0.88 (t,  $J$  = 6.96 Hz, 3H);  $^{13}C$  NMR (100 MHz,  $CDCl_3$ )  $\delta$  181.5, 170.4, 148.4, 138.3, 136.4, 133.9, 127.9, 127.2, 122.0, 121.8, 116.6, 54.2, 41.5, 40.3, 29.9, 29.3, 24.9, 24.3, 22.7, 13.8; HRMS (ESI) calcd for  $C_{21}H_{27}N_2O_3^+$  ( $[M + H]^+$ ) : 355.2016, found: 355.2020.

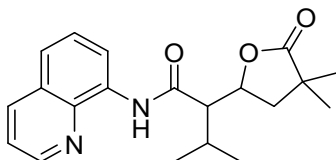

**3ea**

2-(4,4-dimethyl-5-oxotetrahydrofuran-2-yl)-3-methyl-N-(quinolin-8-yl) butanamide (**3ea**): light yellow solid (hexane/EtOAc = 4/1, yield: 70%), mp 129-133 °C;  $^1H$  NMR (400 MHz,  $CDCl_3$ )  $\delta$  9.89 (s, 1H), 8.82 (dd,  $J$  = 4.24 Hz, 1.64 Hz, 1H), 8.76-8.71 (m, 1H), 8.17 (dd,  $J$  = 8.28 Hz, 1.64 Hz, 1H), 7.56-7.50 (m, 2H), 7.48-7.45 (m, 1H), 4.88-4.82 (m, 1H), 2.63 (dd,  $J$  = 8.56 Hz, 6.07 Hz, 1H), 2.42-2.35 (m, 1H), 2.30 (dd,  $J$  = 12.77 Hz, 5.81 Hz, 1H), 2.09 (dd,  $J$  = 12.75 Hz, 10.21 Hz,

1H), 1.28 (s, 3H), 1.25 (s, 3H), 1.18 (d,  $J = 6.97$  Hz, 3H), 1.11 (d,  $J = 6.80$  Hz, 3H);  $^{13}\text{C}$  NMR (100 MHz,  $\text{CDCl}_3$ )  $\delta$  181.6, 169.5, 148.4, 138.3, 136.3, 133.9, 127.9, 127.2, 121.9, 121.7, 116.5, 75.9, 59.7, 41.5, 40.0, 28.7, 24.9, 24.4, 21.3, 19.1; HRMS (ESI) calcd for  $\text{C}_{20}\text{H}_{25}\text{N}_2\text{O}_3^+$  ( $[\text{M} + \text{H}]^+$ ) : 341.1860, found: 341.1864.

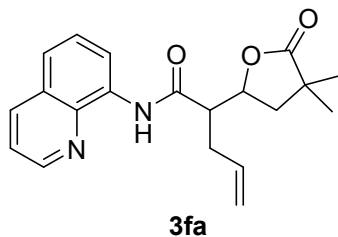

**3fa**

2-(4,4-dimethyl-5-oxotetrahydrofuran-2-yl)-N-(quinolin-8-yl)pent-4-enamide (**3fa**): light yellow oil (hexane/EtOAc = 4/1, yield: 55%), mp 107-109 °C;  $^1\text{H}$  NMR (400 MHz,  $\text{CDCl}_3$ )  $\delta$  9.95 (s, 1H), 8.82 (dd,  $J = 4.20$  Hz, 1.60 Hz, 1H), 8.73-8.71 (m, 1H), 8.17 (dd,  $J = 8.28$  Hz, 1.59 Hz, 1H), 7.54-7.53 (m, 2H), 7.49-7.46 (m, 1H), 5.93-5.83 (m, 1H), 5.21-5.17 (m, 1H), 5.08-5.06 (m, 1H), 4.74-4.68 (m, 1H), 2.85-2.81 (m, 1H), 2.72-2.68 (m, 2H), 2.28 (dd,  $J = 12.81$  Hz, 5.86 Hz, 1H), 2.02 (dd,  $J = 12.76$  Hz, 10.21 Hz, 1H), 1.27 (s, 3H), 1.25 (s, 3H);  $^{13}\text{C}$  NMR (100 MHz,  $\text{CDCl}_3$ )  $\delta$  181.3, 169.5, 148.4, 138.3, 136.3, 134.0, 133.8, 127.9, 127.2, 122.0, 121.7, 118.2, 116.7, 53.7, 41.4, 40.3, 34.2, 24.9, 24.4; HRMS (ESI) calcd for  $\text{C}_{20}\text{H}_{23}\text{N}_2\text{O}_3^+$  ( $[\text{M} + \text{H}]^+$ ) : 339.1703, found: 339.1712.

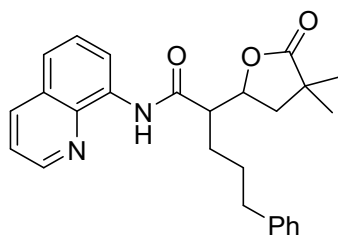

**3ga**

2-(4,4-dimethyl-5-oxotetrahydrofuran-2-yl)-5-phenyl-N-(quinolin-8-yl)pentanamide (**3ga**): light yellow oil (hexane/EtOAc = 5/1, yield: 74%);  $^1\text{H}$  NMR (400 MHz,  $\text{CDCl}_3$ )  $\delta$  9.96 (s, 1H), 8.81 (dd,  $J = 4.21$  Hz, 1.60 Hz, 1H), 8.75-8.71 (m, 1H), 8.17 (dd,  $J = 8.37$  Hz, 1.61 Hz, 1H), 7.55-7.51 (m, 2H), 7.48-7.45 (m, 1H), 7.23-7.19 (m, 2H), 7.14-7.11 (m, 3H), 4.69-4.63 (m, 1H), 2.75-2.70 (m, 1H), 2.67 (t,  $J = 7.71$  Hz, 2H), 2.24 (dd,  $J = 12.81$  Hz, 5.80 Hz, 1H), 2.05-1.94 (m, 3H), 1.88-1.79 (m, 1H), 1.77-1.70 (m, 1H), 1.25 (s, 3H), 1.24 (s, 3H);  $^{13}\text{C}$  NMR (100 MHz,  $\text{CDCl}_3$ )  $\delta$  181.4, 170.1, 148.4, 141.7, 138.3, 136.3, 133.8, 128.4, 128.3, 127.9, 127.2, 125.8, 122.1, 121.8, 116.7, 54.1, 41.5, 40.3, 35.9, 29.9, 29.1, 24.9, 24.3; HRMS (ESI) calcd for  $\text{C}_{26}\text{H}_{29}\text{N}_2\text{O}_3^+$  ( $[\text{M} + \text{H}]^+$ ) : 417.2173, found: 417.2176.

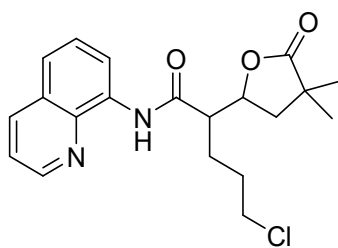

**3ha**



5-chloro-2-(4,4-dimethyl-5-oxotetrahydrofuran-2-yl)-N-(quinolin-8-yl)pentanamide (**3ha**): light yellow oil (hexane/EtOAc = 3/1, yield: 38%); <sup>1</sup>H NMR (400 MHz, CDCl<sub>3</sub>) δ 10.01 (s, 1H), 8.83 (dd, *J* = 4.24 Hz, 1.60 Hz, 1H), 8.75-8.70 (m, 1H), 8.18 (dd, *J* = 8.28 Hz, 1.56 Hz, 1H), 7.57-7.52 (m, 2H), 7.50-7.47 (m, 1H), 4.71-4.65 (m, 1H), 3.62-3.52 (m, 2H), 2.82-2.77 (m, 1H), 2.26 (dd, *J* = 12.82 Hz, 5.82 Hz, 1H), 2.12-1.88 (m, 5H), 1.27 (s, 3H), 1.25 (s, 3H); <sup>13</sup>C NMR (100 MHz, CDCl<sub>3</sub>) δ 181.2, 169.6, 148.5, 138.3, 136.4, 133.7, 127.9, 127.2, 122.2, 121.8, 116.8, 53.4, 44.5, 41.4, 40.3, 30.1, 27.6, 24.8, 24.3; HRMS (ESI) calcd for C<sub>20</sub>H<sub>24</sub>ClN<sub>2</sub>O<sub>3</sub><sup>+</sup> ([M + H]<sup>+</sup>) : 375.1470, found: 375.1471.

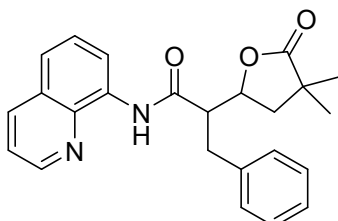

**3ia**

2-(4,4-dimethyl-5-oxotetrahydrofuran-2-yl)-3-phenyl-N-(quinolin-8-yl)propanamide (**3ia**): colorless oil (hexane/EtOAc = 3/1, yield: 71%); <sup>1</sup>H NMR (400 MHz, CDCl<sub>3</sub>) δ 9.62 (s, 1H), 8.69-8.65 (m, 2H), 8.11 (dd, *J* = 8.24 Hz, 1.56 Hz, 1H), 7.50-7.48 (m, 2H), 7.43-7.39 (m, 1H), 7.26-7.23 (m, 2H), 7.18 (t, *J* = 7.29 Hz, 2H), 7.10-7.07 (m, 1H), 4.77-4.71 (m, 1H), 3.30 (dd, *J* = 13.63 Hz, 4.46 Hz, 1H), 3.20 (dd, *J* = 13.57 Hz, 9.97 Hz, 1H), 3.03-2.98 (m, 1H), 2.30 (dd, *J* = 12.84 Hz, 5.88 Hz, 1H), 2.03 (dd, *J* = 12.75 Hz, 10.21 Hz, 1H), 1.28 (s, 3H), 1.26 (s, 3H); <sup>13</sup>C NMR (100 MHz, CDCl<sub>3</sub>) δ 181.4, 169.4, 148.2, 138.2, 138.2, 136.1, 133.7, 128.9, 128.6, 127.8, 127.1, 126.6, 122.0, 121.6, 116.6, 56.1, 41.4, 40.4, 36.2, 24.9, 24.4; HRMS (ESI) calcd for C<sub>24</sub>H<sub>25</sub>N<sub>2</sub>O<sub>3</sub><sup>+</sup> ([M + H]<sup>+</sup>) : 389.1860, found: 389.1863.

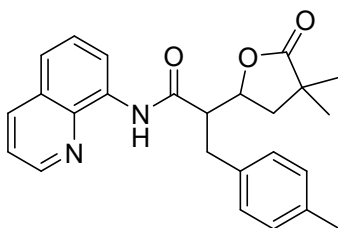

**3ja**

2-(4,4-dimethyl-5-oxotetrahydrofuran-2-yl)-N-(quinolin-8-yl)-3-(*p*-tolyl)propanamide (**3ja**): light yellow solid (hexane/EtOAc = 5/1, yield: 74%), mp 107-112 °C; <sup>1</sup>H NMR (400 MHz, CDCl<sub>3</sub>) δ 9.62 (s, 1H), 8.70-8.65 (m, 2H), 8.12 (dd, *J* = 8.23 Hz, 1.59 Hz, 1H), 7.52-7.48 (m, 2H), 7.43-7.39 (m, 1H), 7.12 (d, *J* = 7.96 Hz, 2H), 6.98 (d, *J* = 7.79 Hz, 2H), 4.76-4.69 (m, 1H), 3.25 (dd, *J* = 13.65 Hz, 4.55 Hz, 1H), 3.16 (dd, *J* = 13.57 Hz, 9.60 Hz, 1H), 3.01-2.96 (m, 1H), 2.30 (dd, *J* = 12.81 Hz, 5.85 Hz, 1H), 2.17 (s, 3H), 2.03 (dd, *J* = 12.82 Hz, 10.24 Hz, 1H), 1.27 (s, 3H), 1.26 (s, 3H); <sup>13</sup>C NMR (100 MHz, CDCl<sub>3</sub>) δ 181.4, 169.5, 148.1, 138.2, 136.2, 136.1, 135.0, 133.8, 129.3, 128.8, 127.8, 127.1, 121.9, 121.6, 116.6, 56.1, 41.4, 40.4, 35.8, 24.9, 24.4, 20.9; HRMS (ESI) calcd for C<sub>25</sub>H<sub>27</sub>N<sub>2</sub>O<sub>3</sub><sup>+</sup> ([M + H]<sup>+</sup>) : 403.2016, found: 403.2019.

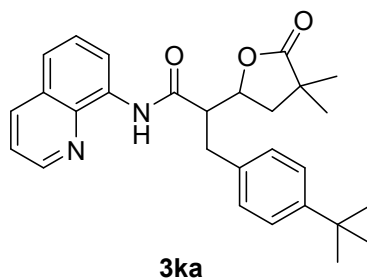

3-((4-*tert*-butyl)phenyl)methyl)-2-(4,4-dimethyl-5-oxotetrahydrofuran-2-yl)-N-(quinolin-8-yl)propanamide (**3ka**): white solid (hexane/EtOAc = 4/1, yield: 65%), mp 130-133 °C; <sup>1</sup>H NMR (400 MHz, CDCl<sub>3</sub>) δ 9.58 (s, 1H), 8.68-8.66 (m, 2H), 8.11 (dd, *J* = 8.24 Hz, 1.48 Hz, 1H), 7.53-7.48 (m, 2H), 7.42-7.38 (m, 1H), 7.19-7.14 (m, 4H), 4.78-4.72 (m, 1H), 3.27 (dd, *J* = 13.65 Hz, 4.53 Hz, 1H), 3.16 (dd, *J* = 13.60 Hz, 9.80 Hz, 1H), 3.01-2.95 (m, 1H), 2.31 (dd, *J* = 12.84 Hz, 5.88 Hz, 1H), 2.02 (dd, *J* = 12.74 Hz, 10.24 Hz, 1H), 1.28 (s, 3H), 1.26 (s, 3H), 1.12 (s, 9H); <sup>13</sup>C NMR (100 MHz, CDCl<sub>3</sub>) δ 181.4, 169.6, 149.3, 148.1, 138.2, 136.2, 135.1, 133.8, 128.5, 127.8, 127.2, 125.4, 121.9, 121.6, 116.5, 56.1, 41.4, 40.4, 35.8, 34.2, 31.1, 24.9, 24.4; HRMS (ESI) calcd for C<sub>28</sub>H<sub>33</sub>N<sub>2</sub>O<sub>3</sub><sup>+</sup> ([M + H]<sup>+</sup>) : 445.2486, found: 445.2489.

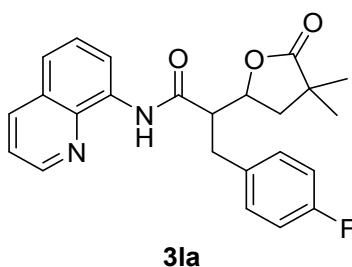

2-(4,4-dimethyl-5-oxotetrahydrofuran-2-yl)-3-(4-fluorophenyl)-N-(quinolin-8-yl) propanamide (**3la**): light yellow solid (hexane/EtOAc = 5/1, yield: 67%), mp 151-153 °C; <sup>1</sup>H NMR (400 MHz, CDCl<sub>3</sub>) δ 9.57 (s, 1H), 8.69-8.64 (m, 2H), 8.12 (dd, *J* = 8.28 Hz, 1.52 Hz, 1H), 7.51-7.48 (m, 2H), 7.44-7.40 (m, 1H), 7.21-7.18 (m, 2H), 6.87-6.83 (m, 2H), 4.76-4.70 (m, 1H), 3.30 (dd, *J* = 13.73 Hz, 4.01 Hz, 1H), 3.16 (dd, *J* = 13.55 Hz, 10.20 Hz, 1H), 2.96-2.90 (m, 1H), 2.32 (dd, *J* = 12.82 Hz, 5.81 Hz, 1H), 2.00 (dd, *J* = 12.72 Hz, 10.20 Hz, 1H), 1.28 (s, 3H), 1.27 (s, 3H); <sup>13</sup>C NMR (100 MHz, CDCl<sub>3</sub>) δ 181.3, 169.2, 161.7 (d, *J* = 244.7 Hz), 148.2, 138.1, 136.2, 133.8 (d, *J* = 3.2 Hz), 133.5, 130.4 (d, *J* = 8.0 Hz), 127.8, 127.1, 122.1, 121.7, 116.5, 115.4 (d, *J* = 21.2 Hz), 56.6, 41.6, 40.4, 35.6, 24.9, 24.4; <sup>19</sup>F NMR (376 MHz, CDCl<sub>3</sub>) δ -116.44 (s, 1F); HRMS (ESI) calcd for C<sub>24</sub>H<sub>24</sub>FN<sub>2</sub>O<sub>3</sub><sup>+</sup> ([M + H]<sup>+</sup>) : 407.1765, found: 407.1765.

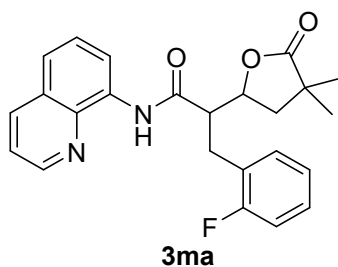

2-(4,4-dimethyl-5-oxotetrahydrofuran-2-yl)-3-(2-fluorophenyl)-N-(quinolin-8-yl)propanamide (**3ma**): light yellow solid (hexane/EtOAc = 4/1, yield: 72%), mp 132-138 °C; <sup>1</sup>H NMR (400 MHz,

CDCl<sub>3</sub>)  $\delta$  9.69 (s, 1H), 8.71 (dd,  $J$  = 4.20 Hz, 1.60 Hz, 1H), 8.67-8.62 (m, 1H), 8.11 (dd,  $J$  = 8.28 Hz, 1.63 Hz, 1H), 7.52-7.46 (m, 2H), 7.43-7.40 (m, 1H), 7.27-7.23 (m, 1H), 7.11-7.05 (m, 1H), 6.97-6.91 (m, 2H), 4.78-4.72 (m, 1H), 3.38 (dd,  $J$  = 12.93 Hz, 3.86 Hz, 1H), 3.20-3.08 (m, 2H), 2.31 (dd,  $J$  = 12.85 Hz, 5.89 Hz, 1H), 2.05 (dd,  $J$  = 12.80 Hz, 10.19 Hz, 1H), 1.28 (s, 3H), 1.25 (s, 3H); <sup>13</sup>C NMR (100 MHz, CDCl<sub>3</sub>)  $\delta$  181.2, 169.1, 161.1 (d,  $J$  = 245.40 Hz), 148.2, 138.2, 136.1, 133.7, 131.4 (d,  $J$  = 4.42 Hz), 128.5 (d,  $J$  = 8.13 Hz), 127.7, 127.1, 125.0 (d,  $J$  = 15.85 Hz), 124.1 (d,  $J$  = 3.56 Hz), 122.0, 121.6, 116.6, 115.4 (d,  $J$  = 21.91 Hz), 54.0, 41.1, 40.3, 29.6, 29.6, 24.9, 24.4; <sup>19</sup>F NMR (376 MHz, CDCl<sub>3</sub>)  $\delta$  -117.40 (s, 1F); HRMS (ESI) calcd for C<sub>24</sub>H<sub>24</sub>FN<sub>2</sub>O<sub>3</sub><sup>+</sup> ([M + H]<sup>+</sup>) : 407.1765, found: 407.1767.

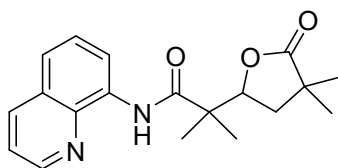

**3na**

2-(4,4-dimethyl-5-oxotetrahydrofuran-2-yl)-2-methyl-N-(quinolin-8-yl)propanamide (**3na**): white solid (hexane/EtOAc = 2/1, yield: 25%), mp 117-122 °C; <sup>1</sup>H NMR (400 MHz, CDCl<sub>3</sub>)  $\delta$  10.42 (s, 1H), 8.83 (dd,  $J$  = 4.24 Hz, 1.68 Hz, 1H), 8.74-8.69 (m, 1H), 8.15 (dd,  $J$  = 8.29 Hz, 1.65 Hz, 1H), 7.55-7.50 (m, 2H), 7.47-7.44 (m, 1H), 4.74 (dd,  $J$  = 10.77 Hz, 6.13 Hz, 1H), 2.15 (dd,  $J$  = 12.92 Hz, 6.13 Hz, 1H), 1.99 (dd,  $J$  = 12.89 Hz, 10.81 Hz, 1H), 1.47 (s, 6H), 1.30 (s, 3H), 1.22 (s, 3H); <sup>13</sup>C NMR (100 MHz, CDCl<sub>3</sub>)  $\delta$  181.3, 173.1, 148.5, 138.8, 136.2, 134.2, 127.9, 127.2, 121.8, 121.7, 116.6, 81.1, 46.3, 40.5, 38.7, 24.8, 24.6, 21.7, 21.1; HRMS (ESI) calcd for C<sub>19</sub>H<sub>23</sub>N<sub>2</sub>O<sub>3</sub><sup>+</sup> ([M + H]<sup>+</sup>) : 327.1703, found: 327.1704.

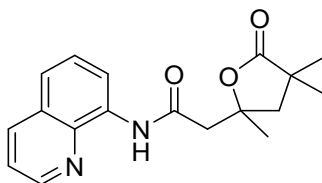

**3oa**

N-(quinolin-8-yl)-2-(2,4,4-trimethyl-5-oxotetrahydrofuran-2-yl)acetamide (**3oa**): light yellow solid (hexane/EtOAc = 4/1, yield: 52%), mp 106-108 °C; <sup>1</sup>H NMR (400 MHz, CDCl<sub>3</sub>)  $\delta$  10.01 (s, 1H), 8.83 (dd,  $J$  = 4.20 Hz, 1.60 Hz, 1H), 8.73-8.69 (m, 1H), 8.15 (dd,  $J$  = 8.24 Hz, 1.56 Hz, 1H), 7.54-7.49 (m, 2H), 7.47-7.44 (m, 1H), 2.98 (d,  $J$  = 14.70 Hz, 1H), 2.92 (d,  $J$  = 14.70 Hz, 1H), 2.61 (d,  $J$  = 13.60 Hz, 1H), 2.13 (d,  $J$  = 13.61 Hz, 1H), 1.64 (s, 3H), 1.37 (s, 3H), 1.31 (s, 3H); <sup>13</sup>C NMR (100 MHz, CDCl<sub>3</sub>)  $\delta$  181.6, 167.2, 148.4, 138.3, 136.3, 134.1, 127.9, 127.2, 121.9, 121.7, 116.6, 80.7, 49.8, 46.8, 40.7, 28.7, 27.8, 27.2; HRMS (ESI) calcd for C<sub>18</sub>H<sub>21</sub>N<sub>2</sub>O<sub>3</sub><sup>+</sup> ([M + H]<sup>+</sup>) : 313.1547, found: 313.1547.

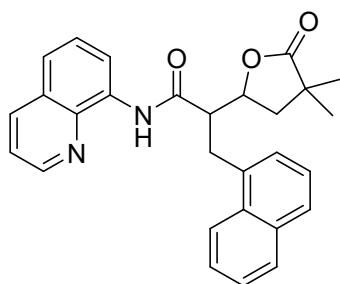

**3pa**

2-(4,4-dimethyl-5-oxotetrahydrofuran-2-yl)-3-(naphthalen-1-yl)-N-(quinolin-8-yl)propanamide (**3pa**): light yellow solid (hexane/EtOAc = 4/1, yield: 35%), mp 127-132 °C; <sup>1</sup>H NMR (400 MHz, CDCl<sub>3</sub>) δ 9.23 (s, 1H), 8.60 (dd, *J* = 6.72 Hz, 2.20 Hz, 1H), 8.42 (dd, *J* = 4.20 Hz, 1.52 Hz, 1H), 8.17-8.15 (m, 1H), 8.04 (dd, *J* = 8.24 Hz, 1.48 Hz, 1H), 7.77-7.75 (m, 1H), 7.56-7.51 (m, 2H), 7.49-7.42 (m, 3H), 7.34-7.31 (m, 2H), 7.15-7.11 (m, 1H), 4.91-4.85 (m, 1H), 3.95 (dd, *J* = 13.84 Hz, 3.68 Hz, 1H), 3.52 (dd, *J* = 13.84 Hz, 10.61 Hz, 1H), 3.15-3.10 (m, 1H), 2.37 (dd, *J* = 12.80 Hz, 5.76 Hz, 1H), 1.99 (dd, *J* = 12.76 Hz, 10.26 Hz, 1H), 1.32 (s, 3H), 1.28 (s, 3H); <sup>13</sup>C NMR (100 MHz, CDCl<sub>3</sub>) δ 181.4, 169.6, 147.9, 137.9, 136.0, 134.3, 134.0, 133.5, 131.5, 128.7, 127.6, 127.4, 127.4, 127.0, 126.3, 125.5, 125.3, 123.6, 121.9, 121.5, 116.5, 55.6, 41.7, 40.5, 33.7, 24.9, 24.4; HRMS (ESI) calcd for C<sub>28</sub>H<sub>27</sub>N<sub>2</sub>O<sub>3</sub><sup>+</sup> ([M + H]<sup>+</sup>) : 439.2016, found: 439.2015.

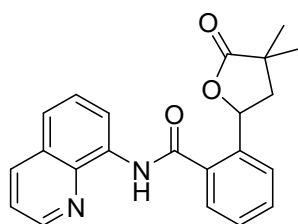

**3qa**

2-(4,4-dimethyl-5-oxotetrahydrofuran-2-yl)-N-(quinolin-8-yl)benzamide (**3qa**): light yellow solid (hexane/EtOAc = 5/1, yield: 69%), mp 117-120 °C; <sup>1</sup>H NMR (400 MHz, CDCl<sub>3</sub>) δ 10.39 (s, 1H), 8.86 (dd, *J* = 6.69 Hz, 2.12 Hz, 1H), 8.80 (dd, *J* = 4.20 Hz, 1.60 Hz, 1H), 8.19 (dd, *J* = 8.28 Hz, 1.60 Hz, 1H), 7.81-7.79 (m, 1H), 7.69-7.67 (m, 1H), 7.62-7.57 (m, 3H), 7.50-7.46 (m, 2H), 6.09 (dd, *J* = 9.44 Hz, 6.48 Hz, 1H), 2.88 (dd, *J* = 13.00 Hz, 6.45 Hz, 1H), 2.05 (dd, *J* = 12.99 Hz, 9.48 Hz, 1H), 1.36 (s, 3H), 1.30 (s, 3H); <sup>13</sup>C NMR (100 MHz, CDCl<sub>3</sub>) δ 182.2, 166.7, 148.4, 140.3, 138.6, 136.4, 134.4, 134.1, 131.4, 128.2, 128.0, 127.3, 127.1, 125.9, 122.2, 121.8, 116.5, 75.8, 46.9, 40.7, 25.1, 24.5; HRMS (ESI) calcd for C<sub>22</sub>H<sub>21</sub>N<sub>2</sub>O<sub>3</sub><sup>+</sup> ([M + H]<sup>+</sup>) : 361.1547, found: 361.1547.

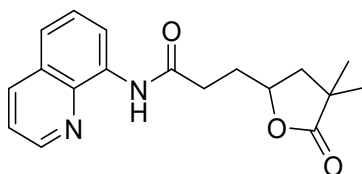

**3ua**

3-(4,4-dimethyl-5-oxotetrahydrofuran-2-yl)-N-(quinolin-8-yl) propanamide (**3ua**): brown solid (hexane/EtOAc = 2/1, yield: 55%), mp 84-90 °C; <sup>1</sup>H NMR (400 MHz, CDCl<sub>3</sub>) δ 9.87 (s, 1H), 8.81 (dd, *J* = 4.21 Hz, 1.48 Hz, 1H), 8.77-8.71 (m, 1H), 8.16 (dd, *J* = 8.29 Hz, 1.48 Hz, 1H), 7.56-7.50

(m, 2H), 7.48-7.45 (m, 1H), 4.62-4.55 (m, 1H), 2.86-2.73 (m, 2H), 2.35-2.22 (m, 2H), 2.07-1.98 (m, 1H), 1.81 (dd,  $J = 12.73$  Hz,  $9.97$  Hz, 1H), 1.29 (s, 3H), 1.26 (s, 3H);  $^{13}\text{C}$  NMR (100 MHz,  $\text{CDCl}_3$ )  $\delta$  181.8, 170.3, 148.2, 138.2, 136.3, 134.2, 127.9, 127.3, 121.7, 121.6, 116.4, 76.1, 43.4, 40.5, 33.7, 31.3, 25.0, 24.4; HRMS (ESI) calcd for  $\text{C}_{18}\text{H}_{21}\text{N}_2\text{O}_3^+$  ( $[\text{M} + \text{H}]^+$ ): 313.1547, found: 313.1549.

## 6. Removal of Directing Group & Derivative Reaction of 3aa

The procedure for the synthesis of compound 4<sup>15</sup>

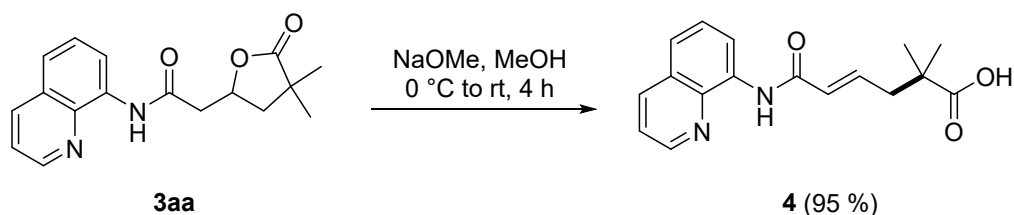

To a solution of **3aa** (0.2 mmol, 1.0 equiv.) in MeOH (2.05 mL) was added sodium methoxide (0.8 mmol, 4.0 equiv.) at 0 °C, and the mixture was allowed to warm to room temperature. After being stirred at same temperature for 4 h, the mixture was diluted with saturated  $\text{NH}_4\text{Cl}$  (1 mL) at 0 °C and extracted with EtOAc (20 mL  $\times$  3). The combined organic extracts were washed with brine (20 mL  $\times$  2), dried and concentrated in vacuo. The residue was purified by silica gel chromatography (hexane/EtOAc = 1:1) to afford **4** in 95% yield as light yellow solid. mp 121-132 °C;  $^1\text{H}$  NMR (400 MHz,  $\text{CDCl}_3$ )  $\delta$  10.25 (s, 1H), 9.84 (s, 1H), 8.83 (dd,  $J = 7.40$  Hz,  $1.36$  Hz, 1H), 8.79 (dd,  $J = 4.24$  Hz,  $1.64$  Hz, 1H), 8.14 (dd,  $J = 8.24$  Hz,  $1.56$  Hz, 1H), 7.55-7.47 (m, 2H), 7.45-7.42 (m, 1H), 7.09-7.01 (m, 1H), 6.24 (d,  $J = 15.12$  Hz, 1H), 2.55 (dd,  $J = 7.68$  Hz,  $0.76$  Hz, 2H), 1.29 (s, 6H);  $^{13}\text{C}$  NMR (100 MHz,  $\text{CDCl}_3$ )  $\delta$  182.7, 163.9, 148.1, 141.6, 138.4, 136.5, 134.4, 127.9, 127.5, 127.4, 121.7, 121.6, 117.1, 42.3, 42.2, 24.9; HRMS (ESI) calcd for  $\text{C}_{17}\text{H}_{19}\text{N}_2\text{O}_3^+$  ( $[\text{M} + \text{H}]^+$ ): 299.1390, found: 299.1390.

The procedure for the synthesis of compound 5 and 5'

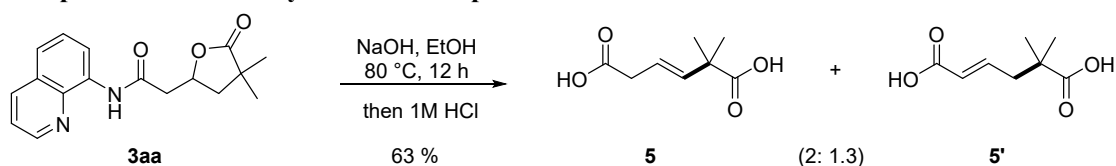

A mixture of **3aa** (0.2 mmol, 1.0 equiv.) and NaOH (2 mmol, 20 equiv.) was heated in ethanol (3.0 mL) for 12 h at 80 °C. After the mixture was cooled to room temperature and diluted with water (3.0 mL), the solution of 1M hydrochloric acid was added until the pH value was about 2-3. The mixture was then extracted with  $\text{CH}_2\text{Cl}_2$  (20 ml  $\times$  3). The combined organic extracts were washed with brine (20 mL  $\times$  2) and dried over anhydrous  $\text{Na}_2\text{SO}_4$ . After the organic material was concentrated in vacuum, the product was purified by column chromatography on silica gel (100-200 mesh) to afford a mixture of **5** and **5'** as a mixture ( $dr = 2.7:1$ ) in 63 % overall yield as yellow oil.  $^1\text{H}$  NMR (400 MHz,  $\text{CDCl}_3$ )  $\delta$  9.63 (s, 3.30H), 7.06-6.98 (m, 0.65H), 5.89-5.80 (m, 1.65 H), 5.70-5.63 (m, 1H), 3.12 (dd,  $J = 6.88$  Hz,  $1.12$  Hz, 2H), 2.47 (dd,  $J = 7.73$  Hz,  $0.92$  Hz, 1.30H), 1.33 (s, 6H), 1.24 (s, 3.90H);  $^{13}\text{C}$  NMR (100 MHz,  $\text{CDCl}_3$ )  $\delta$  182.8, 178.0, 138.1, 120.4, 44.1, 42.1, 24.6; HRMS (ESI) calcd for  $\text{C}_8\text{H}_{11}\text{O}_4^-$  ( $[\text{M} - \text{H}]^-$ ): 171.0663, found: 177.0651.

### The procedure for the synthesis of compound **6**<sup>3</sup>

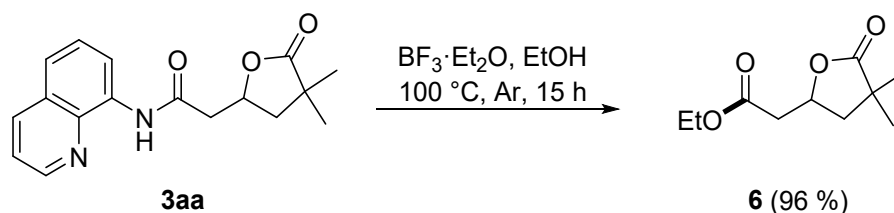

To a dry tube was added **3aa** (0.20 mmol, 1.0 equiv.), anhydrous EtOH (2.0 mL), followed by the addition of  $\text{BF}_3 \cdot \text{Et}_2\text{O}$  (1.2 mmol, 6.0 equiv.) at ambient temperature. The mixture was degassed three times with argon, and then allowed to stir at  $100^\circ\text{C}$ . After 15 h, the reaction was cooled to ambient temperature. The mixture was diluted with dichloromethane and then quenched by  $\text{Et}_3\text{N}$  (2.0 mmol, 10 equiv.). Rotary evaporation of the organic solvent and further purification by flash column chromatography (hexane/EtOAc = 8:1) afforded the desired products **6** in 96% as brown oil.  $^1\text{H}$  NMR (400 MHz,  $\text{CDCl}_3$ )  $\delta$  4.87-4.80 (m, 1H), 4.20-4.15 (m, 2H), 2.81 (dd,  $J = 16.17$  Hz, 6.91 Hz, 1H), 2.60 (dd,  $J = 16.16$  Hz, 6.17 Hz, 1H), 2.30 (dd,  $J = 12.76$  Hz, 6.05 Hz, 1H), 1.83 (dd,  $J = 12.71$  Hz, 10.01 Hz, 1H), 1.29-1.26 (m, 9H);  $^{13}\text{C}$  NMR (100 MHz,  $\text{CDCl}_3$ )  $\delta$  181.2, 169.6, 72.7, 61.0, 43.0, 40.3, 40.2, 24.9, 24.4, 14.1; HRMS (ESI) calcd for  $\text{C}_{10}\text{H}_{17}\text{O}_4^+$  ( $[\text{M} + \text{H}]^+$ ): 201.1121, found: 201.1119.

### The procedure for the synthesis of compound **7**<sup>16</sup>

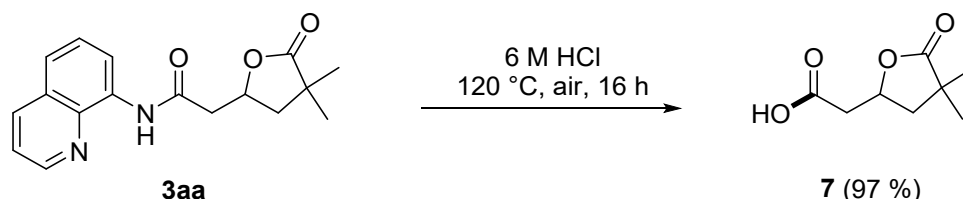

To a dry Schlenk tube equipped with a magnetic stir bar were added **3aa** (0.2 mmol, 1.0 equiv.) and 6 M HCl (1.5 mL). The tube was sealed and heated at  $120^\circ\text{C}$  for 16 h. The mixture was then diluted with water, then extracted with EtOAc (20 ml  $\times$  3). The organic layers were combined, dried, and concentrated under vacuum. The residue was further purification by flash column chromatography (hexane/EtOAc = 1:1) afforded the desired free acid **7** in 97% as brown oil.  $^1\text{H}$  NMR (400 MHz,  $\text{CDCl}_3$ )  $\delta$  7.47 (s, 1H), 4.87-4.80 (m, 1H), 2.86 (dd,  $J = 16.60$  Hz, 7.16 Hz, 1H), 2.69 (dd,  $J = 16.60$  Hz, 5.90 Hz, 1H), 2.32 (dd,  $J = 12.80$  Hz, 6.04 Hz, 1H), 1.85 (dd,  $J = 12.80$  Hz, 10.00 Hz, 1H), 1.29 (s, 3H), 1.29 (s, 3H);  $^{13}\text{C}$  NMR (100 MHz,  $\text{CDCl}_3$ )  $\delta$  181.4, 175.0, 72.4, 42.9, 40.3, 39.9, 24.8, 24.3; HRMS (ESI) calcd for  $\text{C}_8\text{H}_{12}\text{NaO}_4^+$  ( $[\text{M} + \text{Na}]^+$ ): 195.0628, found: 195.0627.

### The procedure for the synthesis of compound **8**<sup>17</sup>

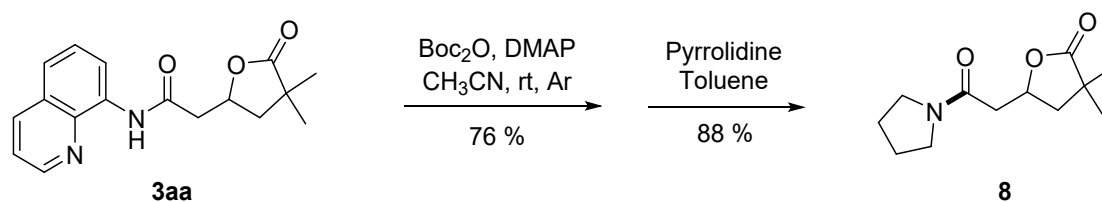

To a dry Schlenk tube containing a magnetic stir bar, were added **3aa** (0.2 mmol, 1.0 equiv.), DMAP (0.3 mmol, 1.5 equiv.), and Boc anhydride (0.8 mmol, 4.0 equiv.). The reaction tube was evacuated and backfilled with Ar ( $\times 3$ ), followed by addition of anhydrous MeCN (3 mL). The reaction mixture was stirred at rt for 2 h. After completion, the reaction was concentrated under vacuum and purified by column chromatography (hexane/EtOAc = 1:2) to afford the Boc-protected amide. The Boc amide was then dissolved in toluene (0.5 M), followed by addition of pyrrolidine (1.5 equiv.). The reaction mixture was heated under N<sub>2</sub> atmosphere at 60 °C overnight. Upon completion, the organic mixture was concentrated under vacuum and purified by column chromatography (PE/EA = 1:1) to afford product **8** as light yellow oil. <sup>1</sup>H NMR (400 MHz, CDCl<sub>3</sub>)  $\delta$  4.98-4.91 (m, 1H), 3.52-3.38 (m, 4H), 2.86 (dd,  $J = 15.60$  Hz, 6.24 Hz, 1H), 2.50 (dd,  $J = 15.64$  Hz, 6.64 Hz, 1H), 2.41 (dd,  $J = 12.86$  Hz, 5.90 Hz, 1H), 2.02-1.92 (m, 2H), 1.90-1.79 (m, 3H), 1.28 (s, 6H); <sup>13</sup>C NMR (100 MHz, CDCl<sub>3</sub>)  $\delta$  181.6, 167.4, 73.9, 46.8, 45.7, 43.7, 40.5, 40.3, 26.0, 24.9, 24.3, 24.3; HRMS (ESI) calcd for C<sub>12</sub>H<sub>20</sub>NO<sub>3</sub><sup>+</sup> ([M + H]<sup>+</sup>) : 226.1438, found: 226.1438.

## 7. The Single Crystal X-ray Diffraction Study

### The Single Crystal X-ray Diffraction Study of **3aa**

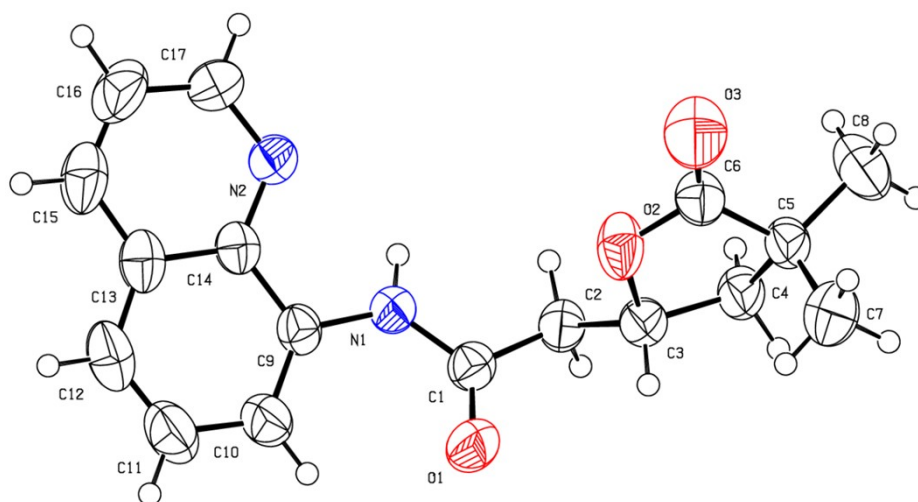

CCDC: 2088153 (**3aa**) contains the supplementary crystallographic data for this paper. These data can be obtained free of charge from The Cambridge Crystallographic Data Centre via [www.ccdc.cam.ac.uk/data\\_request/cif](http://www.ccdc.cam.ac.uk/data_request/cif).

#### Table S7 Crystal data and structure refinement for CCDC: 2088153 (**3aa**) (displacement ellipsoids are drawn at the 30% probability level).

|                     |                                                               |
|---------------------|---------------------------------------------------------------|
| Identification code | 202009192_tw                                                  |
| Empirical formula   | C <sub>17</sub> H <sub>18</sub> N <sub>2</sub> O <sub>3</sub> |
| Formula weight      | 298.33                                                        |
| Temperature/K       | 293(2)                                                        |
| Crystal system      | monoclinic                                                    |
| Space group         | P2 <sub>1</sub> /c                                            |
| a/Å                 | 12.8383(5)                                                    |

|                                             |                                                          |
|---------------------------------------------|----------------------------------------------------------|
| b/Å                                         | 13.0290(5)                                               |
| c/Å                                         | 9.3932(4)                                                |
| $\alpha$ /°                                 | 90                                                       |
| $\beta$ /°                                  | 104.569(4)                                               |
| $\gamma$ /°                                 | 90                                                       |
| Volume/Å <sup>3</sup>                       | 1520.69(11)                                              |
| Z                                           | 4                                                        |
| $\rho_{\text{calc}}/\text{cm}^3$            | 1.303                                                    |
| $\mu/\text{mm}^{-1}$                        | 0.736                                                    |
| F(000)                                      | 632.0                                                    |
| Crystal size/mm <sup>3</sup>                | 0.2 × 0.14 × 0.07                                        |
| Radiation                                   | CuK $\alpha$ ( $\lambda$ = 1.54184)                      |
| 2 $\theta$ range for data collection/°      | 7.114 to 134.158                                         |
| Index ranges                                | -15 ≤ h ≤ 14, -15 ≤ k ≤ 15, -3 ≤ l ≤ 11                  |
| Reflections collected                       | 2716                                                     |
| Independent reflections                     | 2716 [R <sub>int</sub> = ?, R <sub>sigma</sub> = 0.0229] |
| Data/restraints/parameters                  | 2716/1/206                                               |
| Goodness-of-fit on F <sup>2</sup>           | 1.099                                                    |
| Final R indexes [ $I \geq 2\sigma(I)$ ]     | R <sub>1</sub> = 0.0738, wR <sub>2</sub> = 0.2262        |
| Final R indexes [all data]                  | R <sub>1</sub> = 0.0813, wR <sub>2</sub> = 0.2327        |
| Largest diff. peak/hole / e Å <sup>-3</sup> | 0.45/-0.23                                               |

## 8. References

- Gurak, J. A.; Jr.; Yang, K. S.; Liu, Z.; Engle, K. M. Directed, Regiocontrolled Hydroamination of Unactivated Alkenes via Protodepalladation. *J. Am. Chem. Soc.* **2016**, *138*, 5805-5808.
- Combettes, L. E.; Schuler, M.; Patel, R.; Bonillo, B.; Odell, B.; Thompson, A. L.; Claridge, T. D. W.; Gouverneur, V. Synthesis of 3-Fluoropyrrolidines and 4-Fluoropyrrolidin-2-ones from Allylic Fluorides. *Chem.-Eur. J.* **2012**, *18*, 13126-13132.
- Tang, C.; Zhang, R.; Zhu, B.; Fu, J.; Deng, Y.; Tian, L.; Guan, W.; Bi, X. Directed Copper-Catalyzed Intermolecular Heck-Type Reaction of Unactivated Olefins and Alkyl Halides. *J. Am. Chem. Soc.* **2018**, *140*, 16929-16935.
- Morrill, L. C.; Smith, S. M.; Slawin, A. M. Z.; Smith, A. D. Isothiourea-Mediated Asymmetric Functionalization of 3-Alkenoic Acids. *J. Org. Chem.* **2014**, *79*, 1640-1655.
- (a) Ram, S.; Sharma, A. K.; Chauhan, A. S.; Das, P. Palladium-Catalyzed ortho-Halogen-induced Deoxygenative Approach of Alkyl Aryl Ketones to 2-Vinylbenzoic Acids. *Chem. Commun.* **2020**, *56*, 10674-10677. (b) Talbot, E. P. A.; Fernandes, T. de A.; McKenna J. M.; Toste, F. D. Asymmetric Palladium-Catalyzed Directed Intermolecular Fluoroarylation of Styrenes. *J. Am. Chem. Soc.* **2014**, *136*, 4101-4104.
- Johnson, P. R.; White, J. D. Condensation of Crotonic and Tiglic Acid Dianions With Aldehydes and Ketones. *J. Org. Chem.* **1984**, *49*, 4424-4429.
- Wang, J.; Chen, J.; Kee C. W.; Tan, C.-H. Enantiodivergent and  $\gamma$ -Selective Asymmetric



- Allylic Amination. *Angew. Chem., Int. Ed.* **2012**, *124*, 2432-2436.
8. Ye, Z.; Cai, X.; Li, J.; Dai, M. Catalytic Cyclopropanol Ring Opening for Divergent Syntheses of  $\gamma$ -Butyrolactones and  $\delta$ -Ketoesters Containing All-Carbon Quaternary Centers. *ACS Catal.* **2018**, *8*, 5907-5914.
  9. Abel B. A.; McCormick, C. L. Mechanistic Insights into Temperature-Dependent Trithiocarbonate Chain-End Degradation during the RAFT Polymerization of N-Arylmethacrylamides. *Macromolecules.* **2016**, *49*, 465-474.
  10. Frisch, M. J. T., G. W.; Schlegel, H. B.; Scuseria, G. E.; Robb, M. A.; Cheeseman, J. R.; Scalmani, G.; Barone, V.; Mennucci, B.; Petersson, G. A.; et al., Gaussian 09, Revision D.01; Gaussian Inc.: Wallingford, CT, . 2009.
  11. Becke, A. D., A New Mixing of Hartree-Fock and Local-Density-Functional Theories. *J. Chem. Phys.* **1993**, *98*, 1372-1377.
  12. Hay, P. J.; Wadt, W. R., Ab Initio Effective Core Potentials for Molecular Calculations. Potentials for Potassium to Gold Including the Outermost Core Orbitals. *J. Chem. Phys.* **1985**, *82*, 299-310.
  13. Marenich, A. V.; Cramer, C. J.; Truhlar, D. G., Universal Solvation Model Based on Solute Electron Density and on a Continuum Model of the Solvent Defined by the Bulk Dielectric Constant and Atomic Surface Tensions. *J. Phys. Chem. B* **2009**, *113*, 6378-6396.
  14. Fukui, K., The Path of Chemical Reactions-the IRC Approach. *Acc. Chem. Res.* **1981**, *14*, 363-368.
  15. Komine, K.; Urayama, Y.; Hosaka, T.; Fukuda, H.; Hatakeyama, S.; Ishihara, J. New Entry to the Enantioselective Formation of Substituted Cyclohexenes Bearing an All-Carbon Quaternary Stereogenic Center. *Chirality.* **2020**, *32*, 273-281.
  16. Matsuura, R.; Jankins, T. C.; Hill, D. E.; Yang, K. S.; Gallego, G. M.; Yang, S.; He, M.; Wang, F.; Marsters, R. P.; McAlpine I.; Engle, K. M. Palladium(II)-Catalyzed  $\gamma$ -Selective Hydroarylation of Alkenyl Carbonyl Compounds with Arylboronic Acids. *Chem. Sci.* **2018**, *9*, 8363-8368.
  17. (a) Verho, O.; Lati, M. P.; Oschmann, M. A Two-Step Procedure for the Overall Transamidation of 8-Aminoquinoline Amides Proceeding via the Intermediate N-Acyl-Boc-Carbamates. *J. Org. Chem.* **2018**, *83*, 4464-4476. (b) Hon, Y.-S.; Lin, S.-W.; Lu L.; Chen, Y.-J. The Mechanistic Study and Synthetic Applications of the Base Treatment in the Ozonolytic Reactions. *Tetrahedron.* **1995**, *51*, 5019-5034.

## 9. NMR and HRMS Spectra

### $^1\text{H}$ NMR Spectra of **3aa**

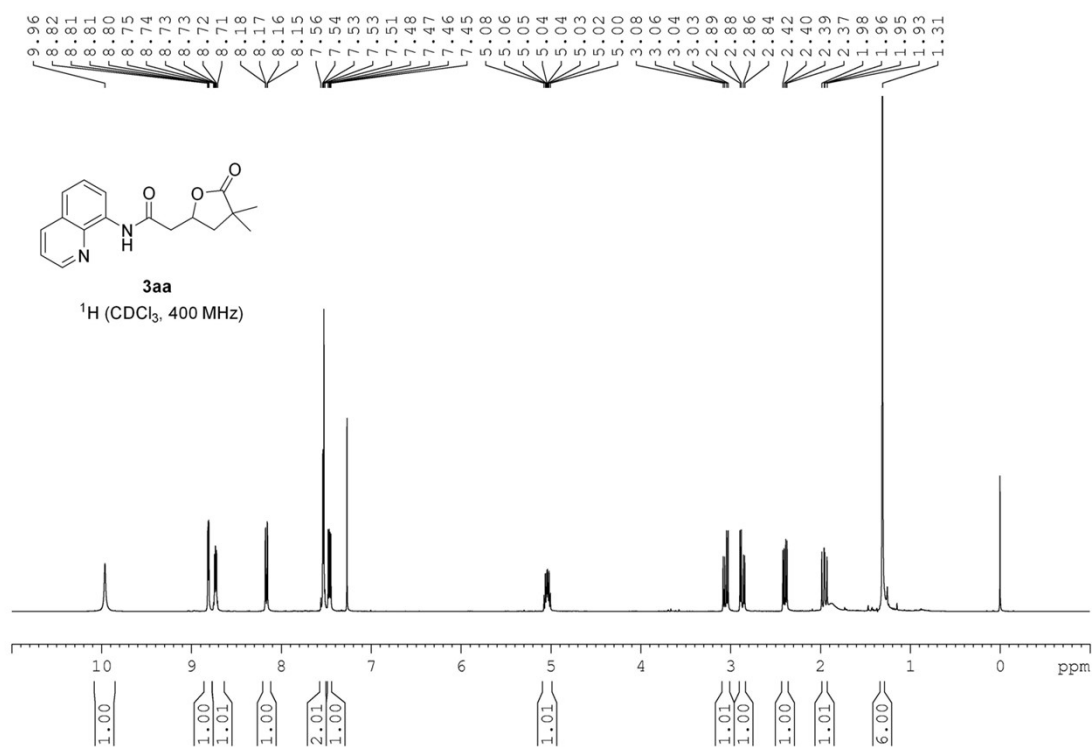

### $^{13}\text{C}$ NMR Spectra of **3aa**

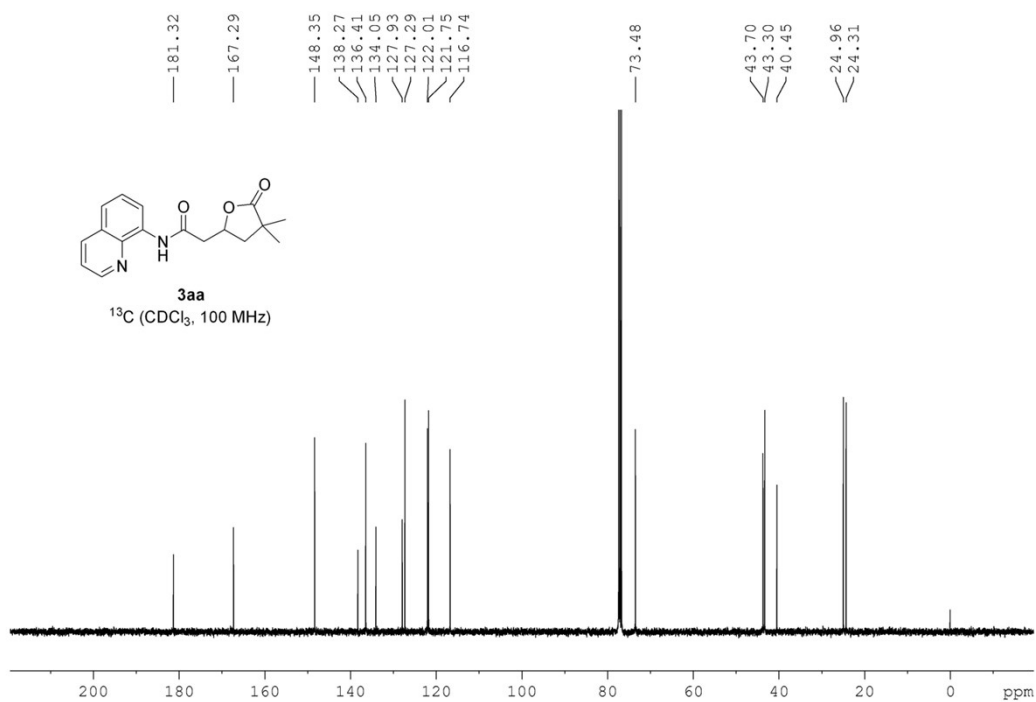

### HRMS Spectra of **3aa**

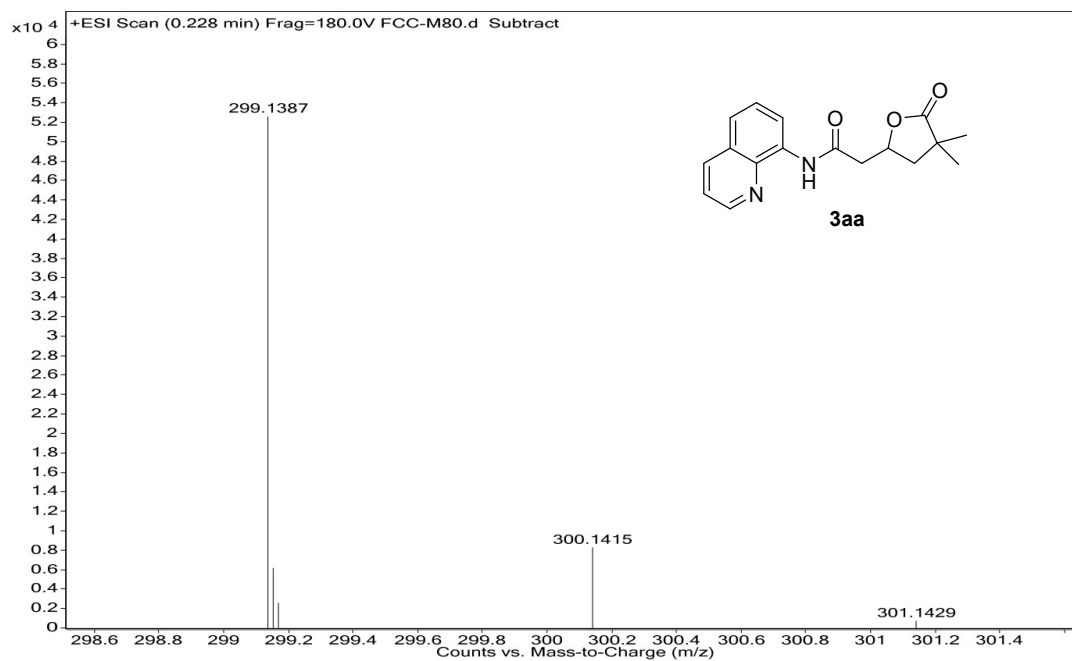

<sup>1</sup>H NMR Spectra of **3ab**

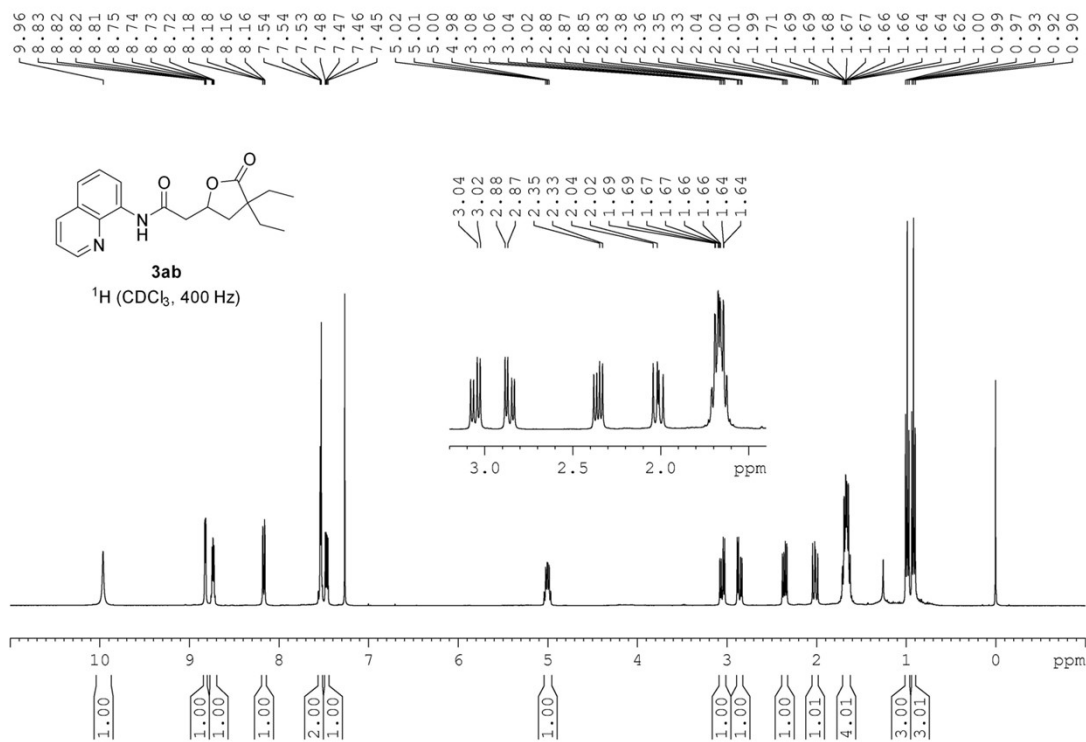

<sup>13</sup>C NMR Spectra of **3ab**

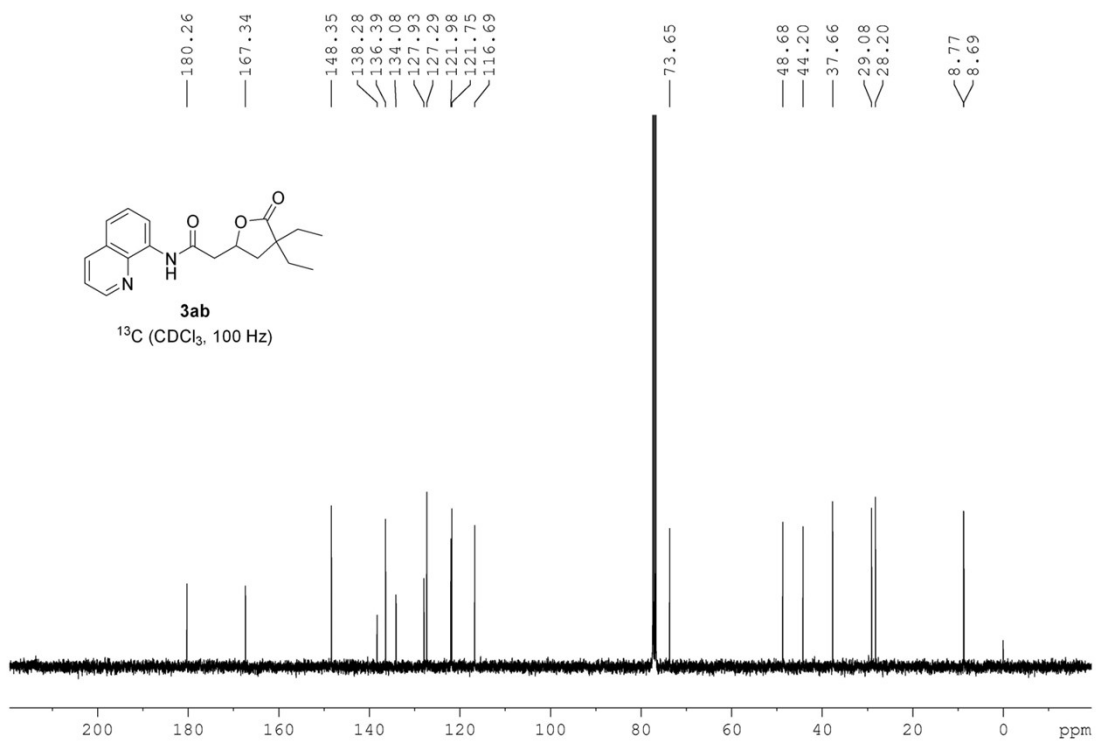

### HRMS Spectra of 3ab

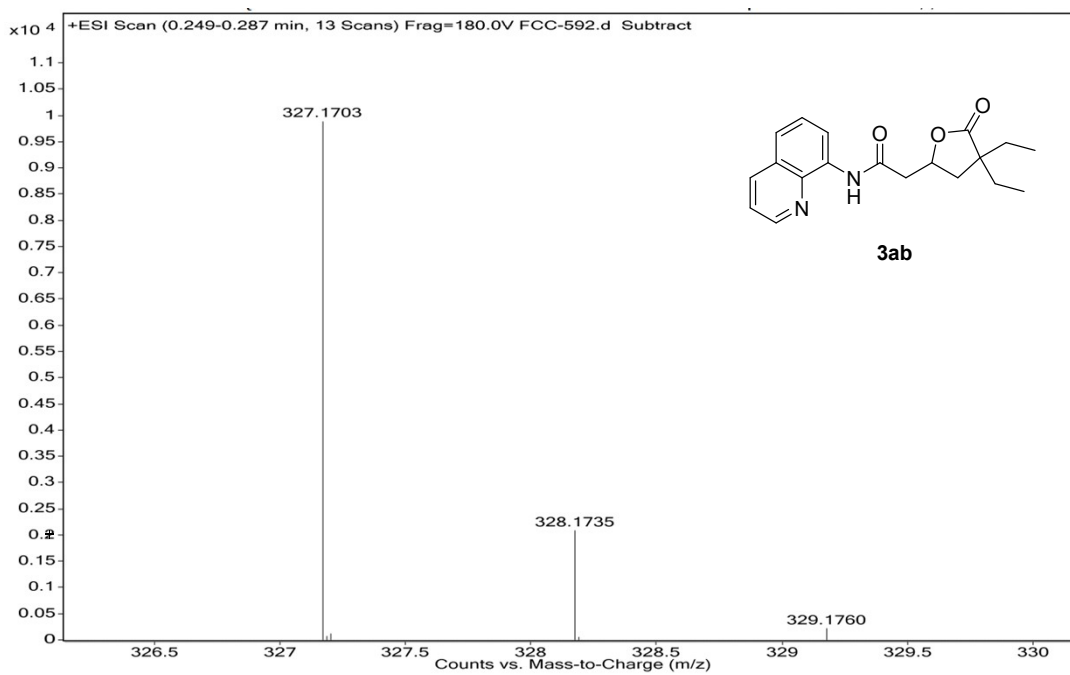

### <sup>1</sup>H NMR Spectra of 3ac

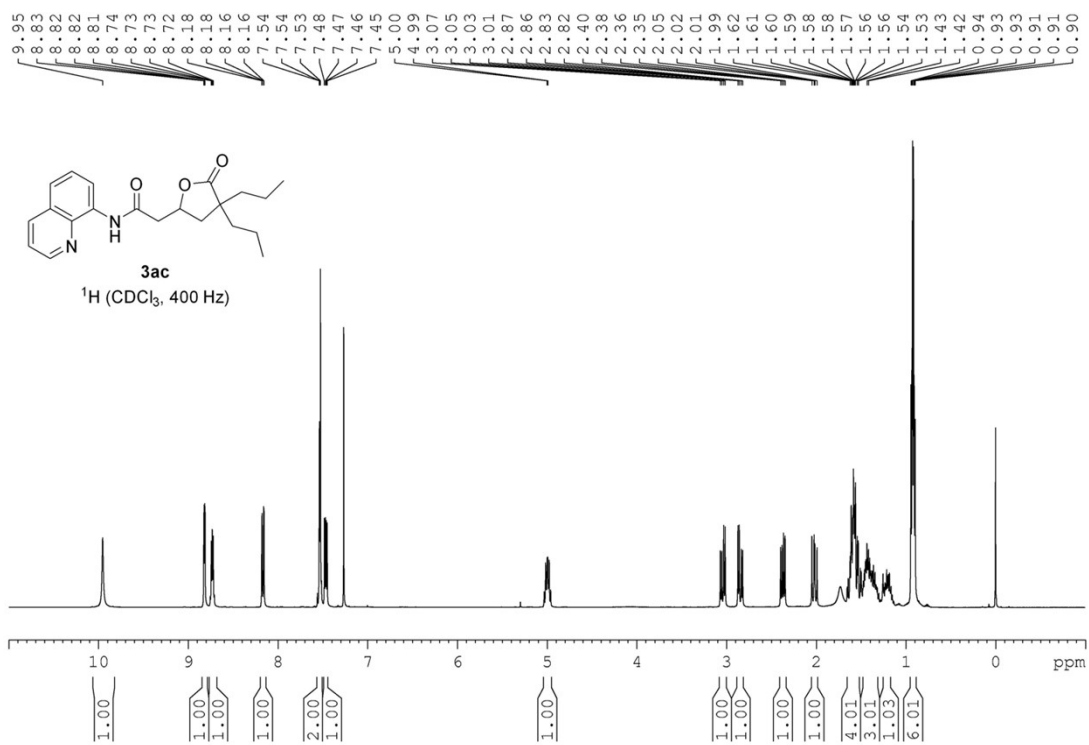

### <sup>13</sup>C NMR Spectra of **3ac**

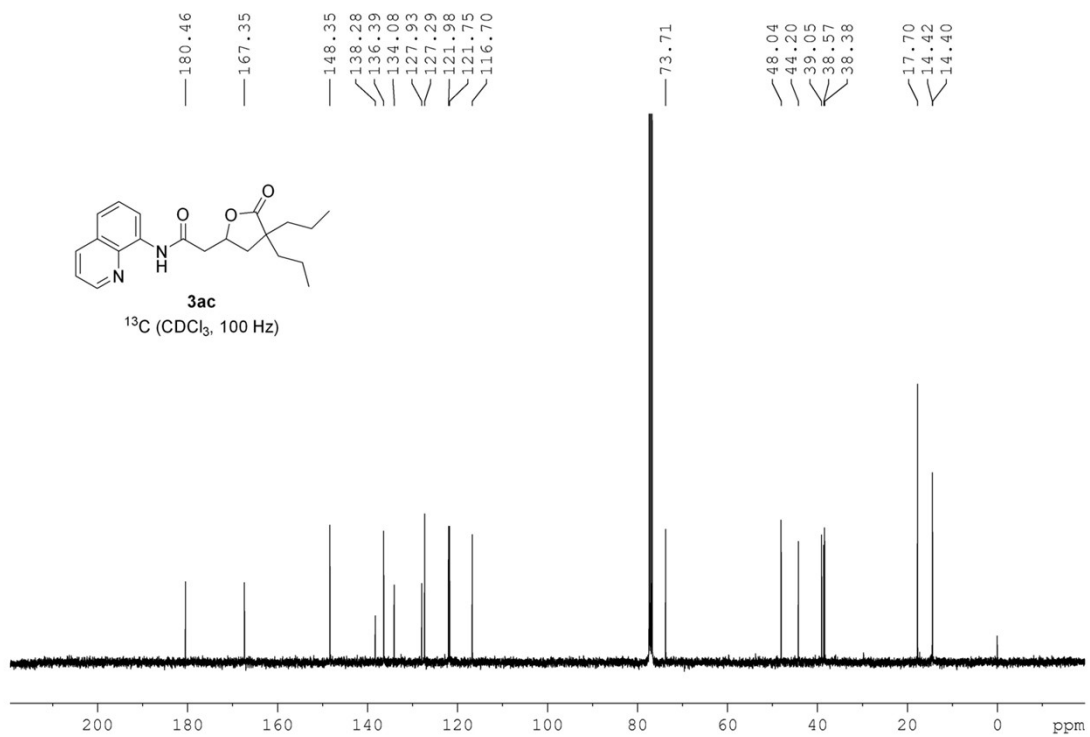

### HRMS Spectra of **3ac**

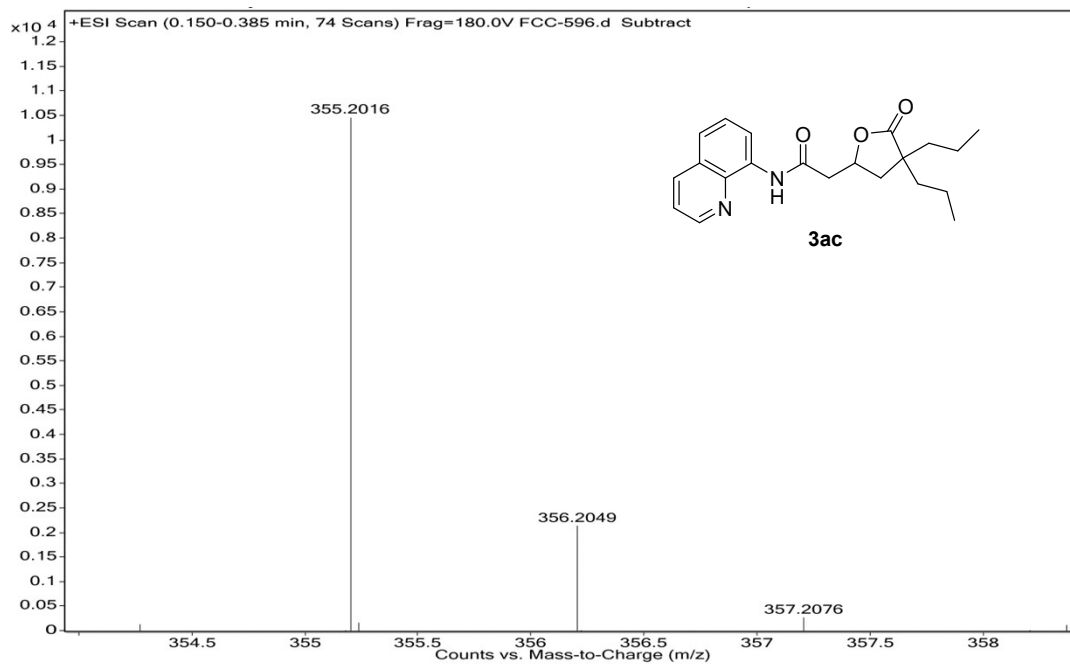

### <sup>1</sup>H NMR Spectra of 3ad

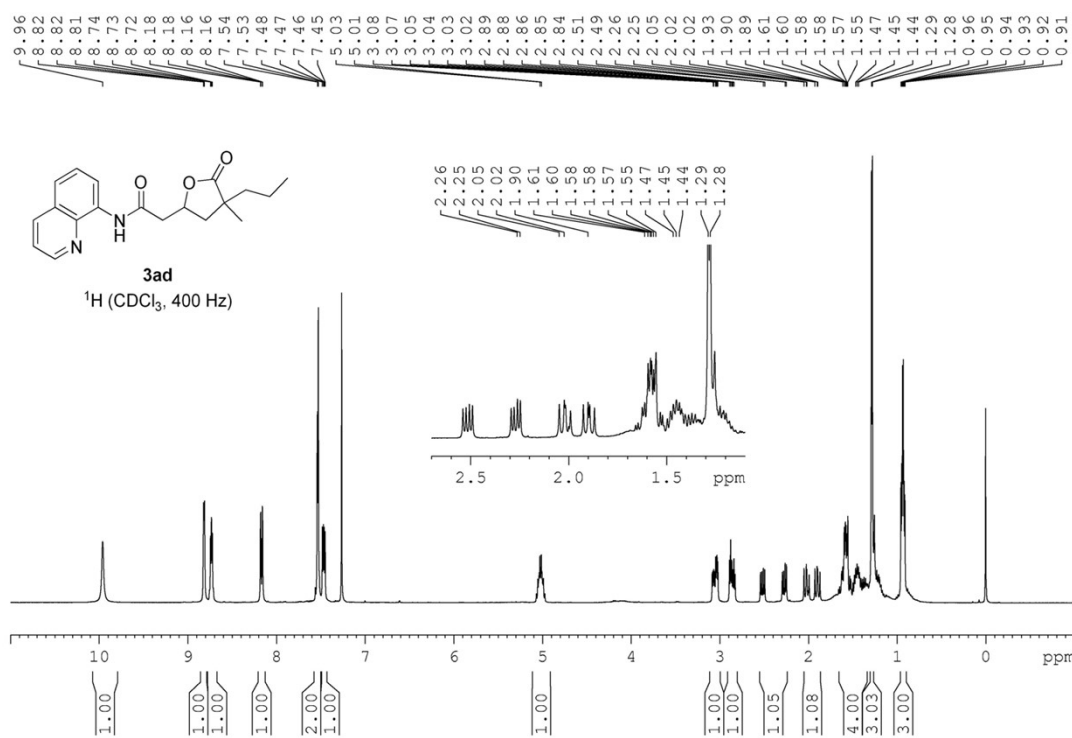

### <sup>13</sup>C NMR Spectra of 3ad

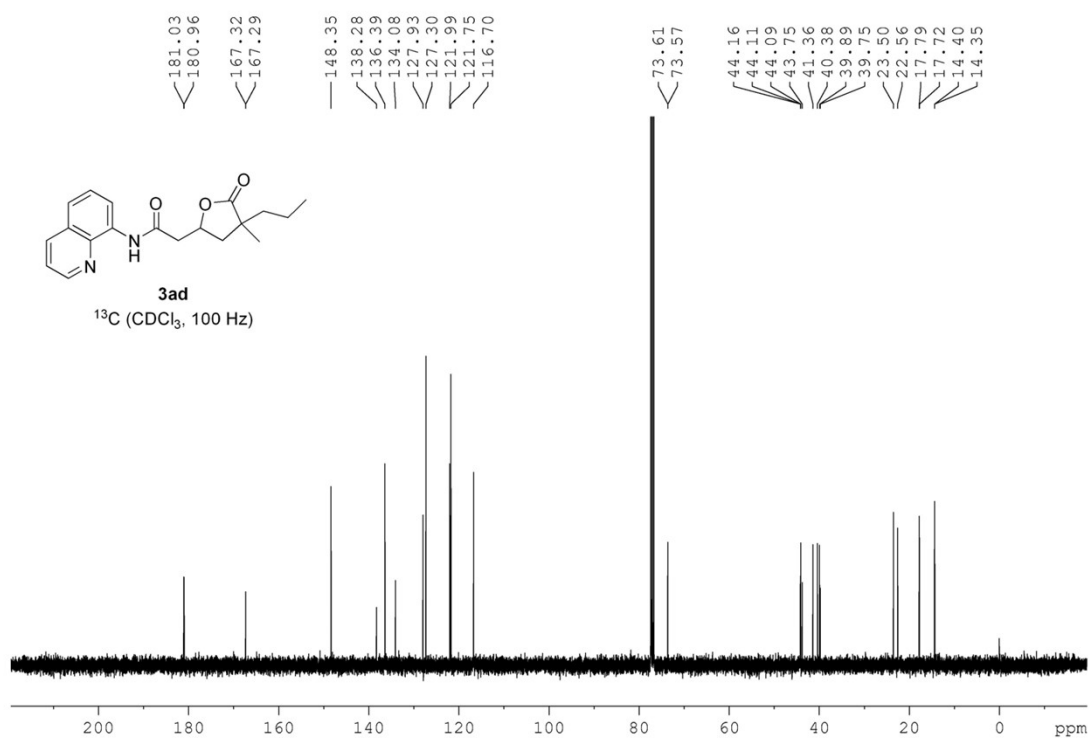

### HRMS Spectra of **3ad**

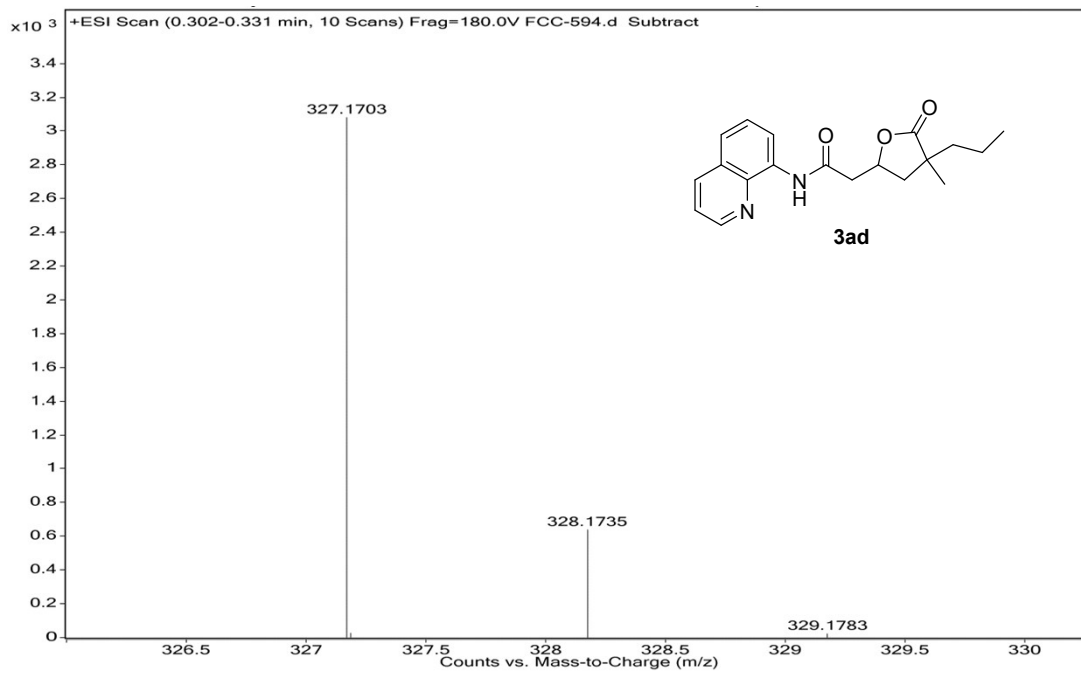

### <sup>1</sup>H NMR Spectra of **3ae**

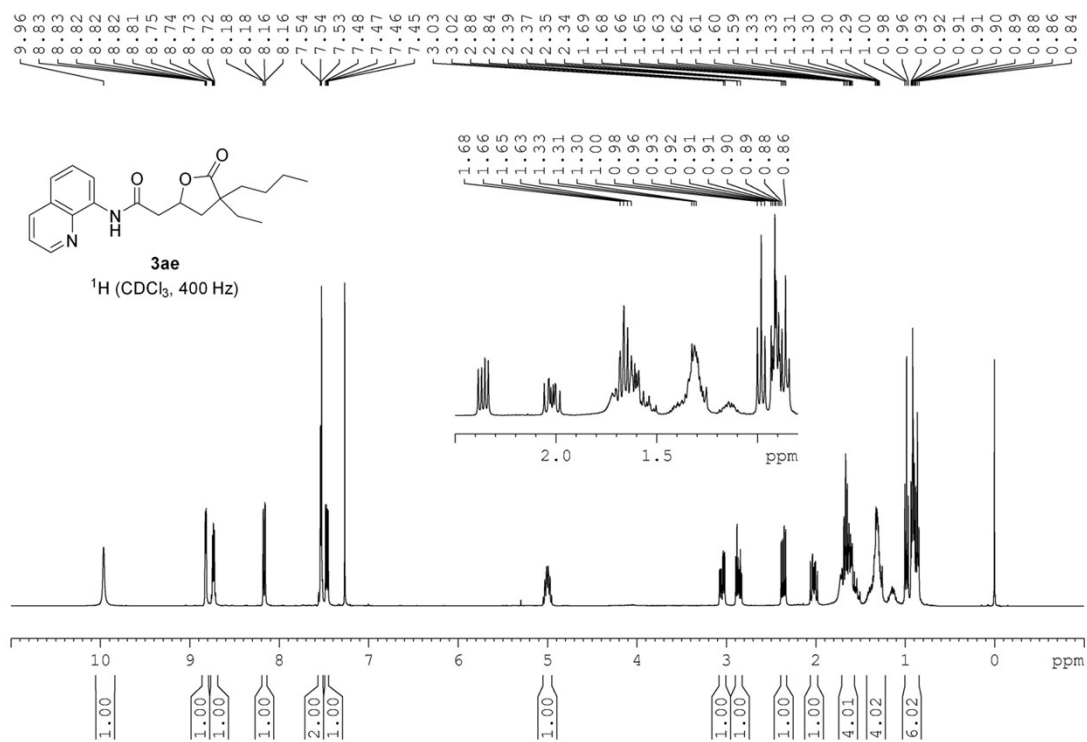

**<sup>13</sup>C NMR Spectra of 3ae**

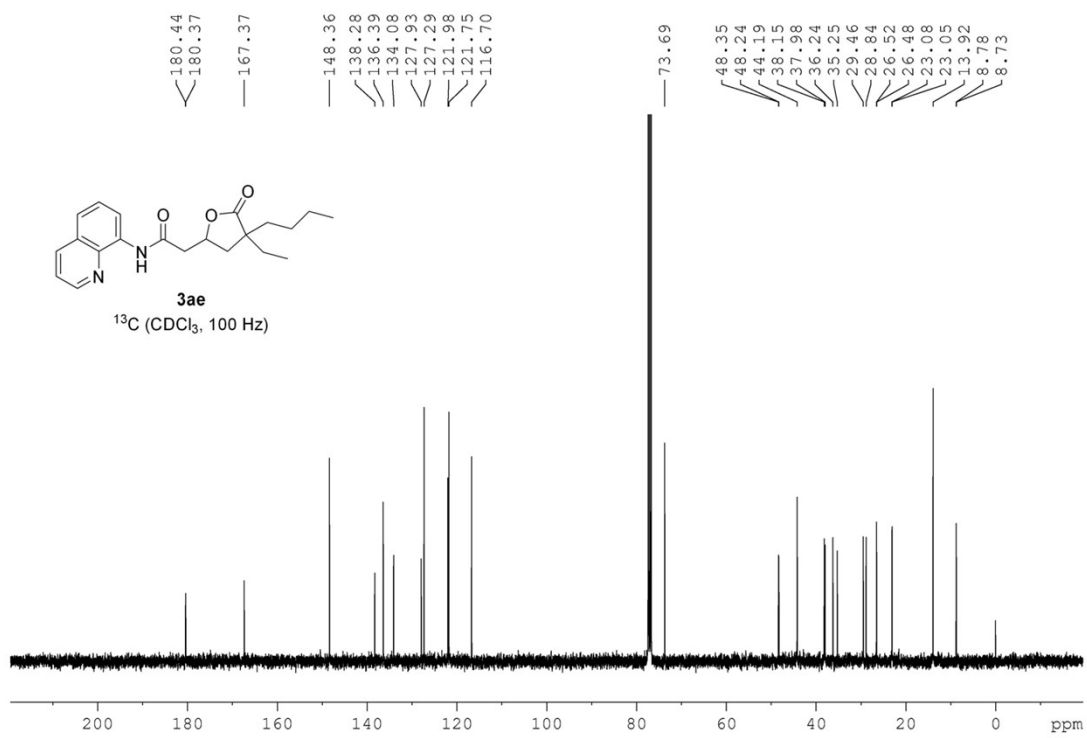

**HRMS Spectra of 3ae**



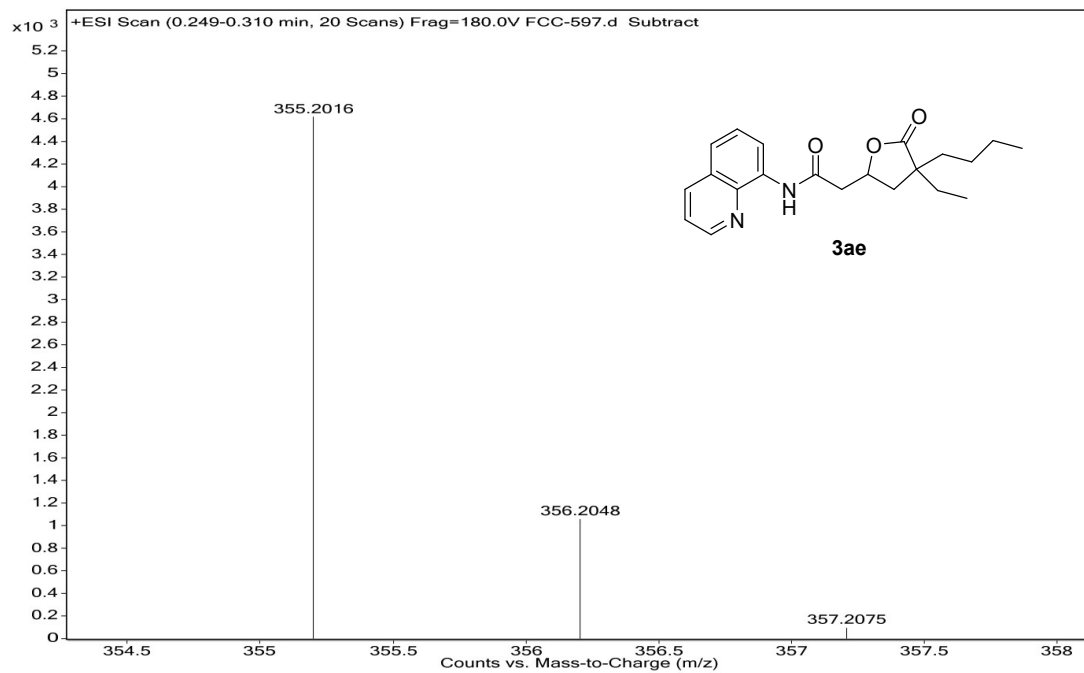

<sup>1</sup>H NMR Spectra of **3af**

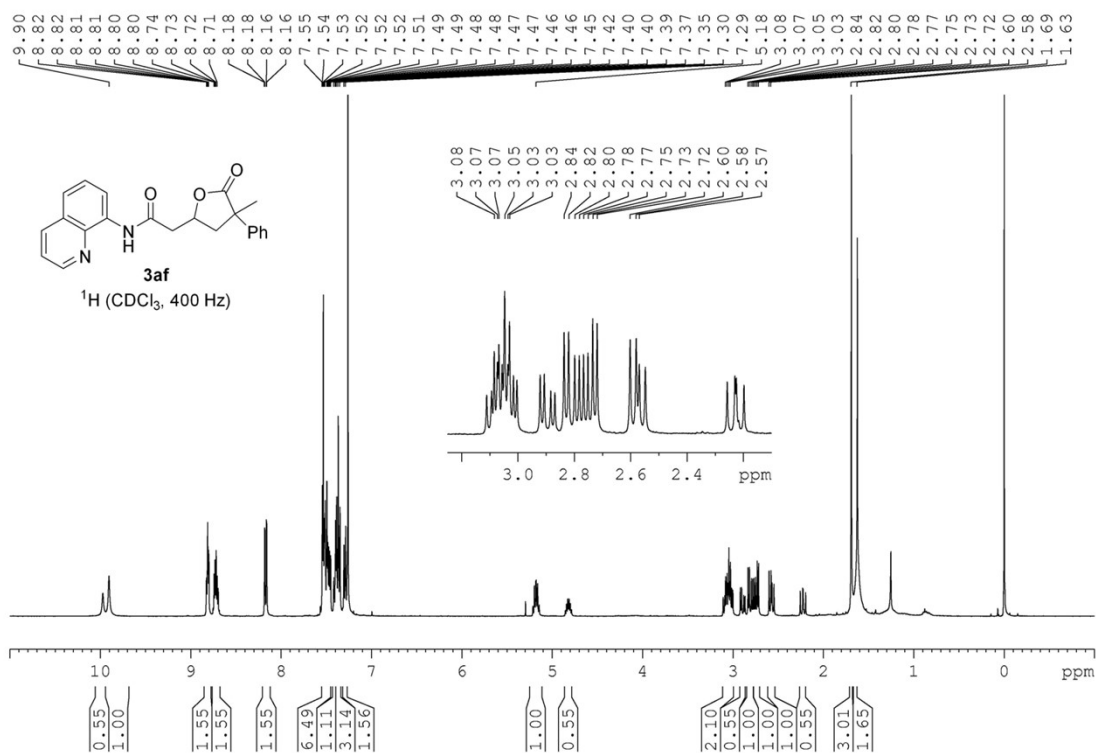

<sup>13</sup>C NMR Spectra of **3af**

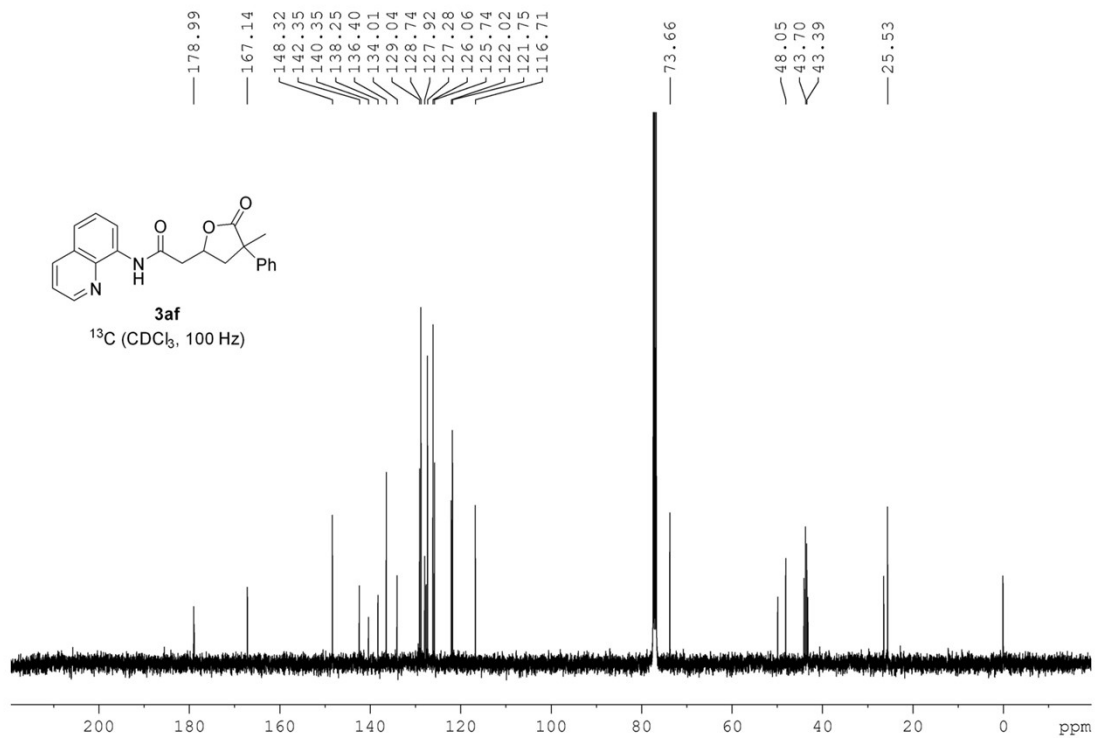

### HRMS Spectra of **3af**

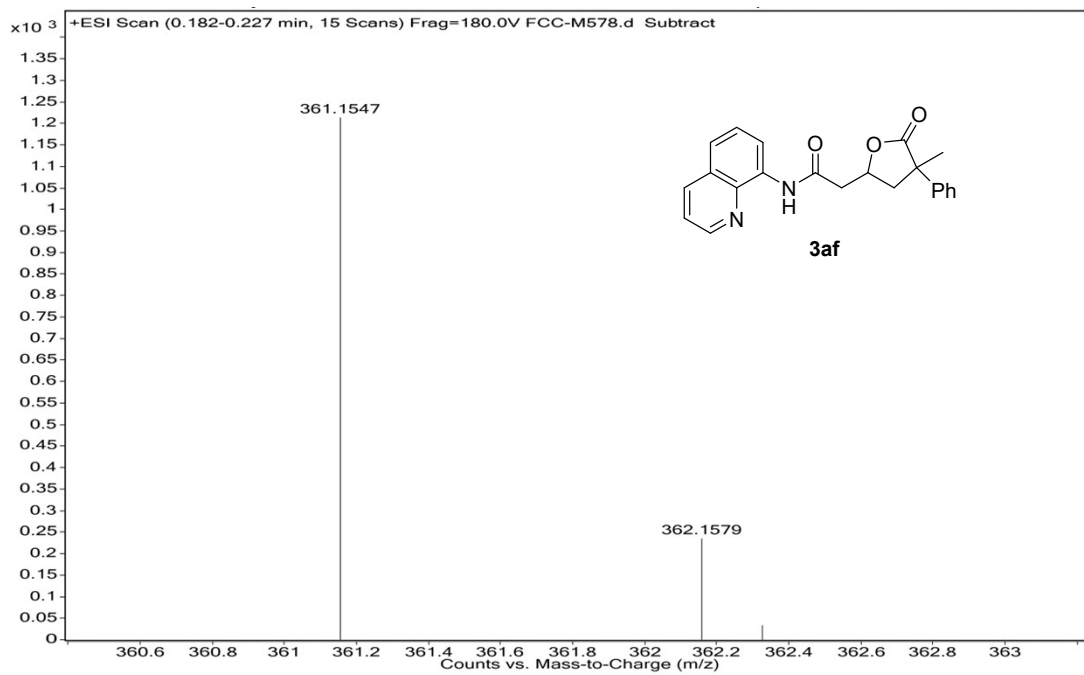

### <sup>1</sup>H NMR Spectra of **3ag**

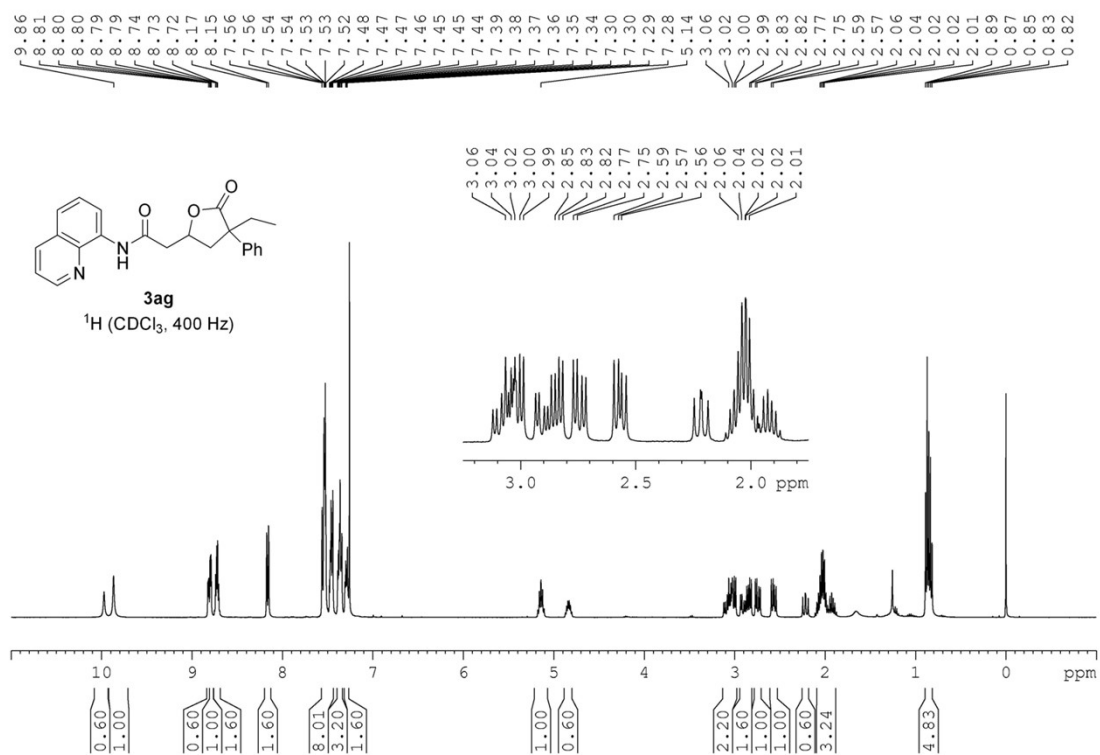

**<sup>13</sup>C NMR Spectra of 3ag**

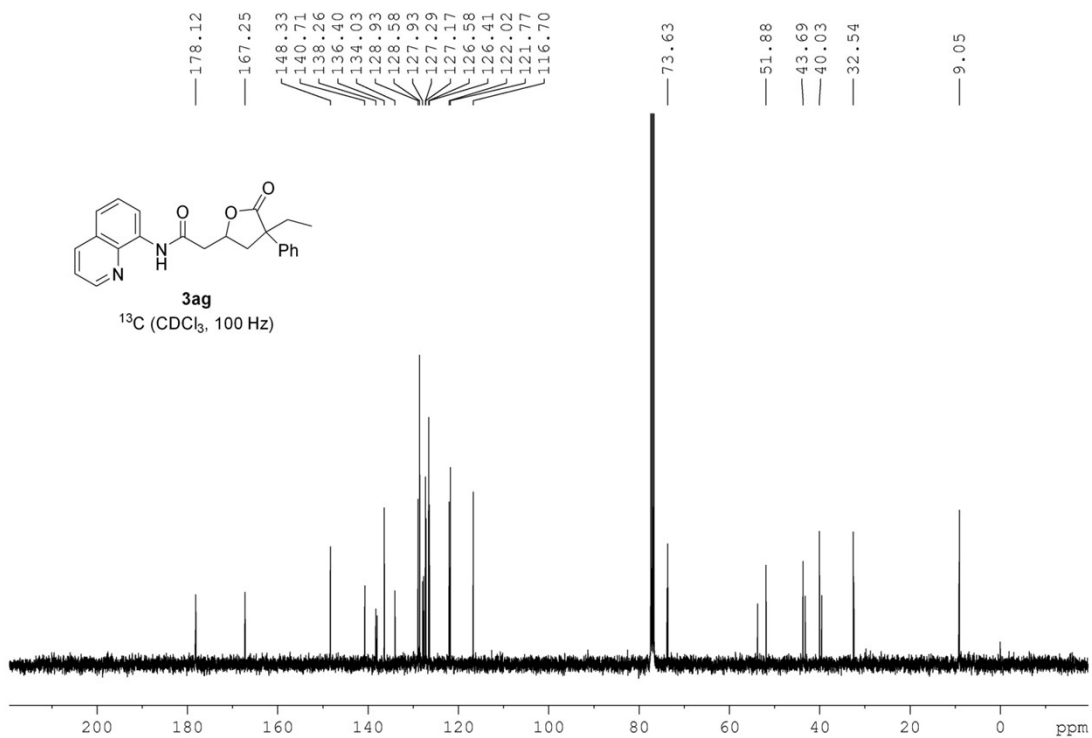

**HRMS Spectra of 3ag**



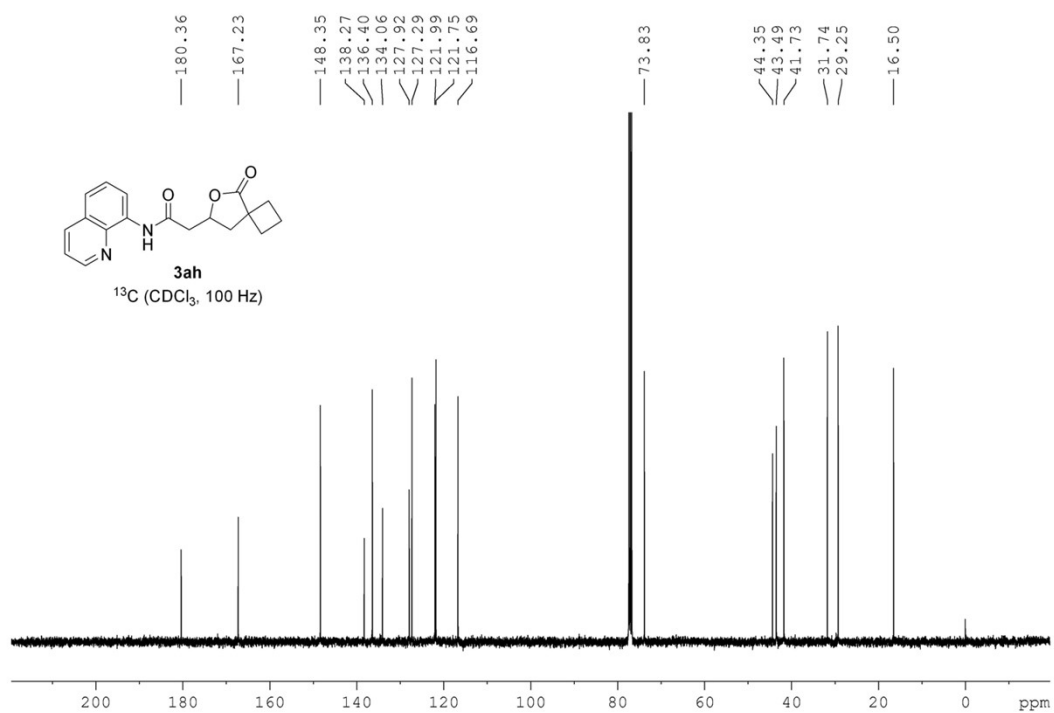

### HRMS Spectra of **3ah**

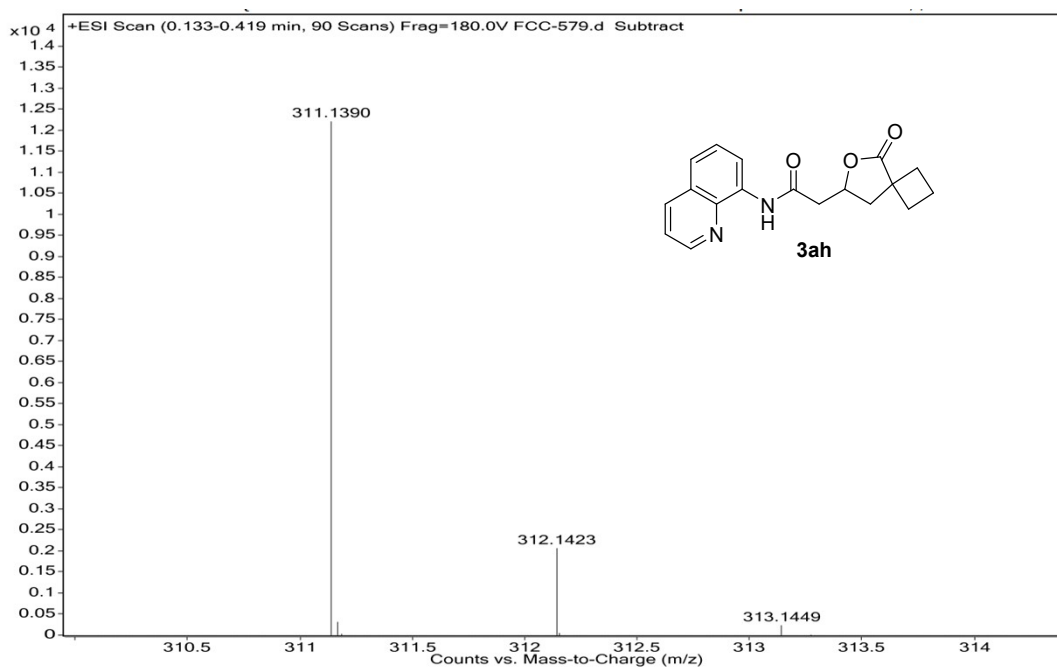

### $^1\text{H}$ NMR Spectra of **3ai**

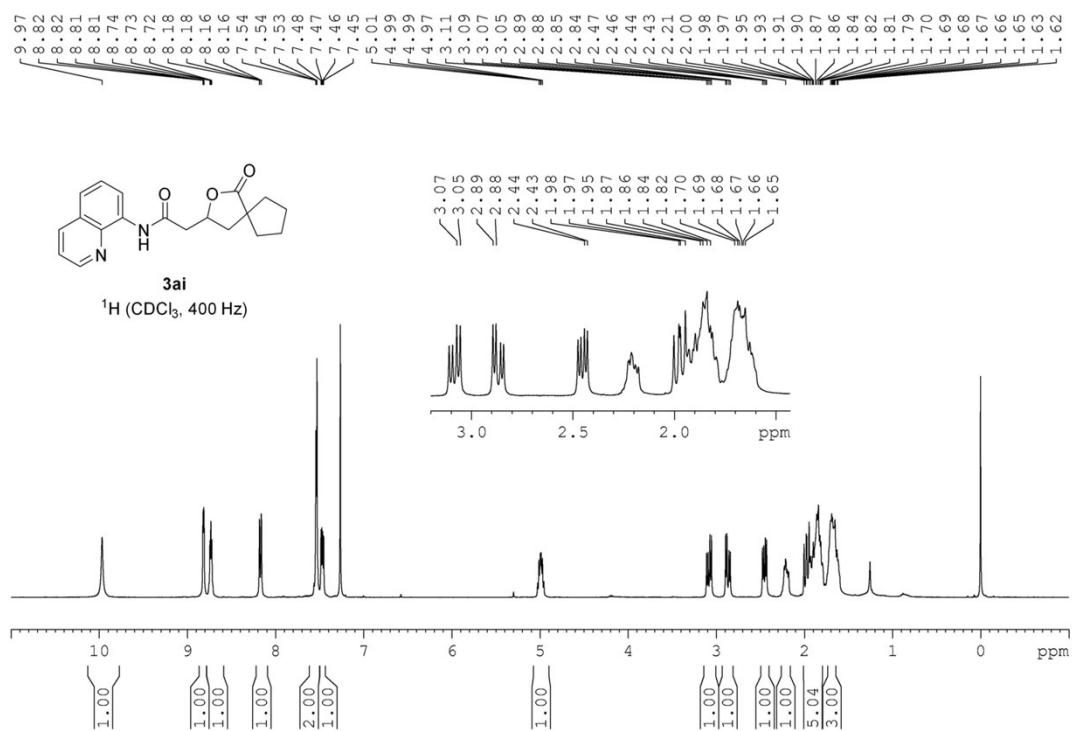

**<sup>13</sup>C NMR Spectra of 3ai**

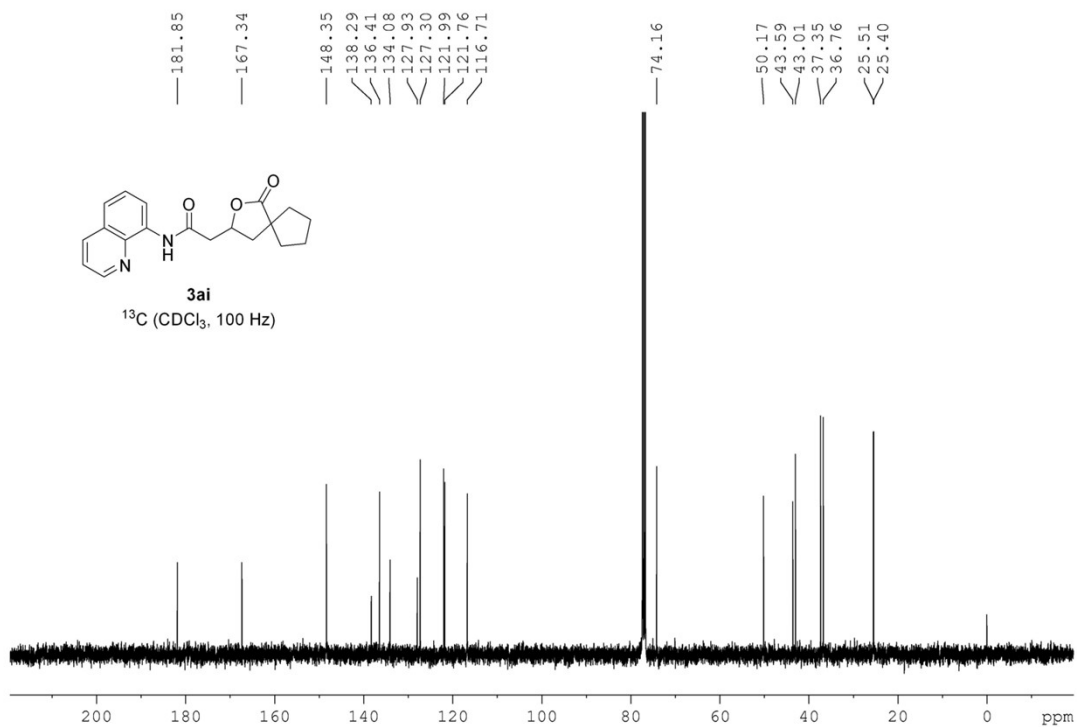

**HRMS Spectra of 3ai**

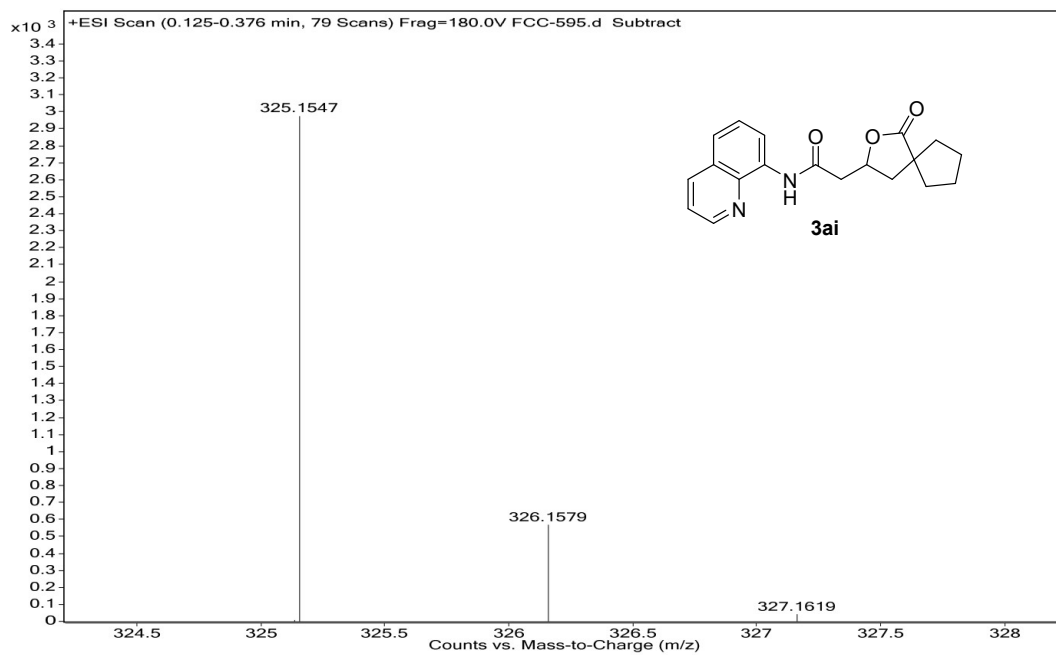

### <sup>1</sup>H NMR Spectra of **3aj**

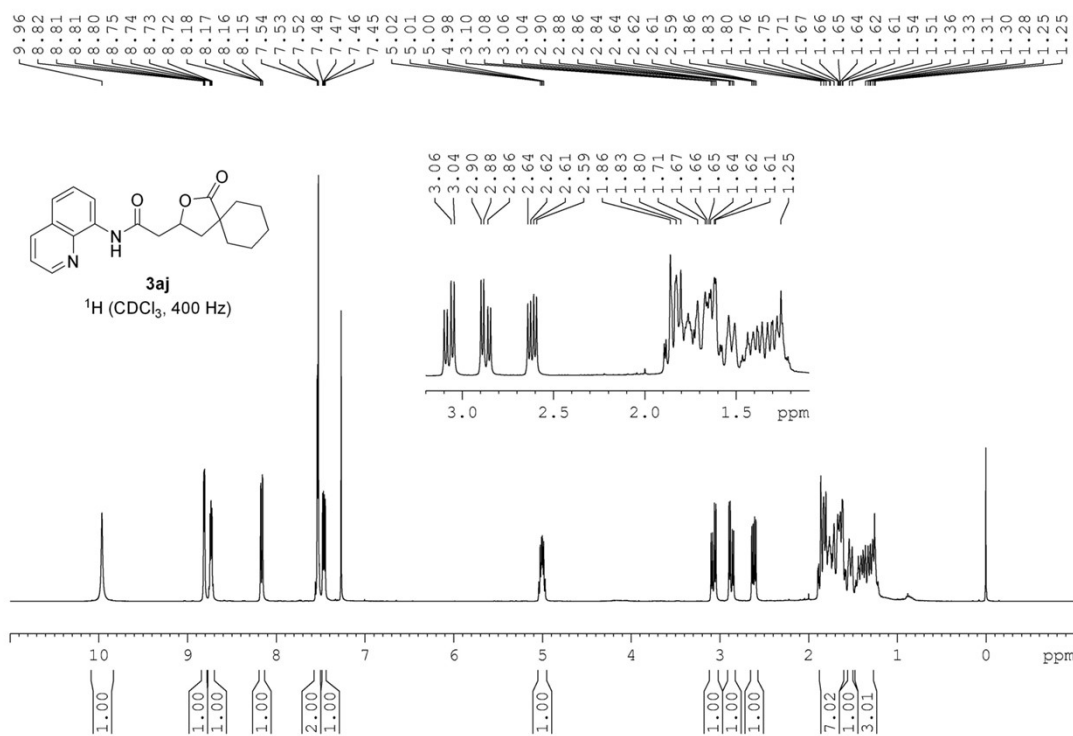

### <sup>13</sup>C NMR Spectra of **3aj**

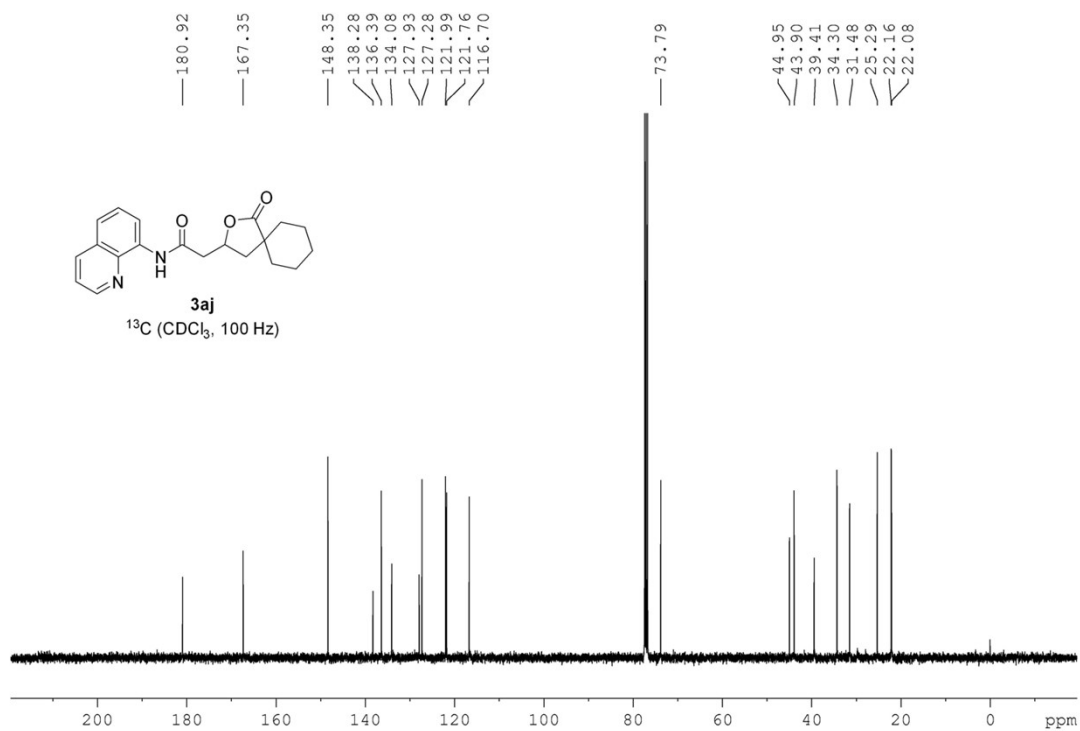

### HRMS Spectra of **3aj**

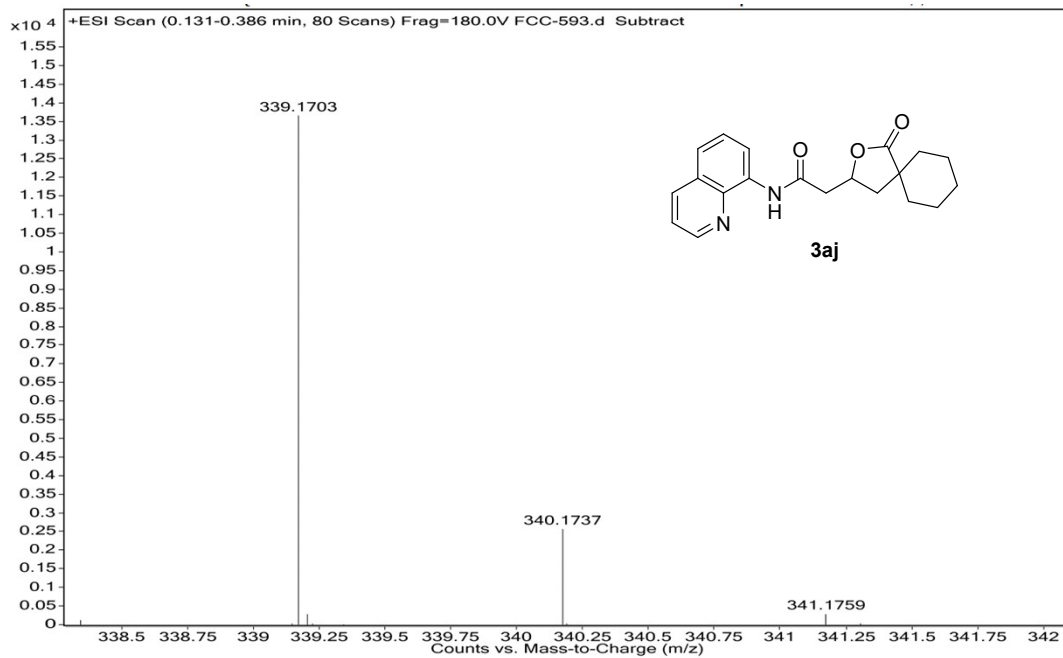

### $^1\text{H}$ NMR Spectra of **3ak**



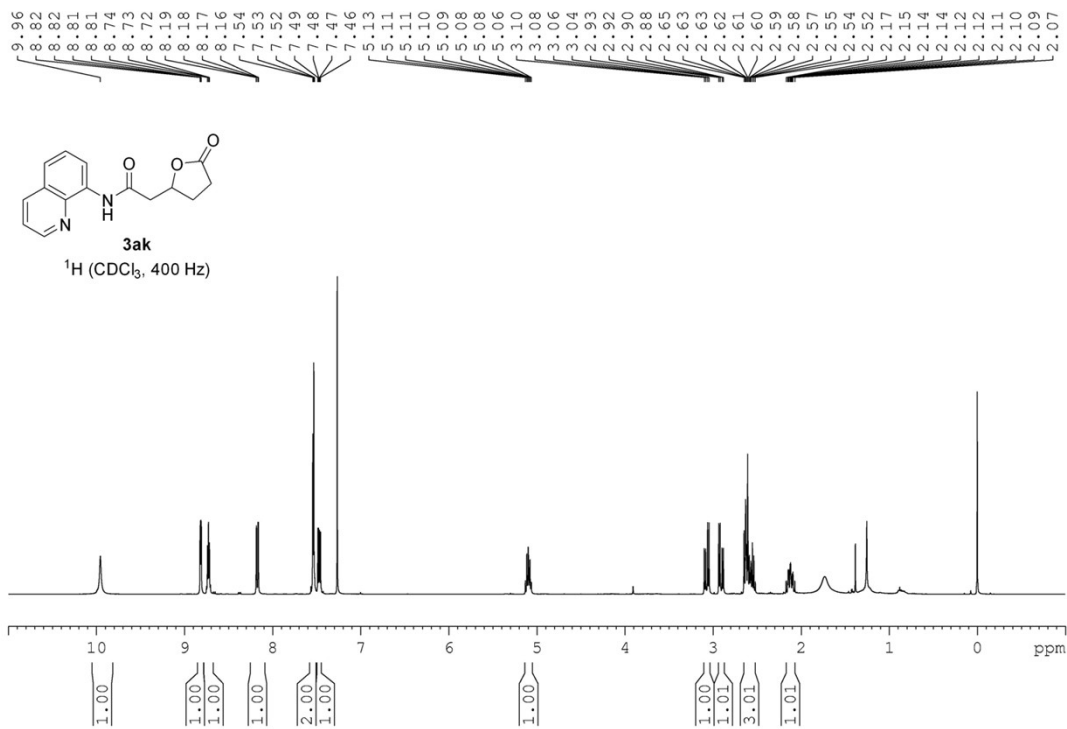

**<sup>13</sup>C NMR Spectra of 3ak**

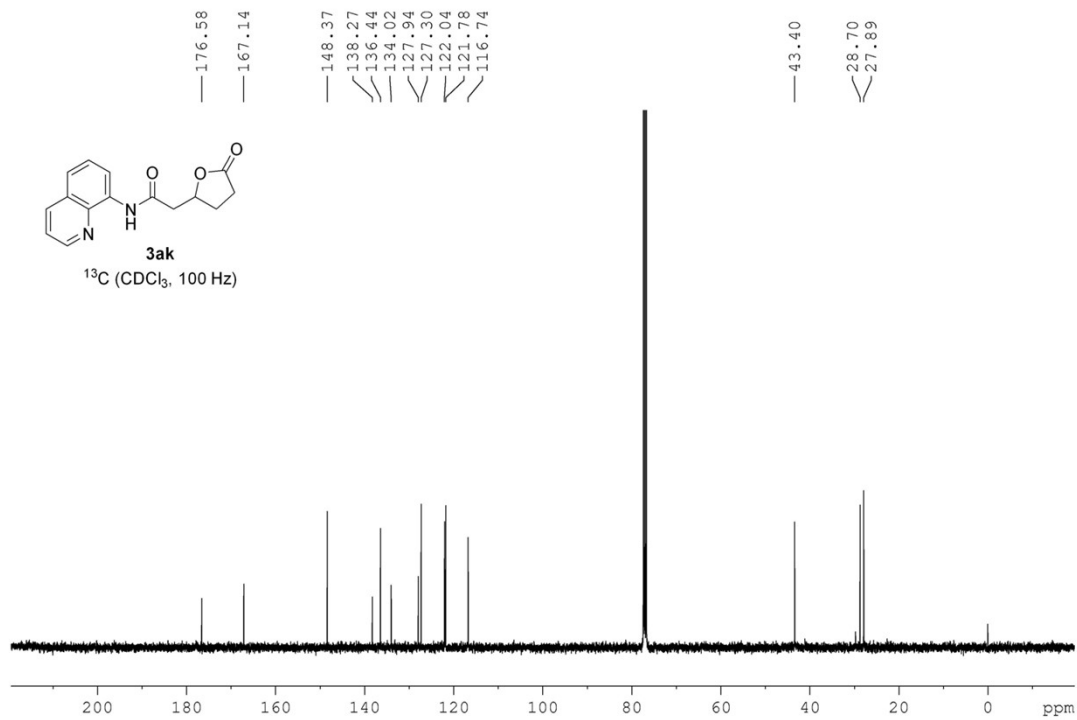

**HRMS Spectra of 3ak**

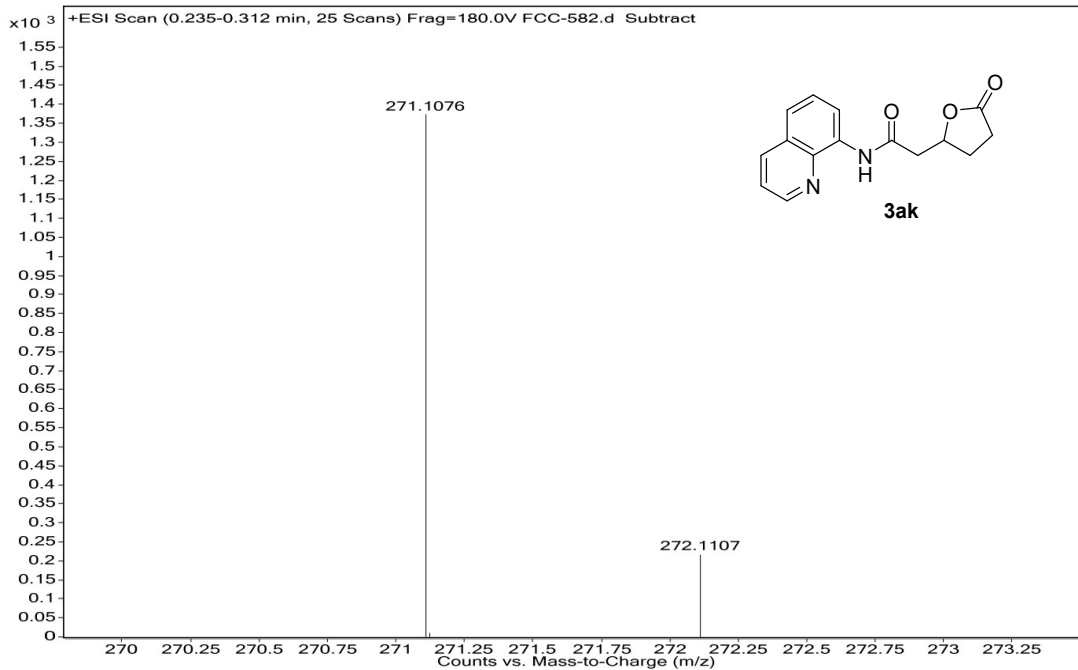

### <sup>1</sup>H NMR Spectra of **3al**

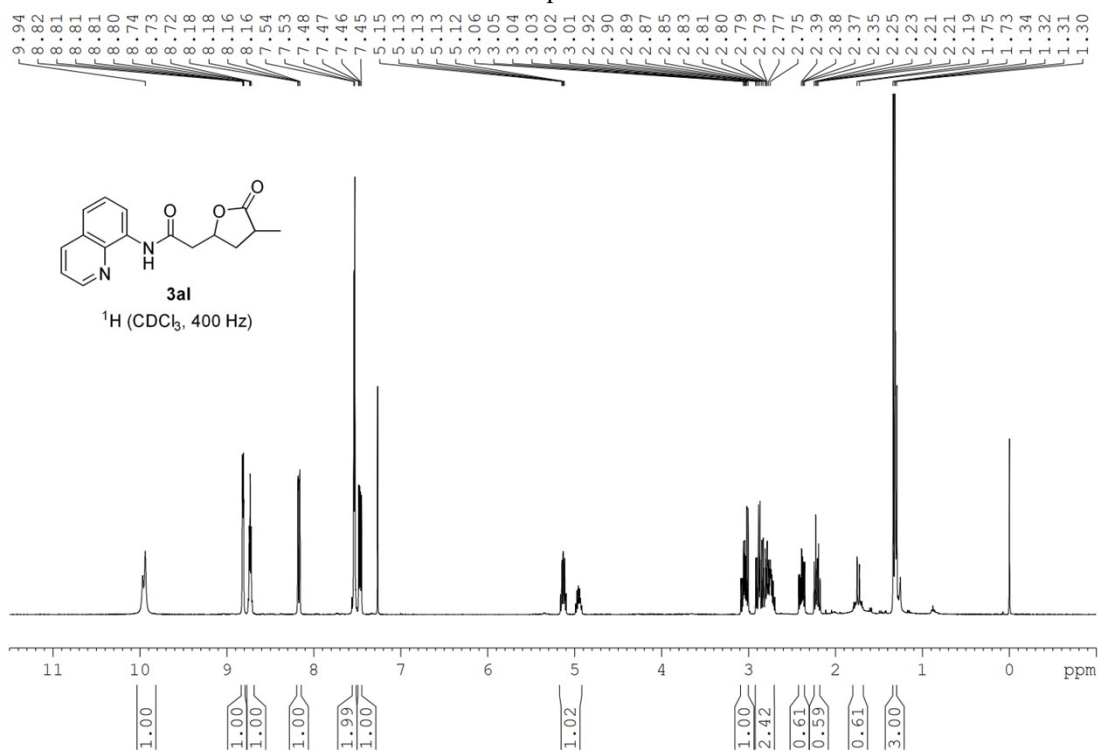

### <sup>13</sup>C NMR Spectra of **3al**

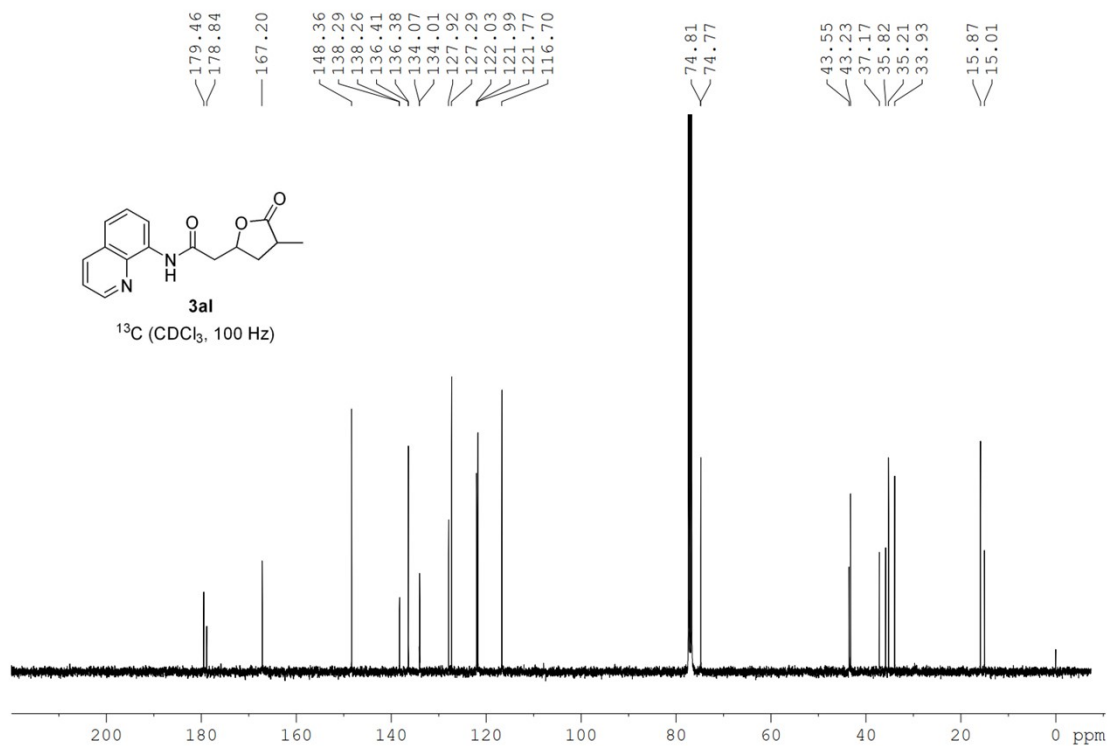

HRMS Spectra of **3al**

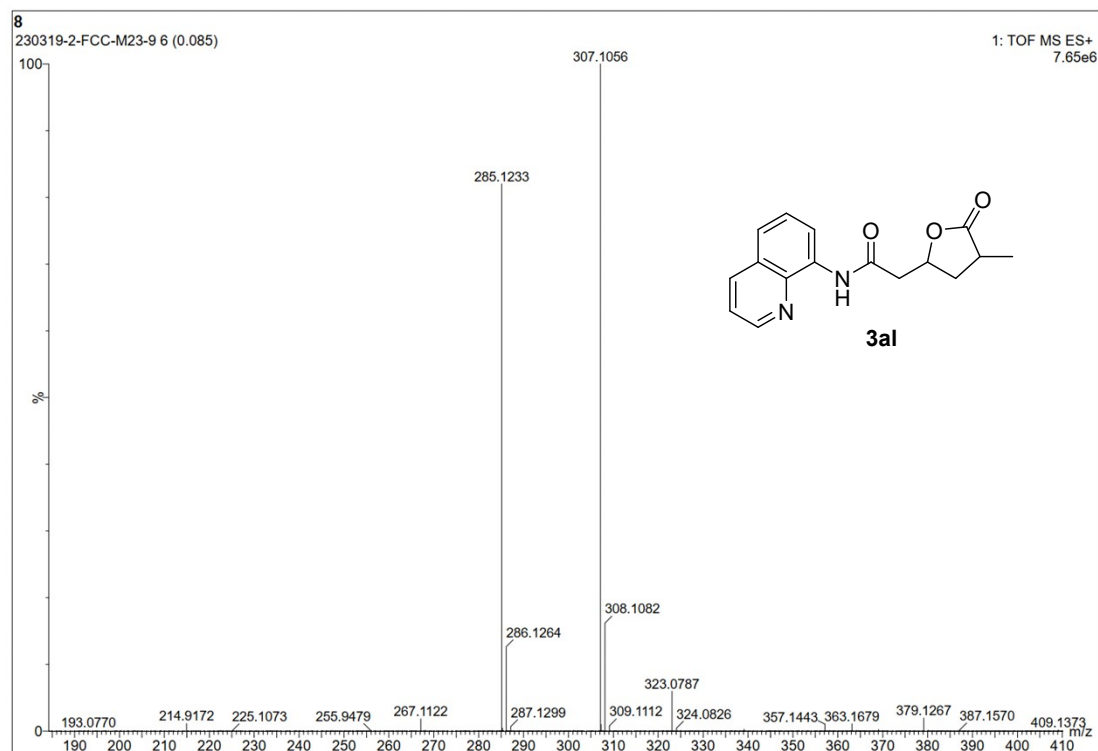

$^1\text{H}$  NMR Spectra of **3am**

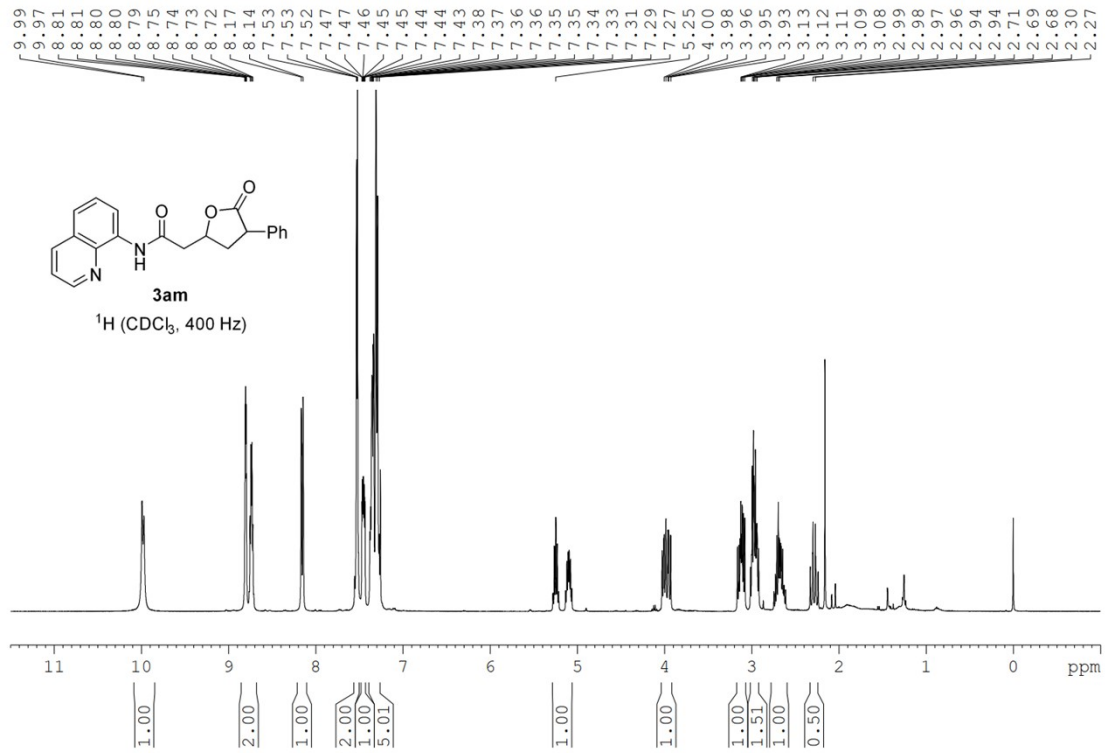

**<sup>13</sup>C NMR Spectra of 3am**

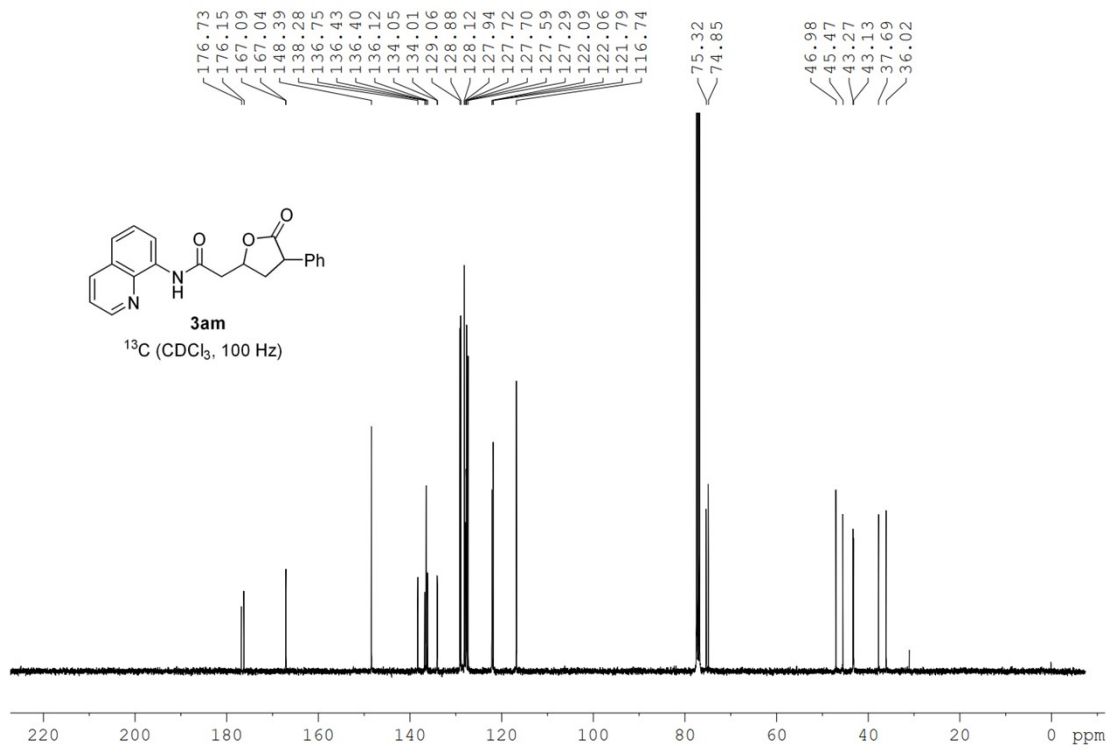

**HRMS Spectra of 3am**

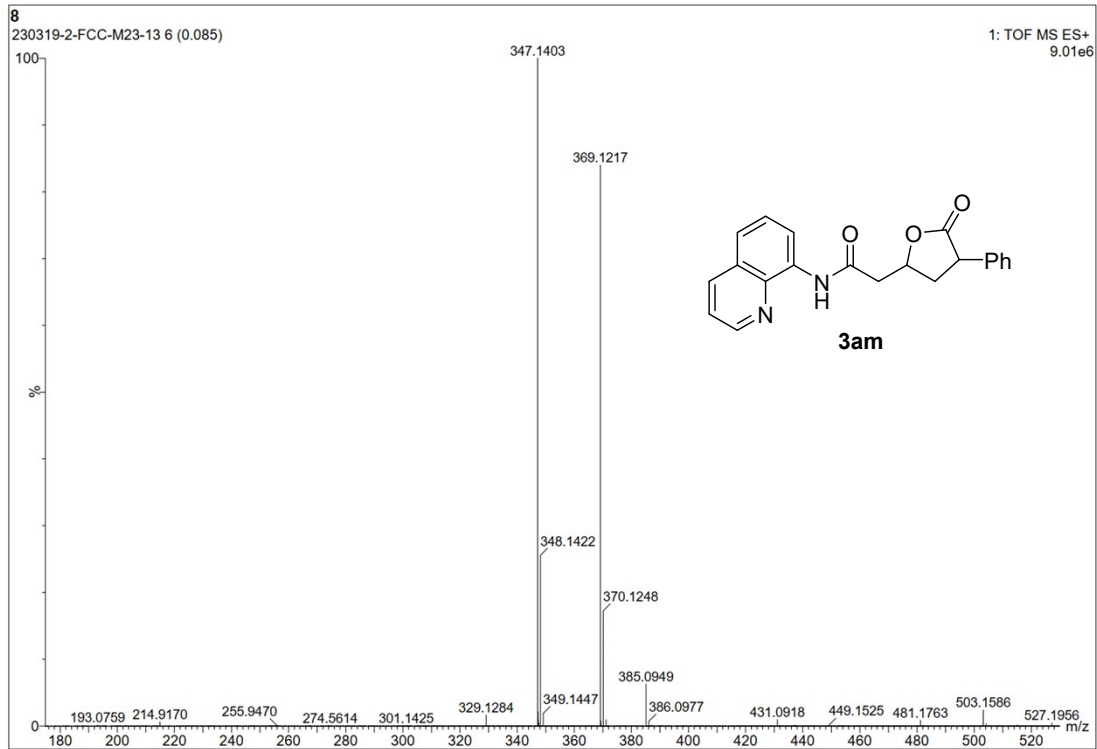

<sup>1</sup>H NMR Spectra of **3an**

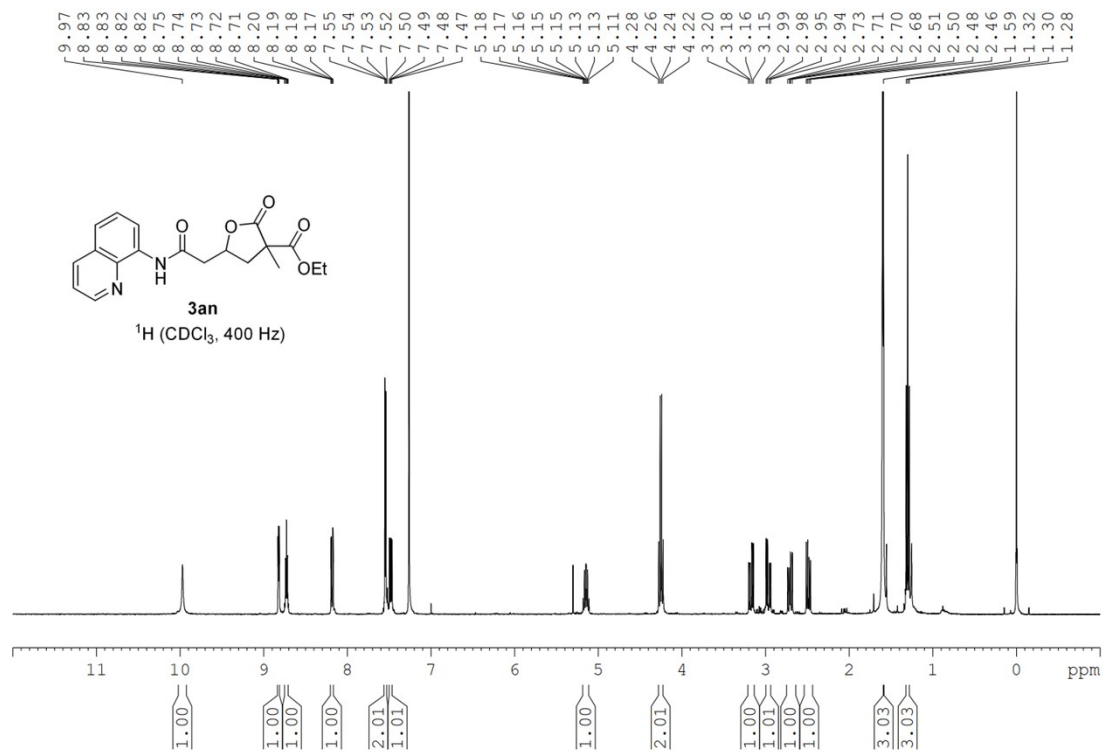

<sup>13</sup>C NMR Spectra of **3an**

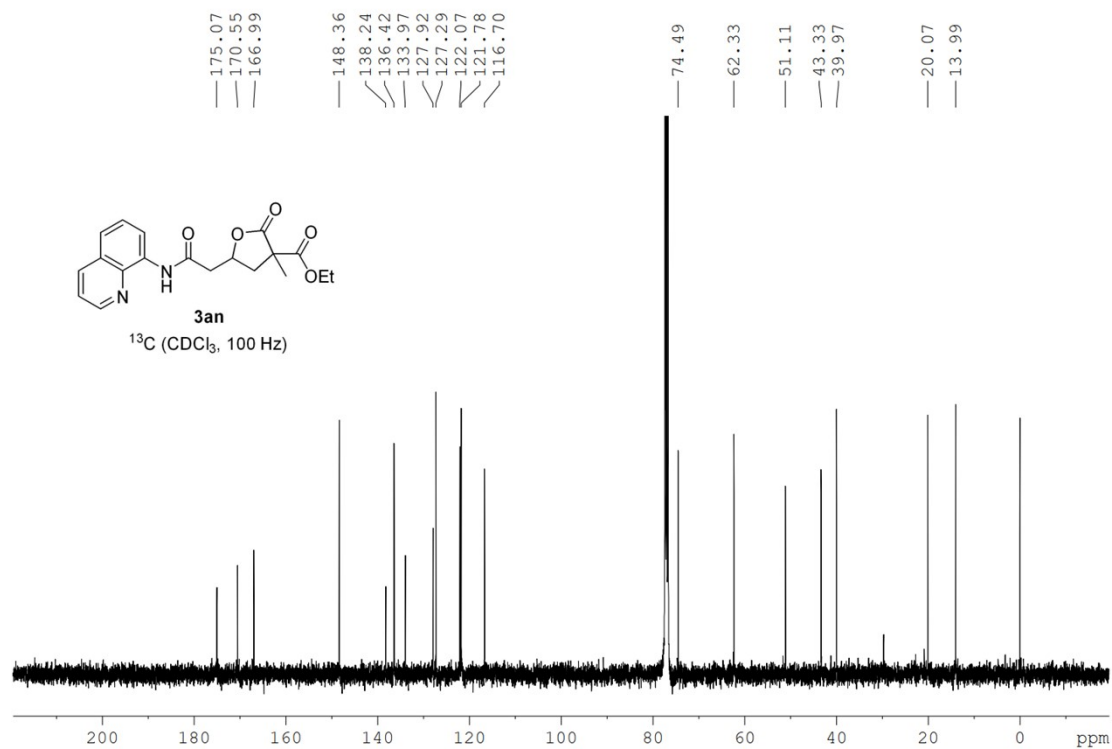

HRMS Spectra of **3an**

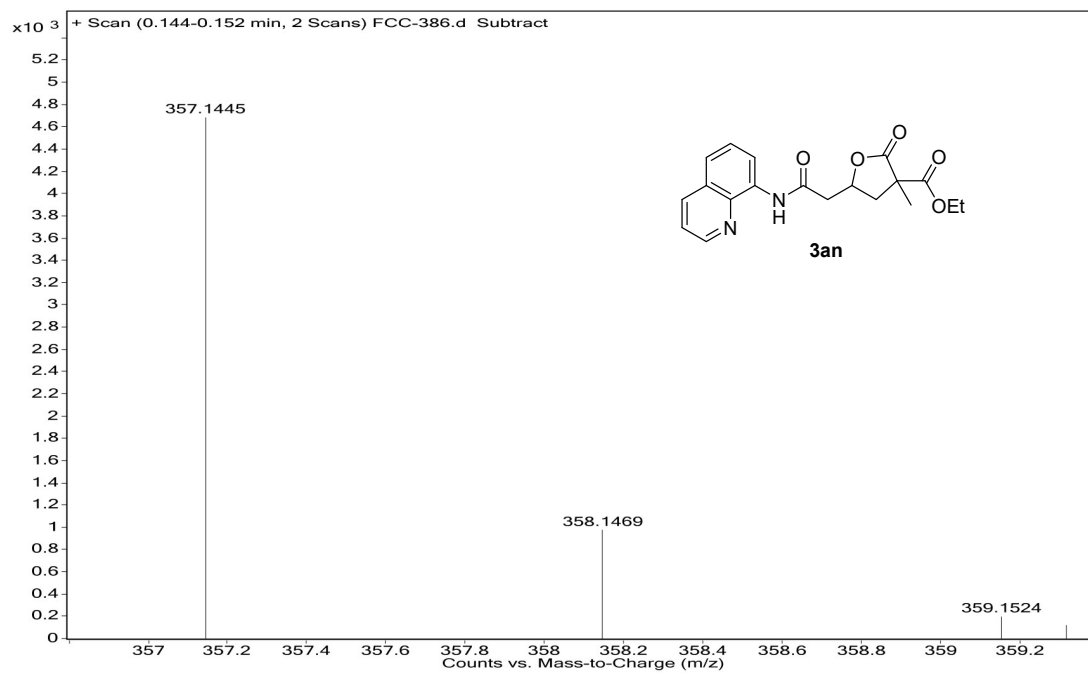

$^1\text{H}$  NMR Spectra of **3ba**

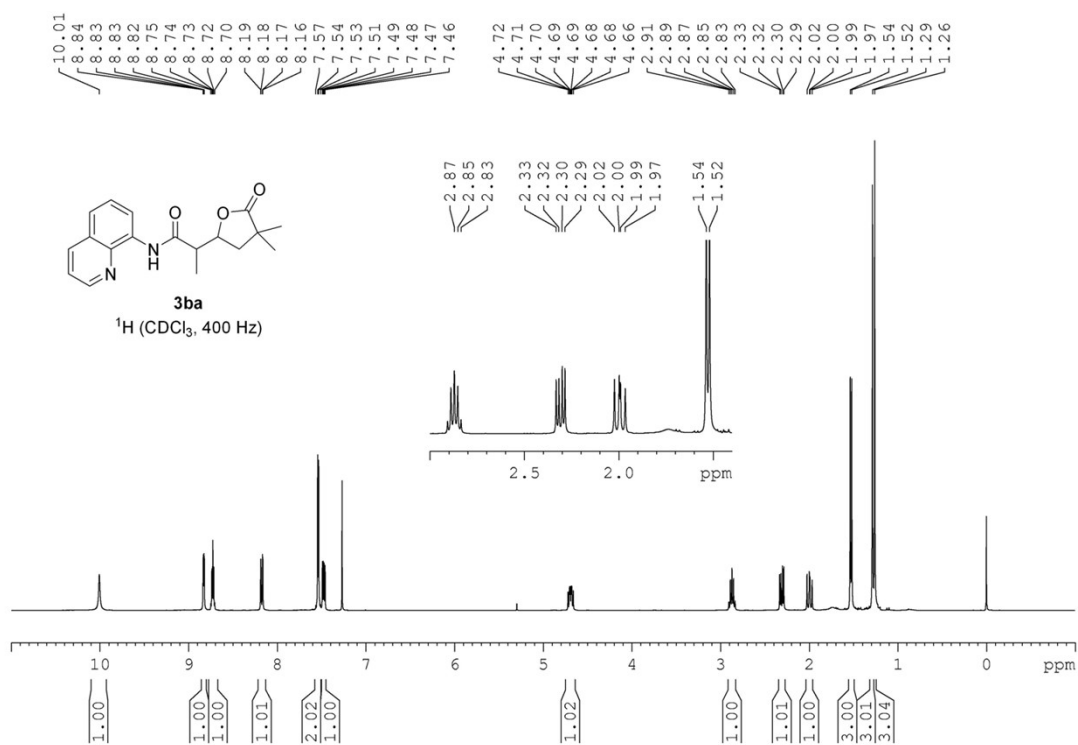

### <sup>13</sup>C NMR Spectra of **3ba**

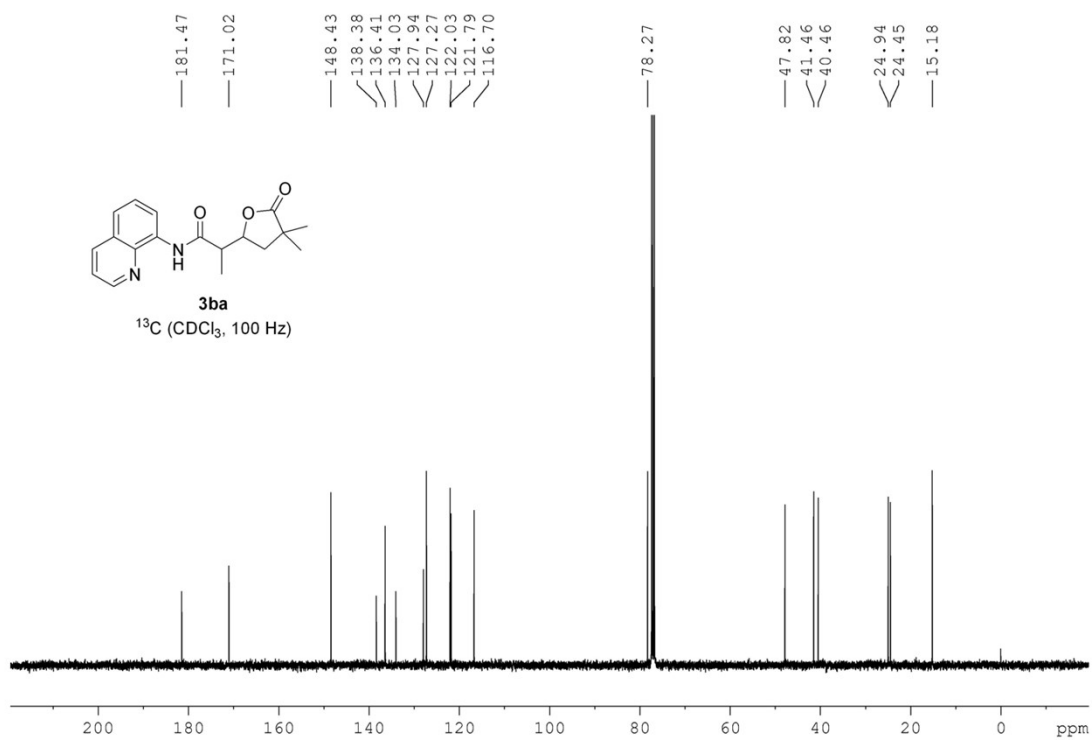

### HRMS Spectra of **3ba**

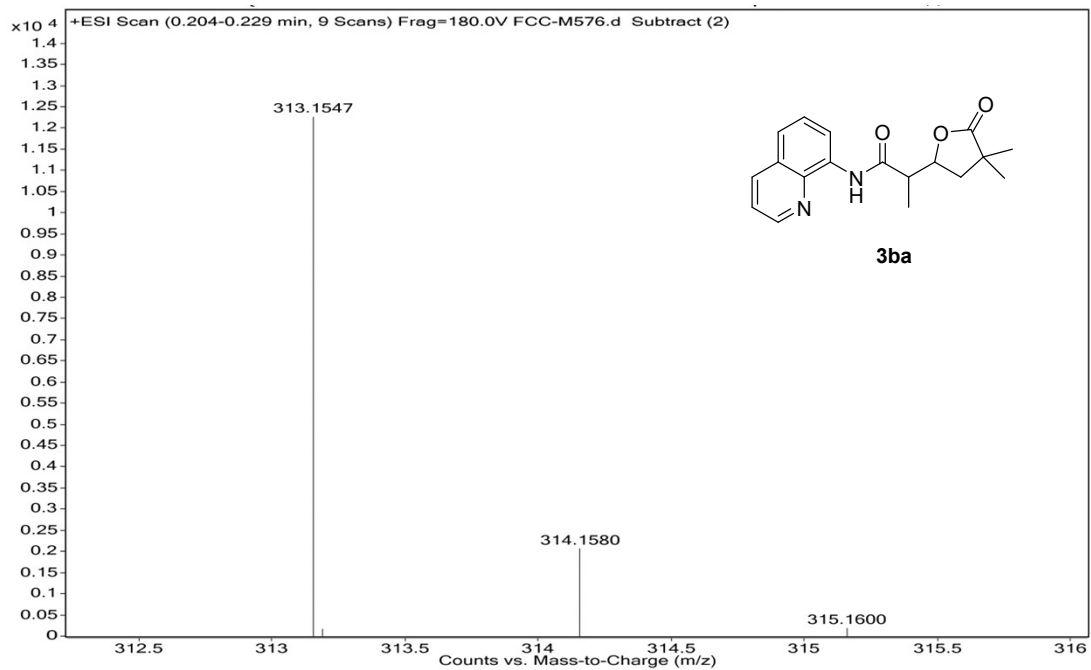

### <sup>1</sup>H NMR Spectra of **3ca**

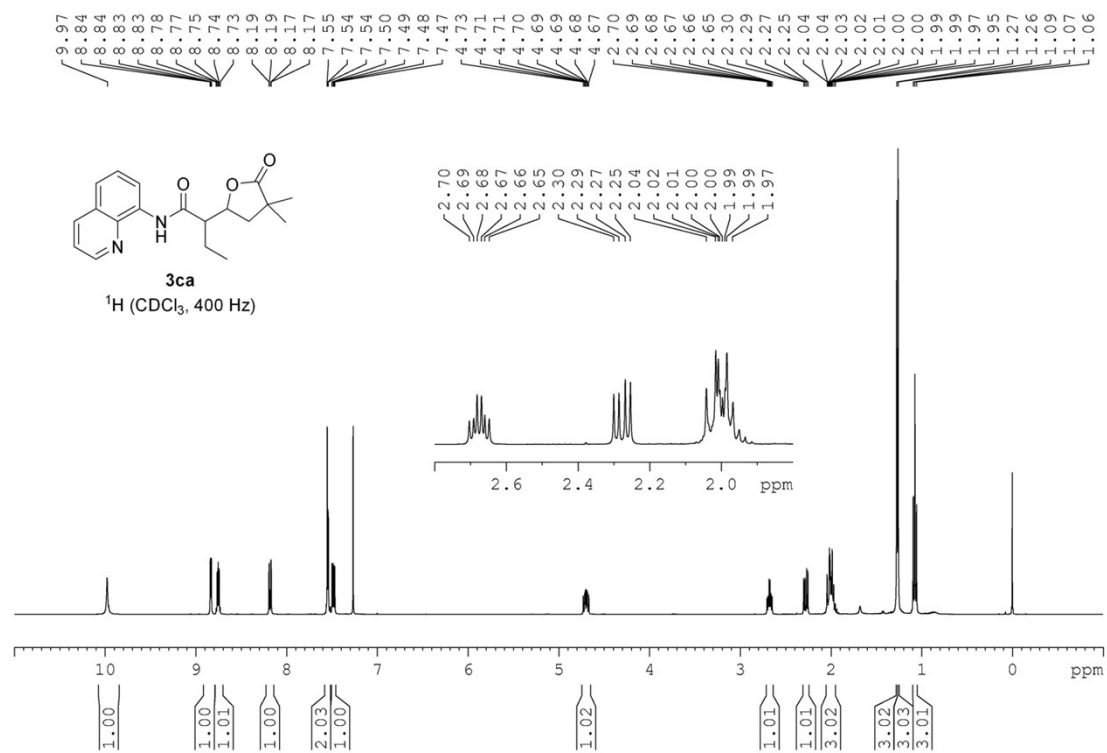

### <sup>13</sup>C NMR Spectra of **3ca**



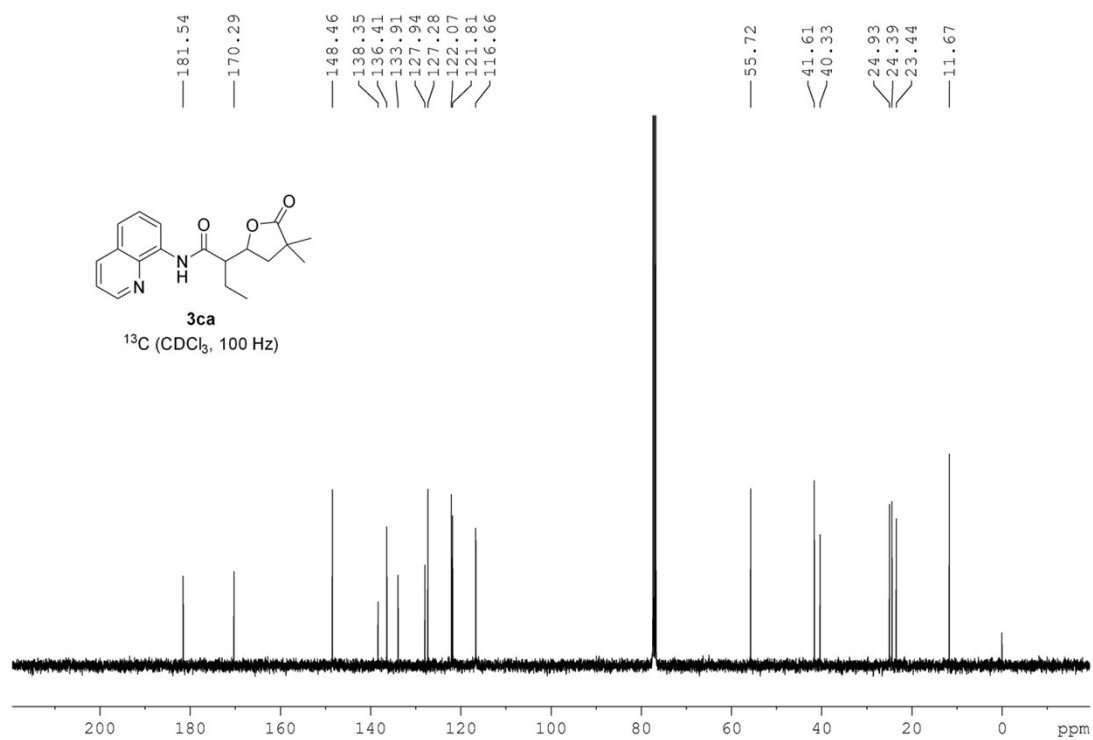

### HRMS Spectra of 3ca

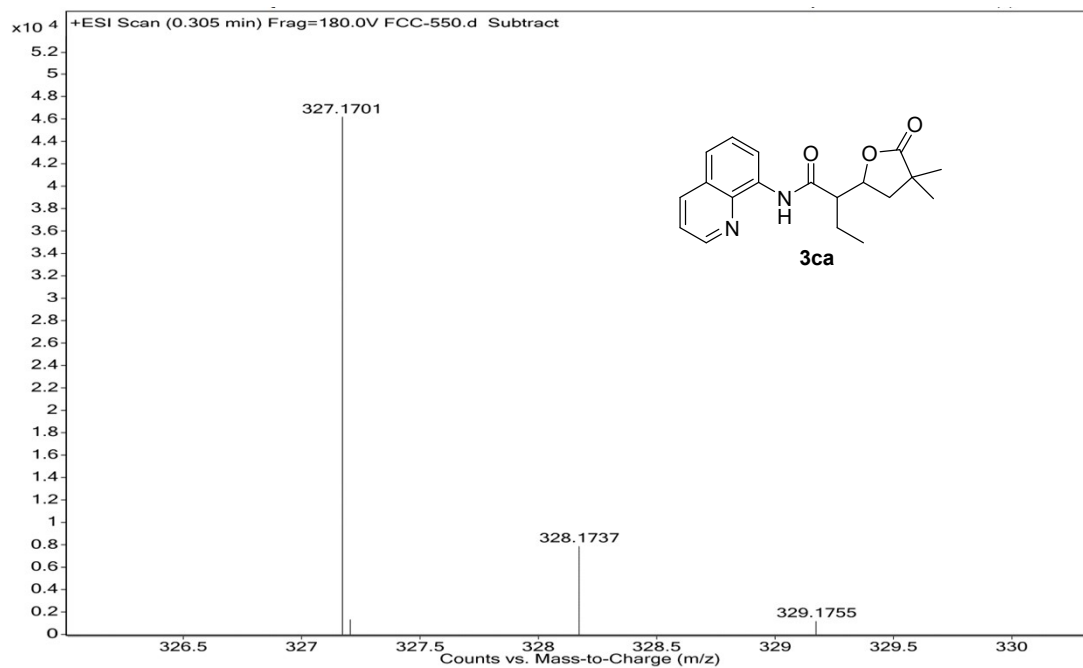

### $^1\text{H}$ NMR Spectra of 3da

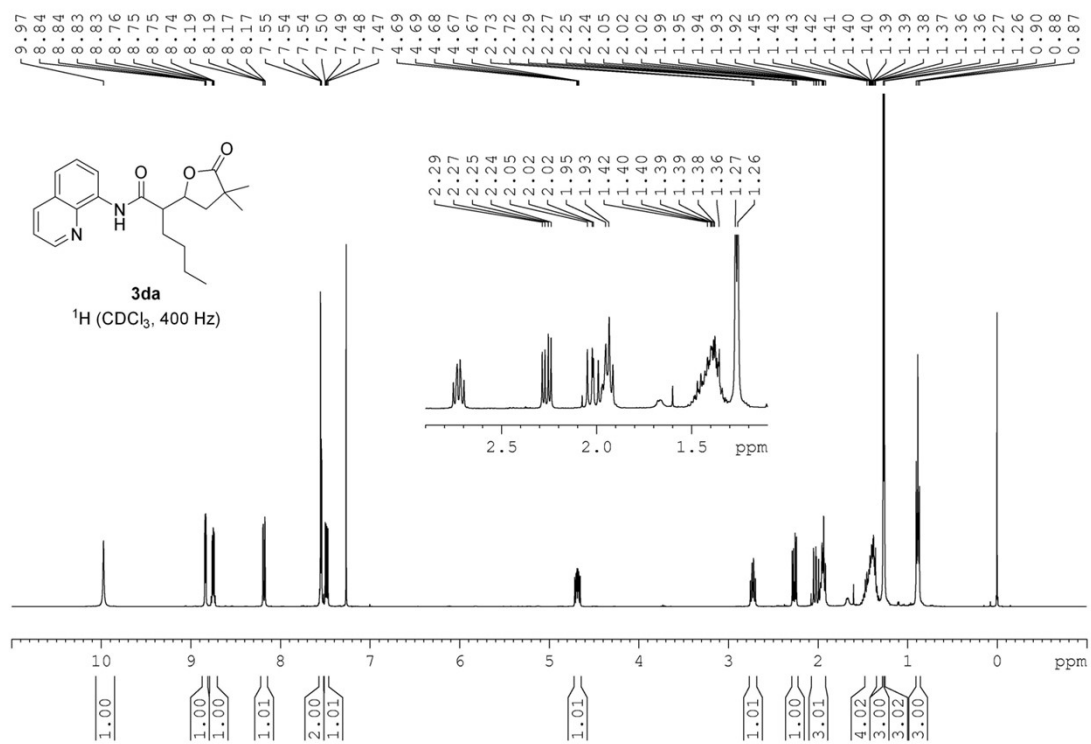

**<sup>13</sup>C NMR Spectra of 3da**

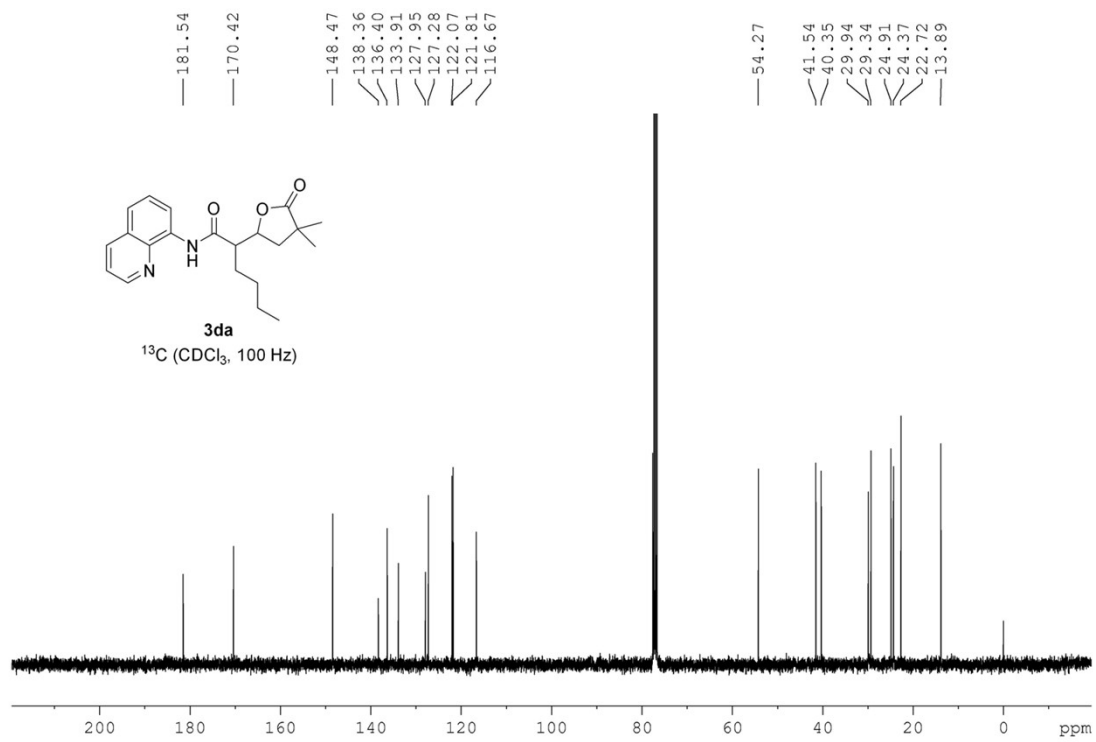

**HRMS Spectra of 3da**

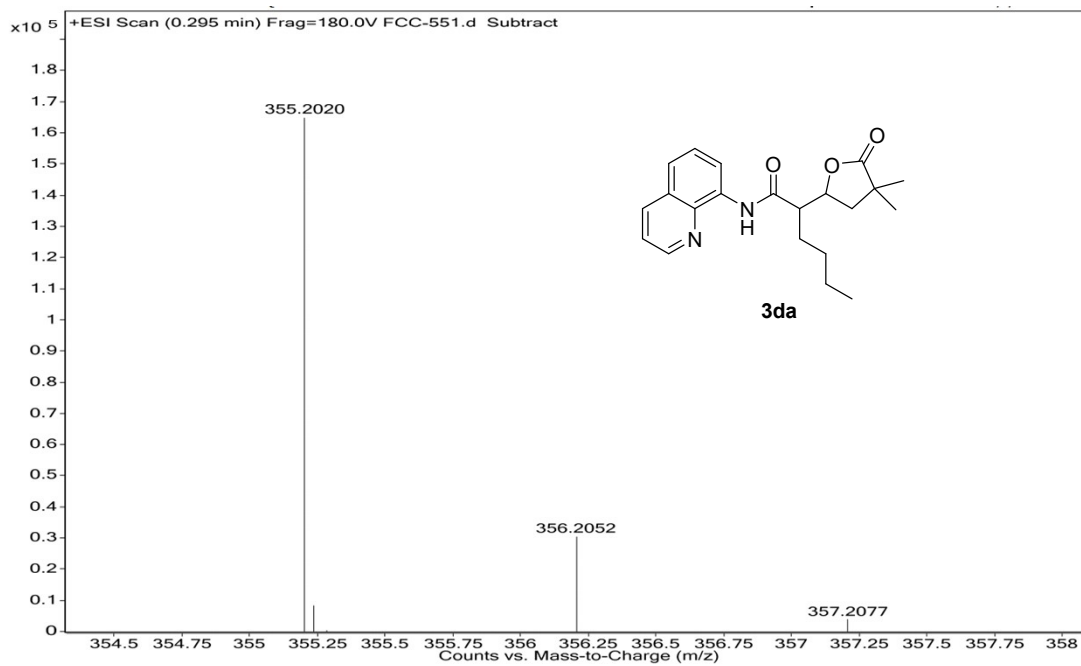

### <sup>1</sup>H NMR Spectra of 3ea

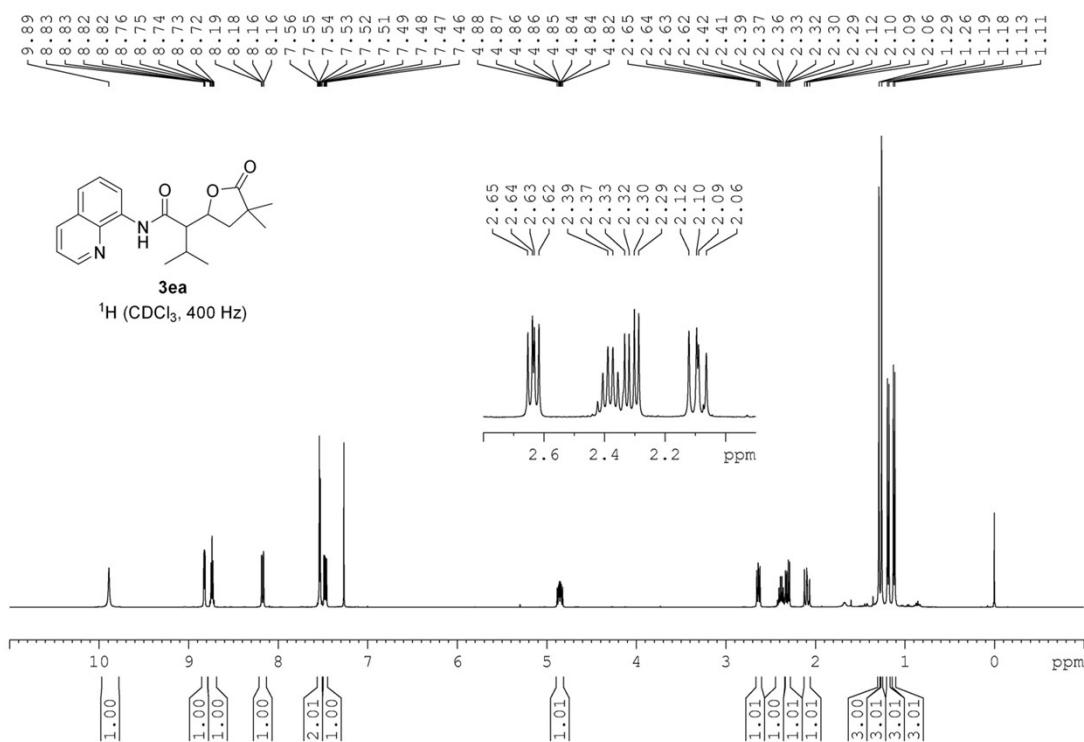

### <sup>13</sup>C NMR Spectra of 3ea

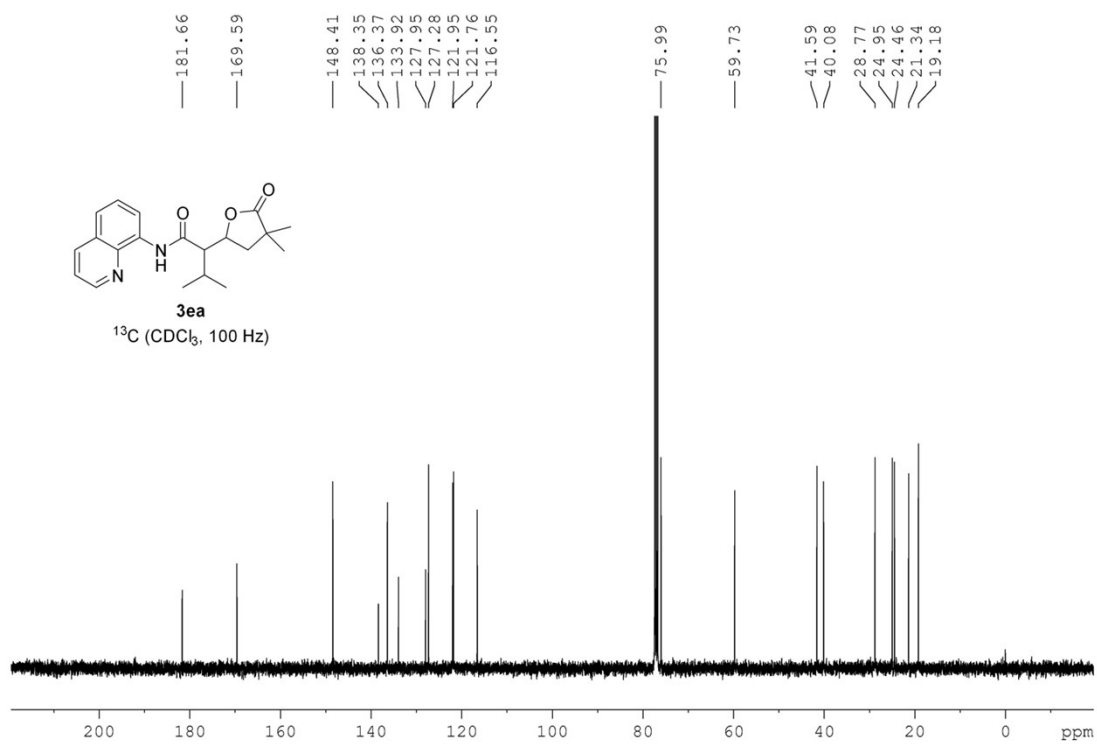

### HRMS Spectra of **3ea**

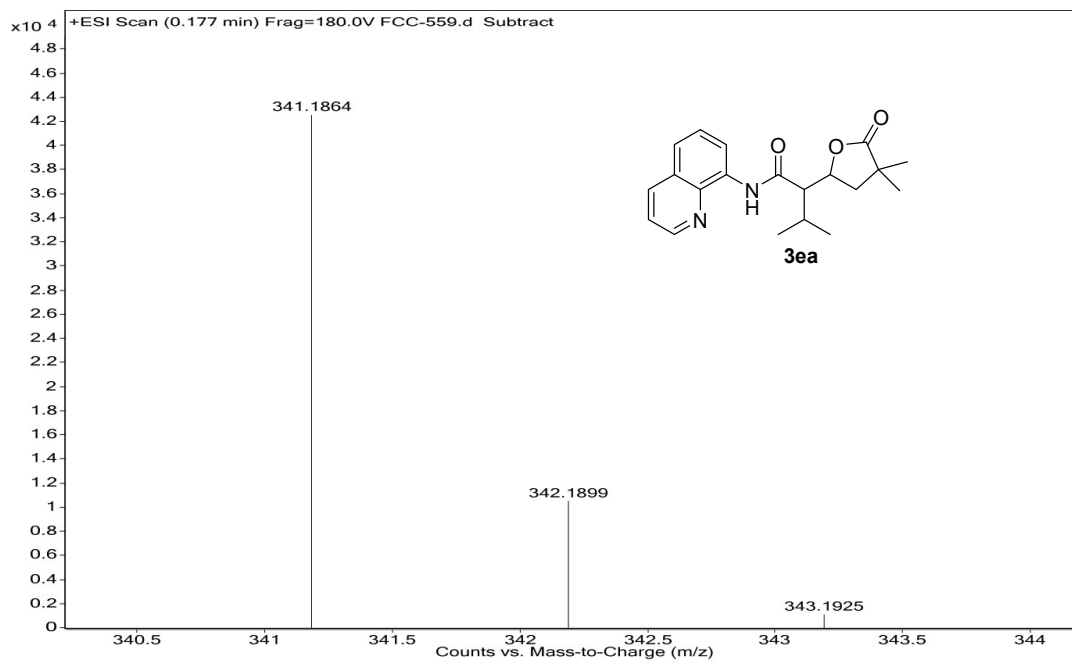

### $^1\text{H}$ NMR Spectra of **3fa**

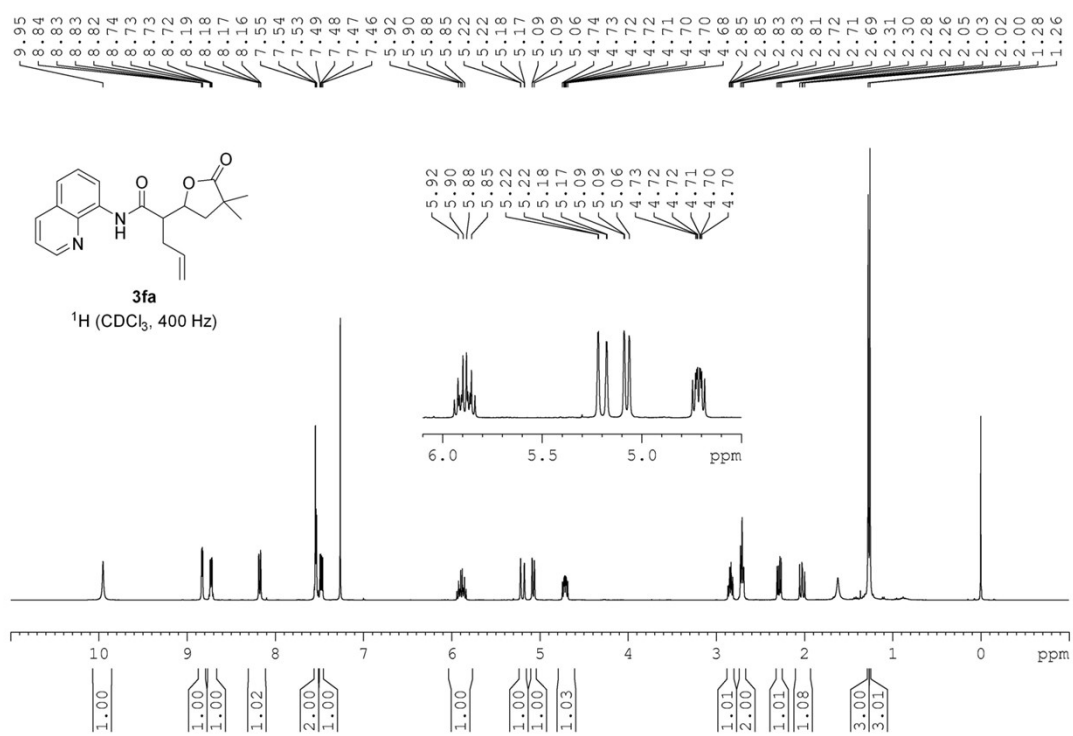

**$^{13}\text{C}$  NMR Spectra of 3fa**

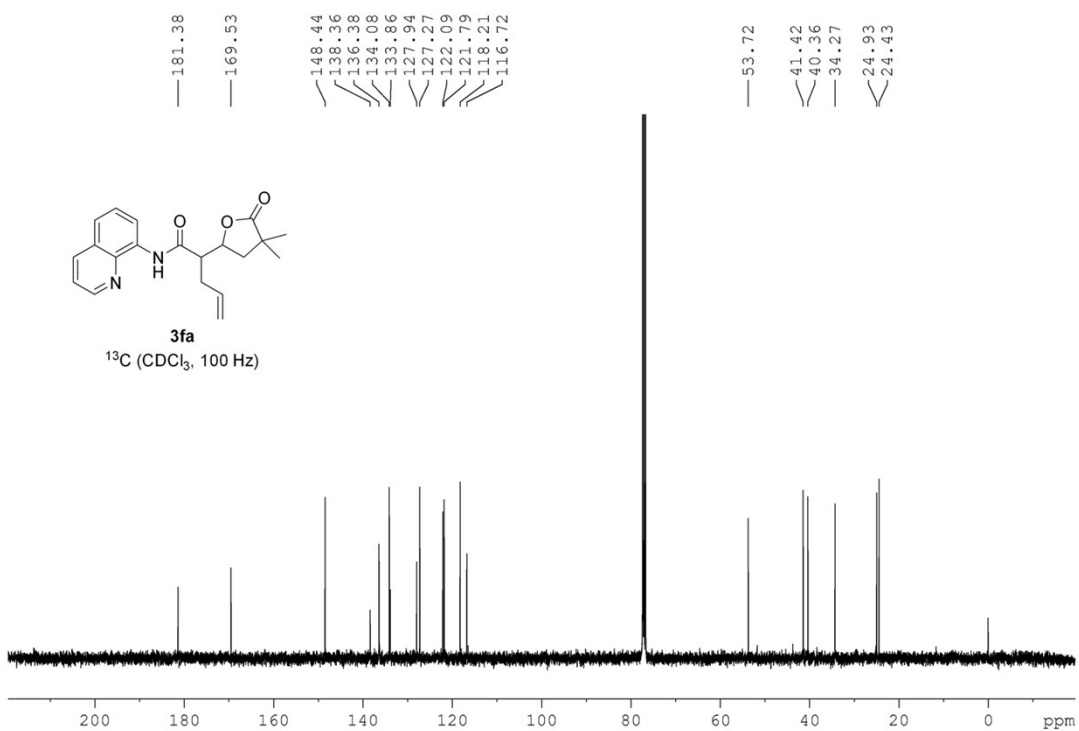

**HRMS Spectra of 3fa**

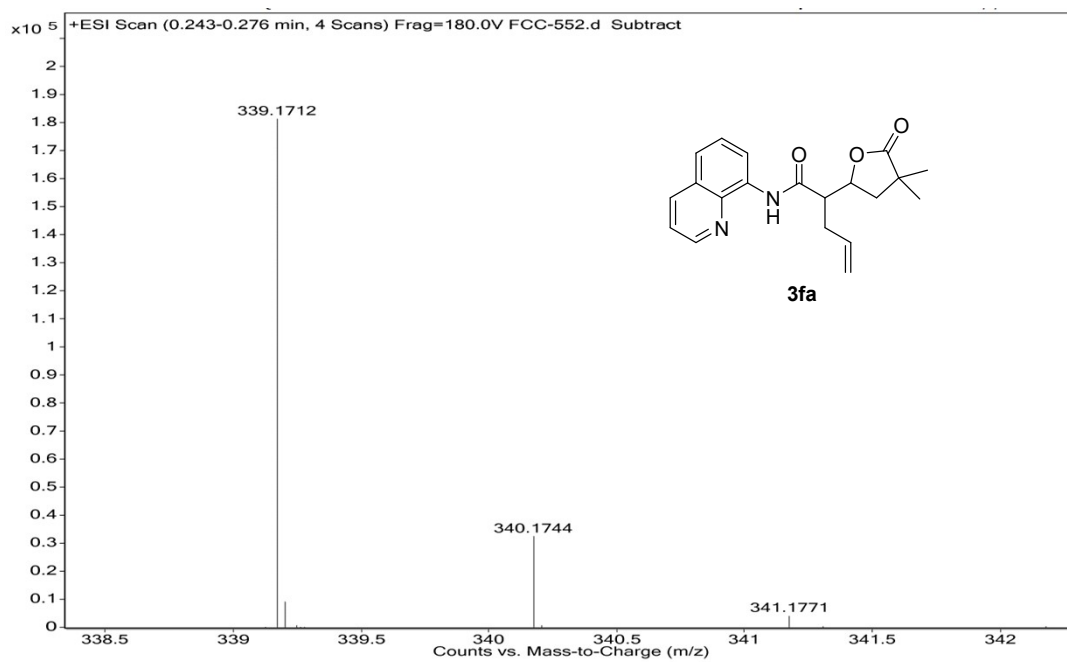

<sup>1</sup>H NMR Spectra of **3ga**

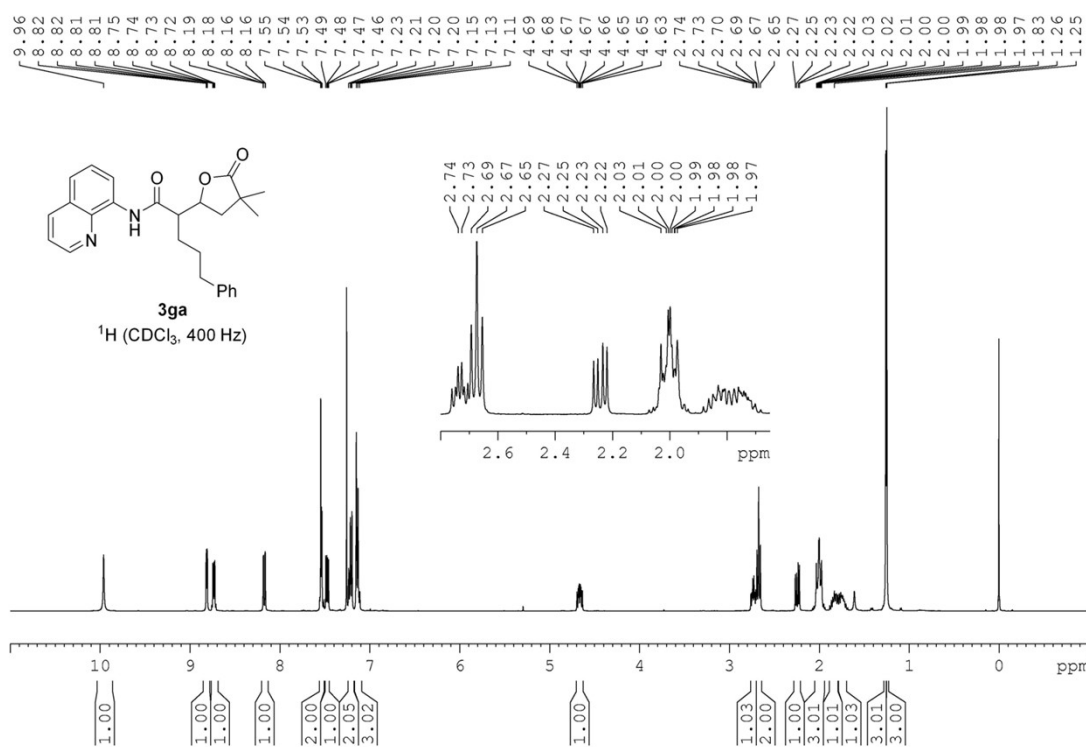

<sup>13</sup>C NMR Spectra of **3ga**

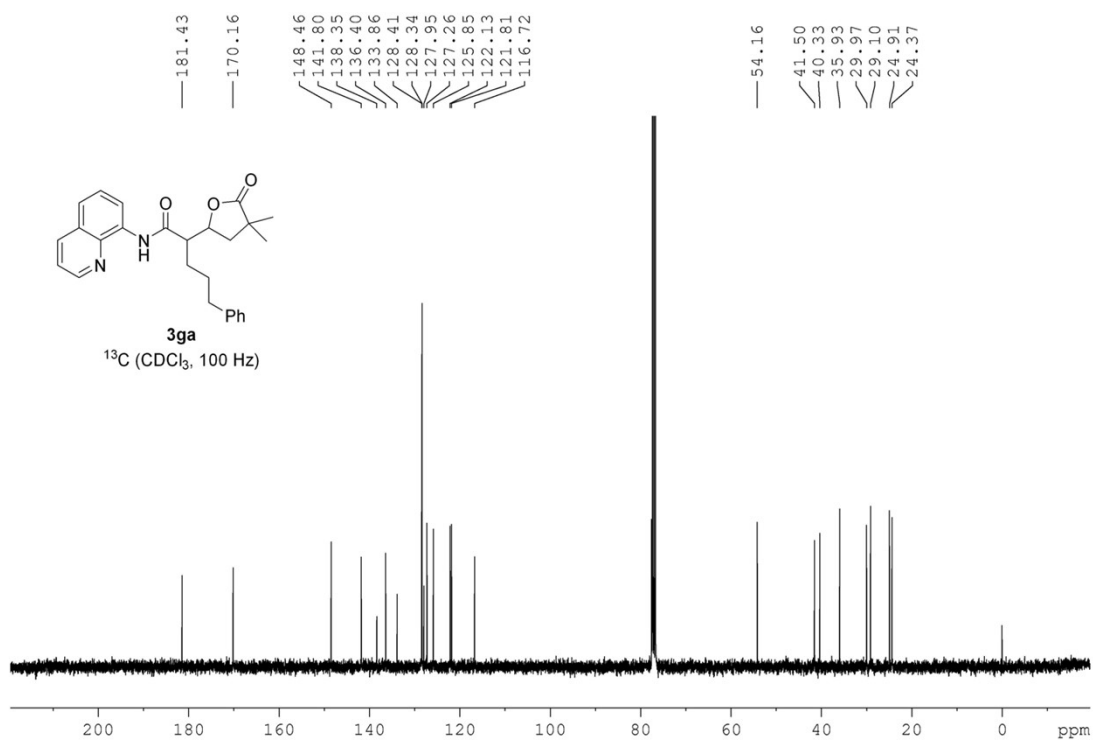

### HRMS Spectra of 3ga

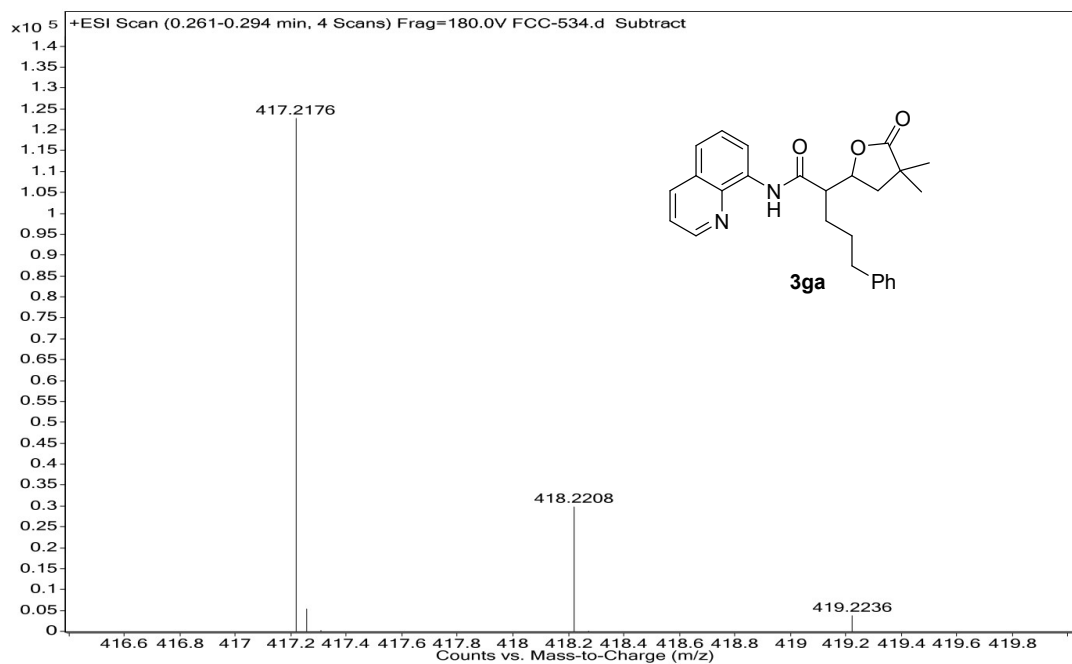

### <sup>1</sup>H NMR Spectra of 3ha





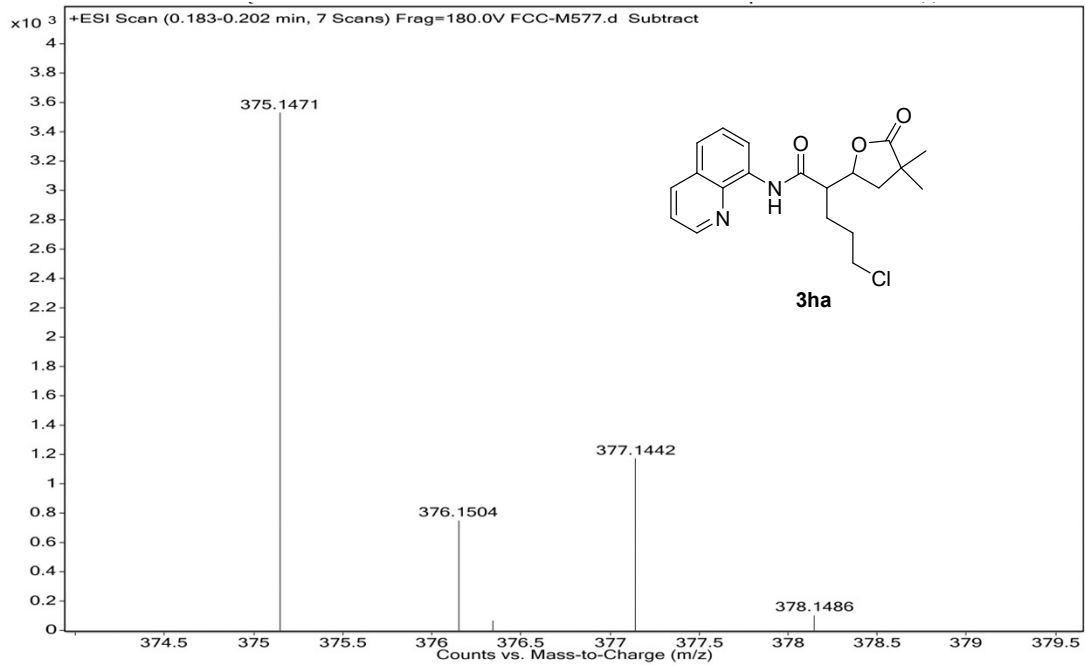

<sup>1</sup>H NMR Spectra of **3ia**

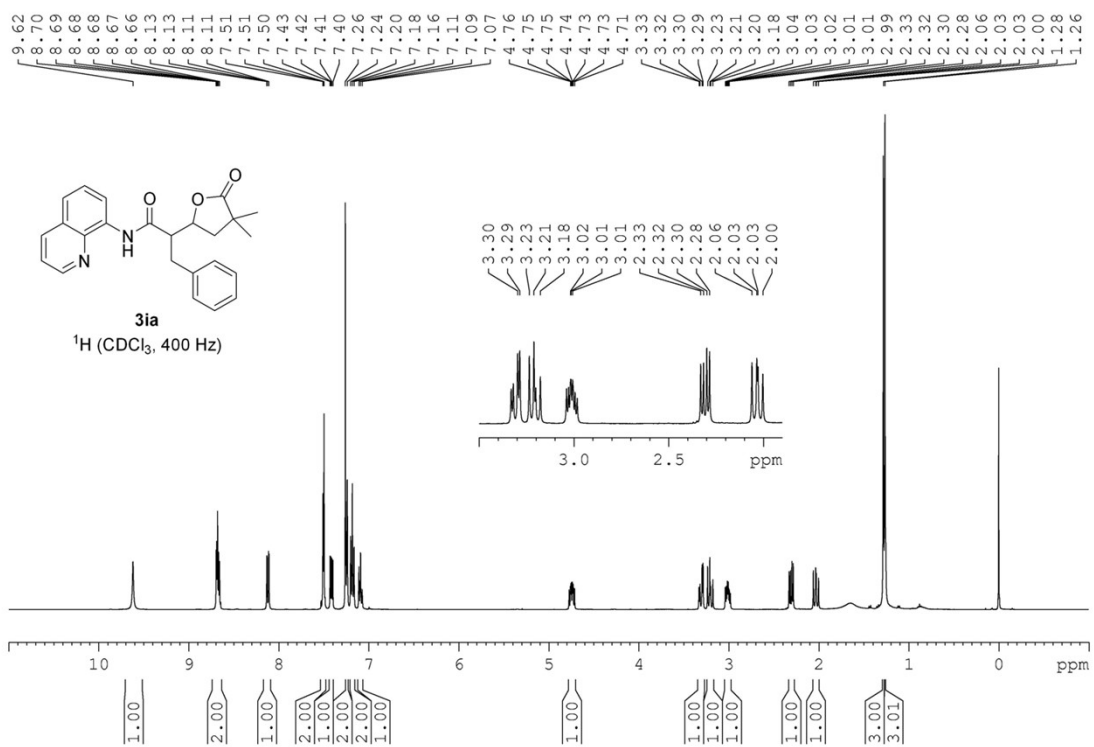

<sup>13</sup>C NMR Spectra of **3ia**

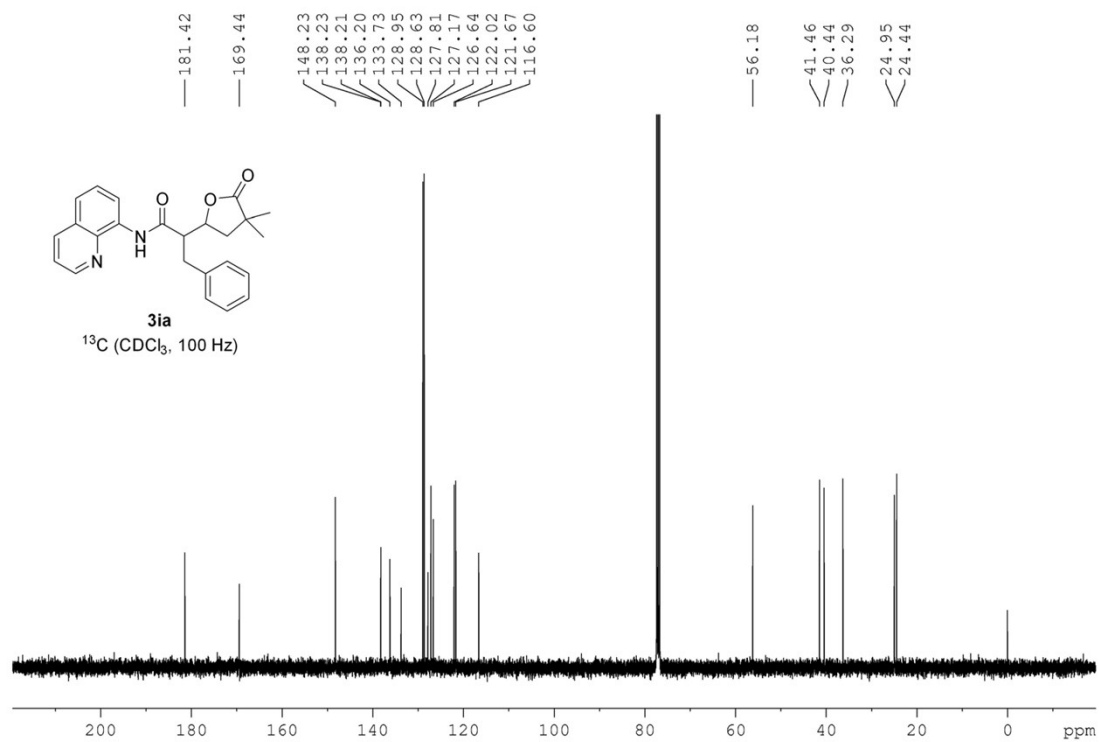

### HRMS Spectra of **3ia**

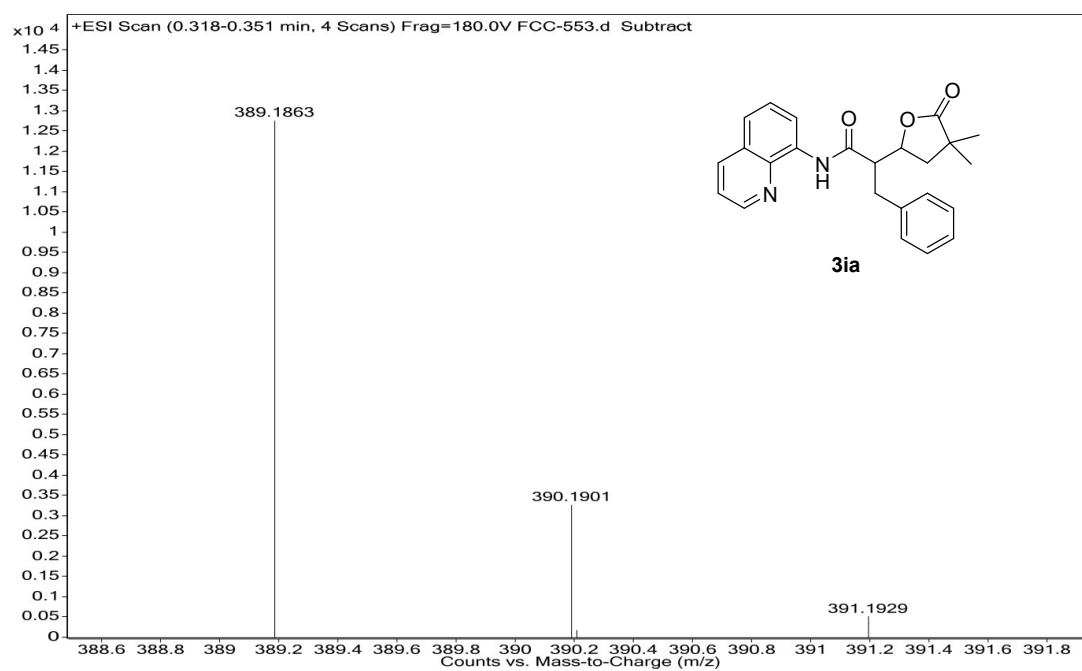

### <sup>1</sup>H NMR Spectra of **3ja**

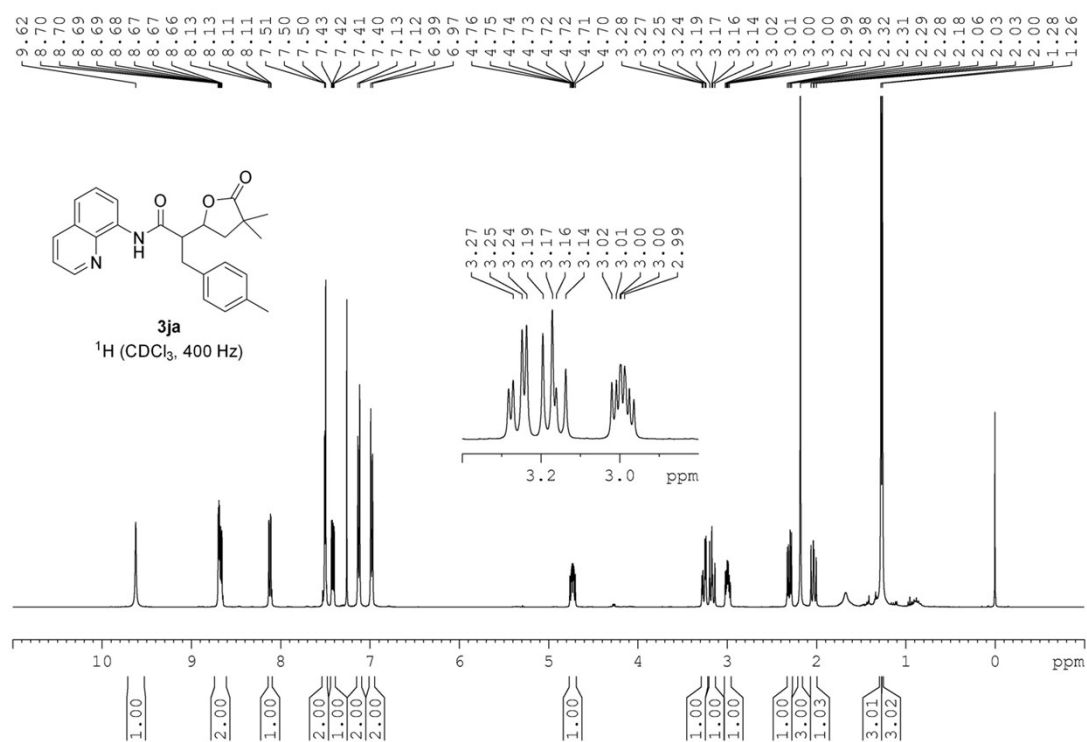

**<sup>13</sup>C NMR Spectra of 3ja**

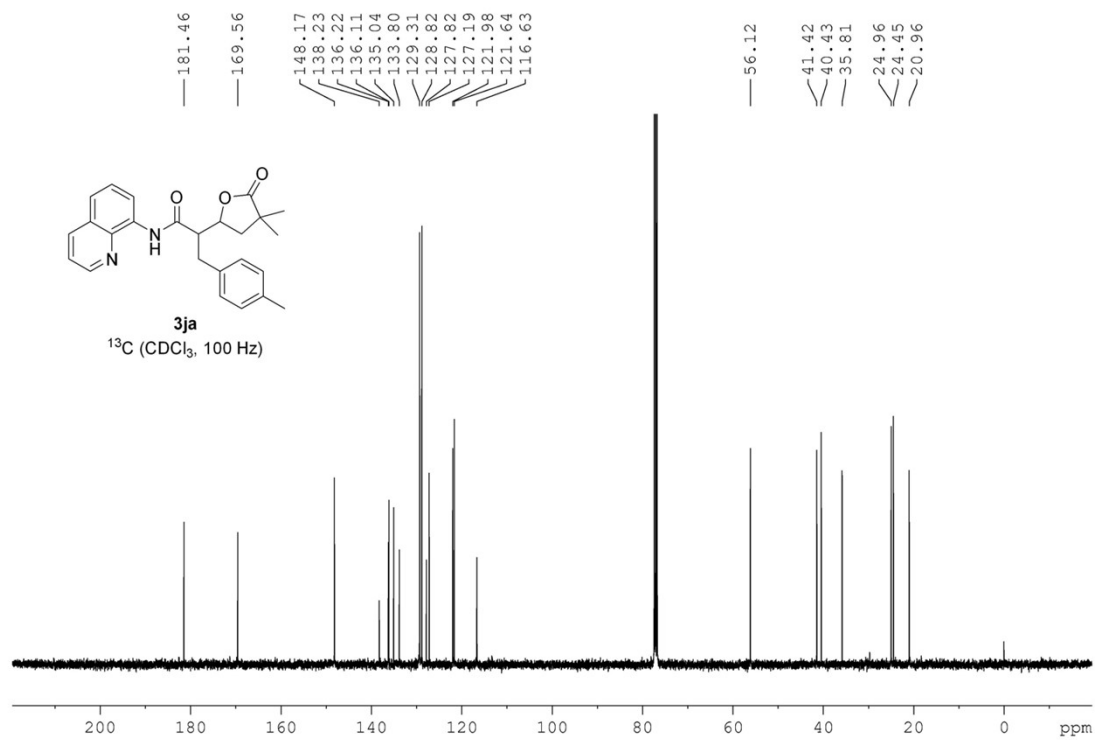

**HRMS Spectra of 3ja**

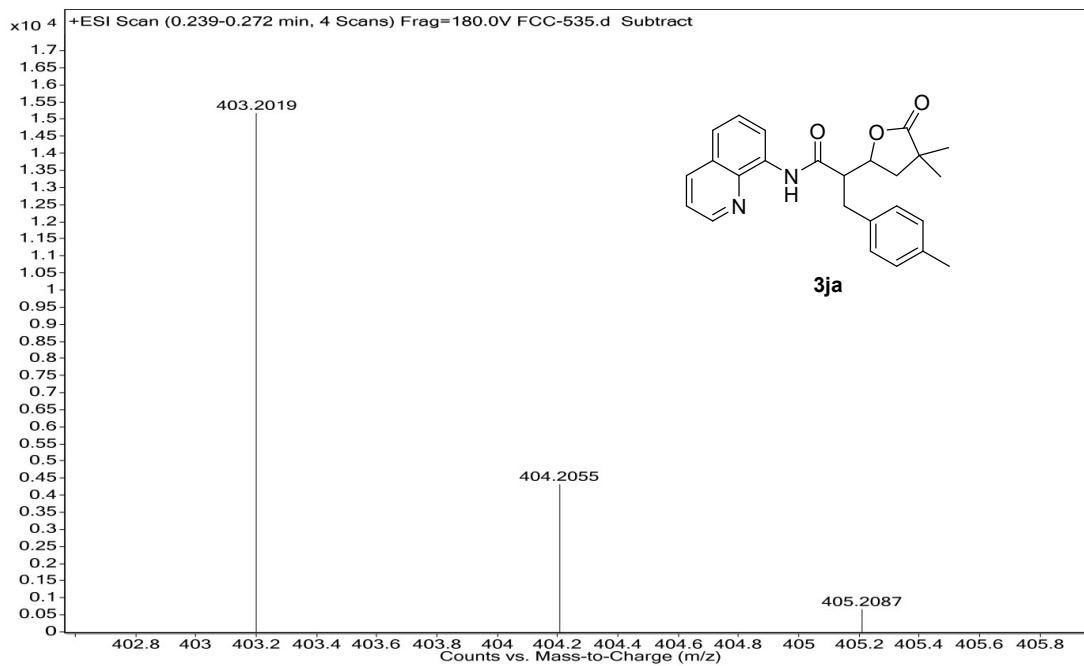

### <sup>1</sup>H NMR Spectra of **3ka**

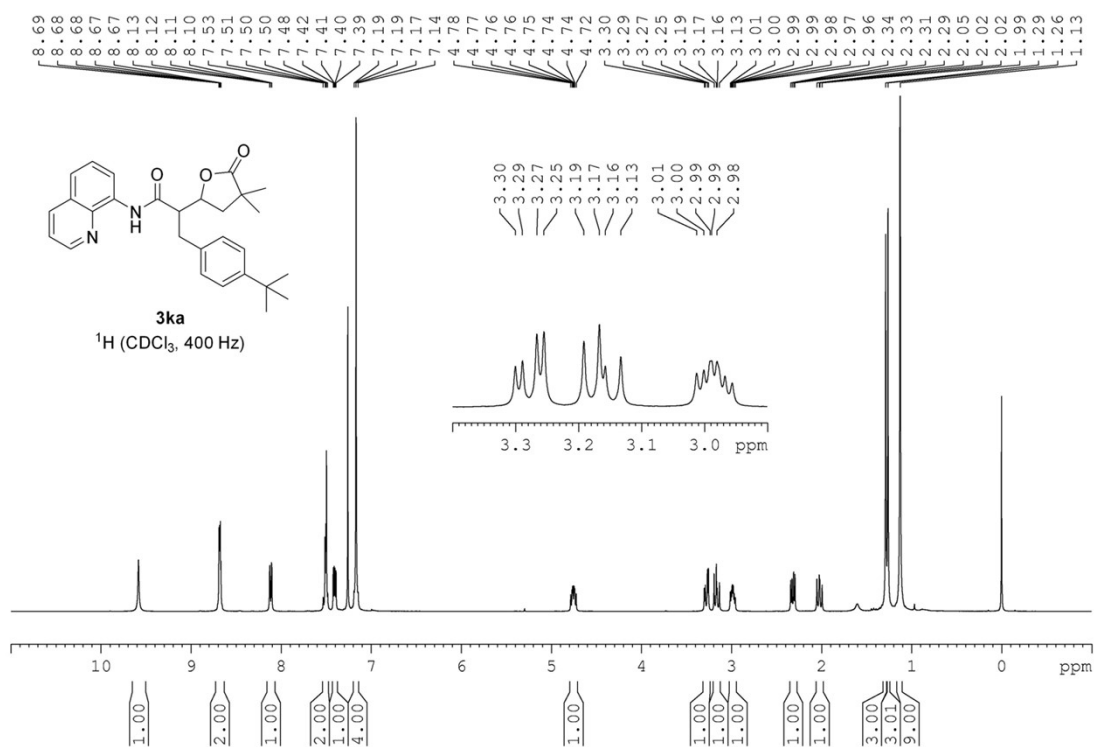

### <sup>13</sup>C NMR Spectra of **3ka**

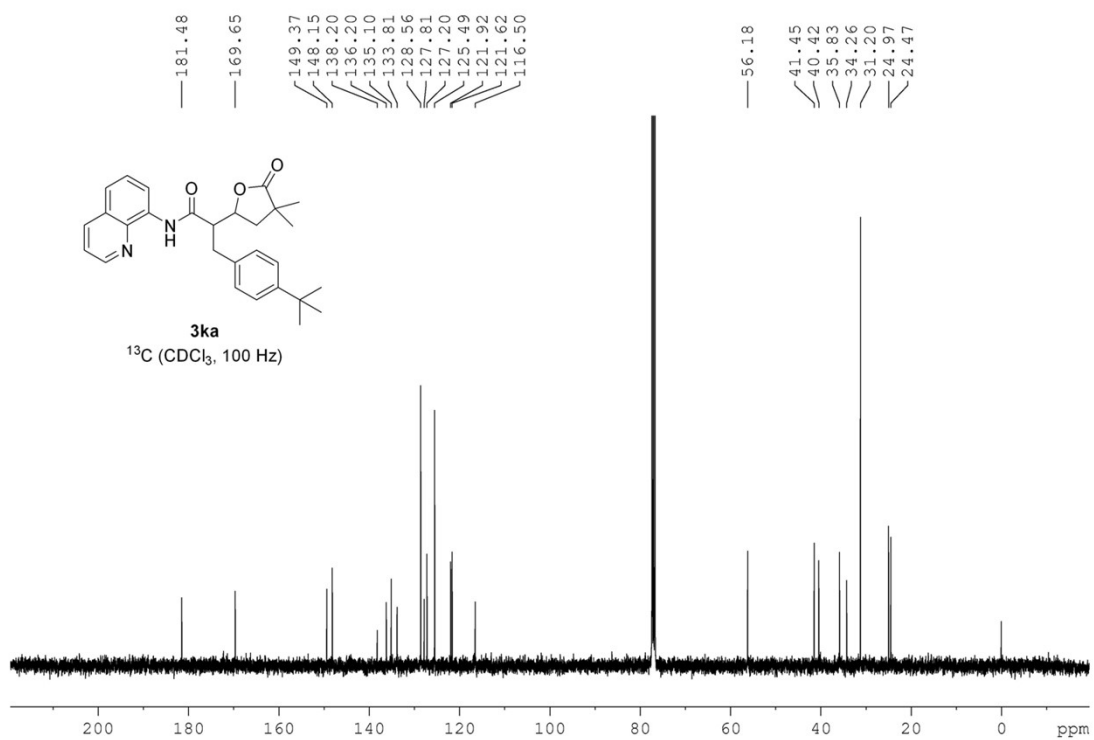

### HRMS Spectra of 3ka

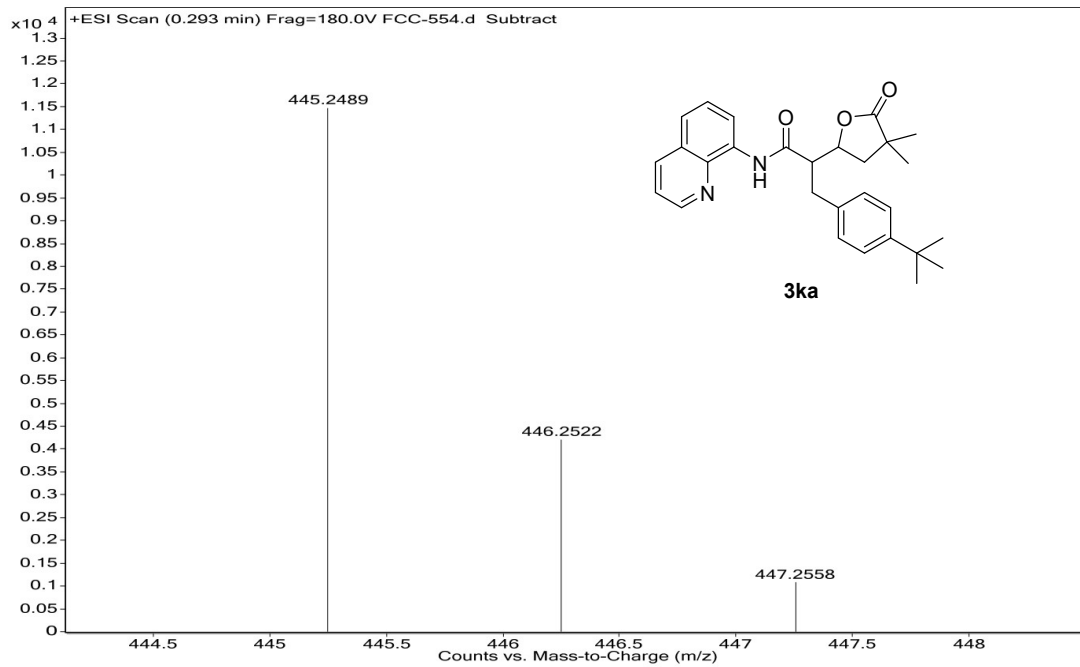

### <sup>1</sup>H NMR Spectra of 3la



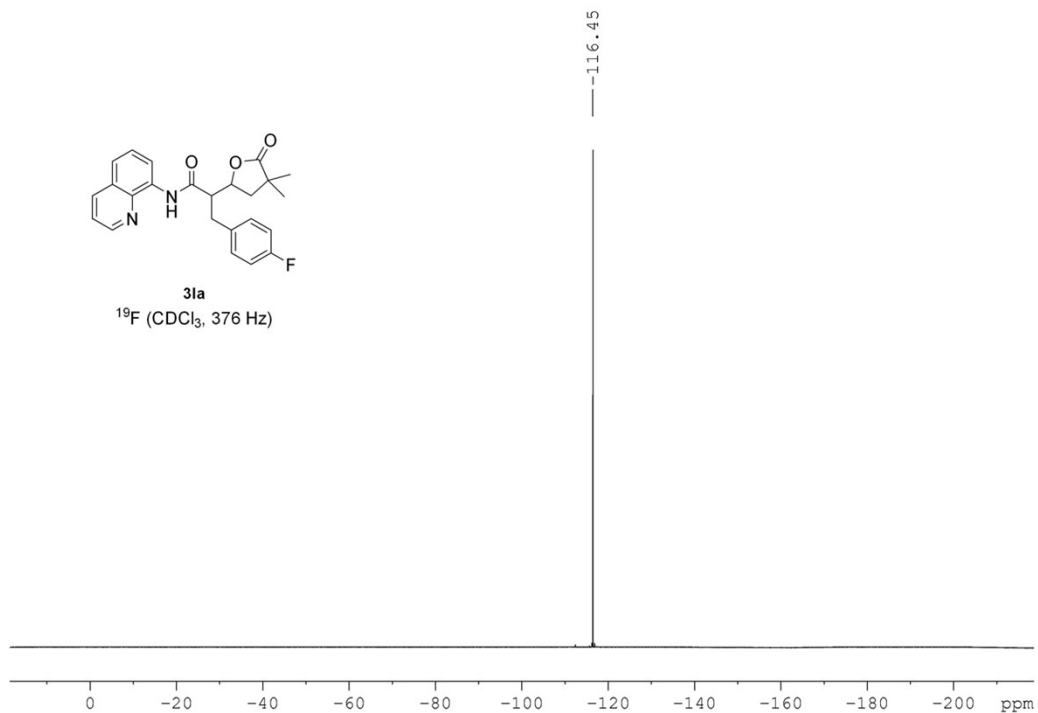

### HRMS Spectra of 3la

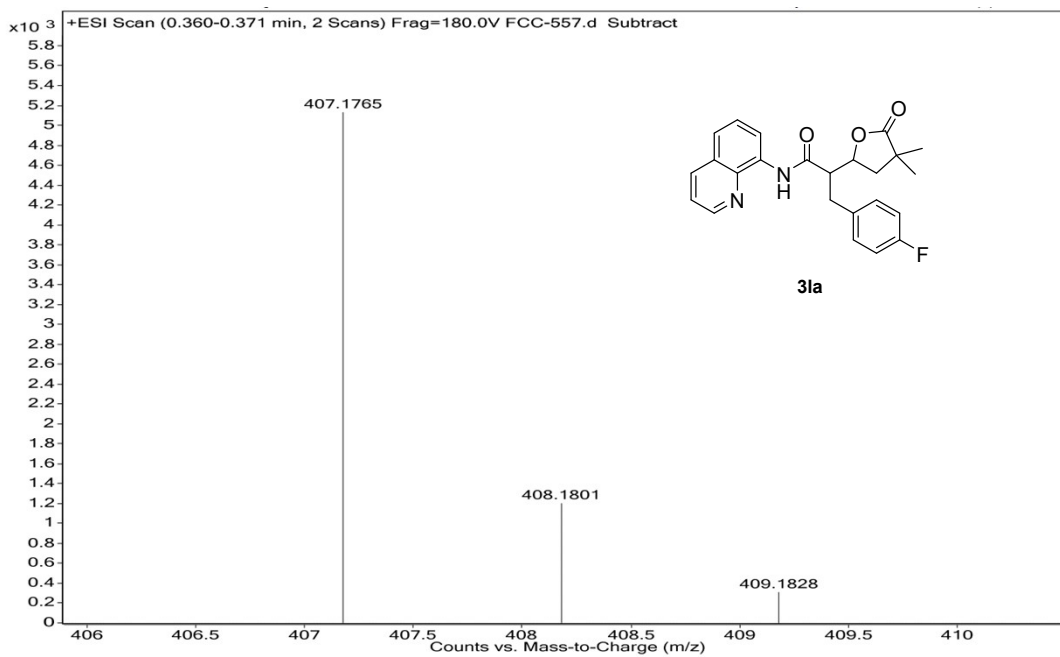

### $^1\text{H}$ NMR Spectra of 3ma

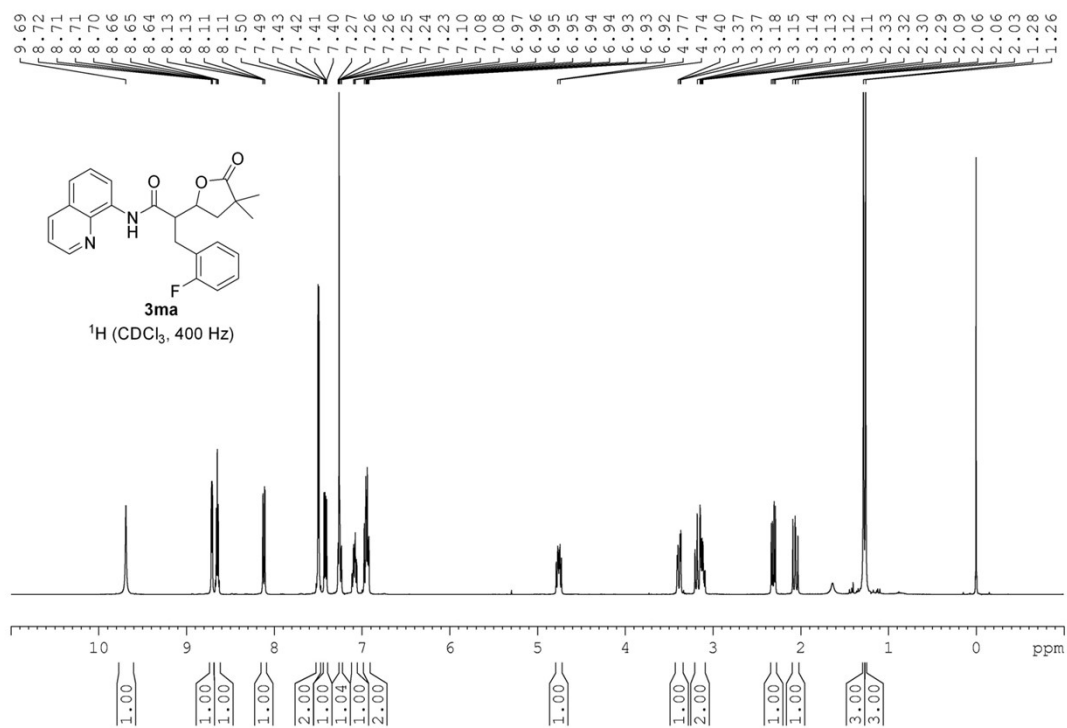

**<sup>13</sup>C NMR Spectra of 3ma**

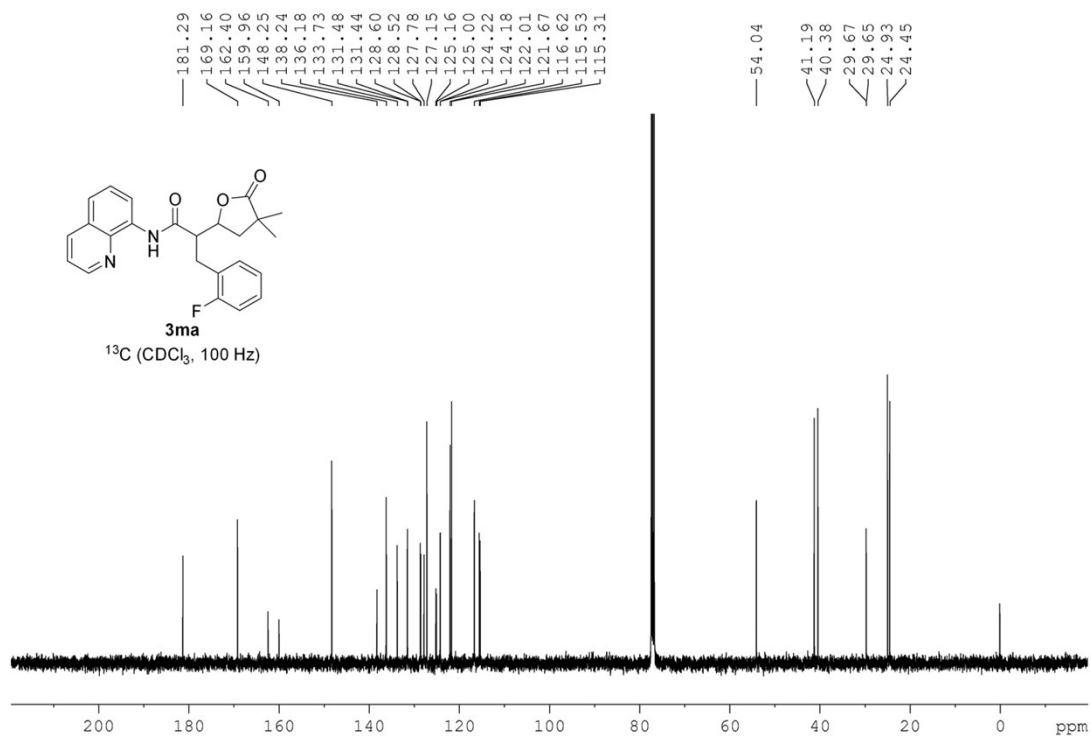

**<sup>19</sup>F NMR Spectra of 3ma**



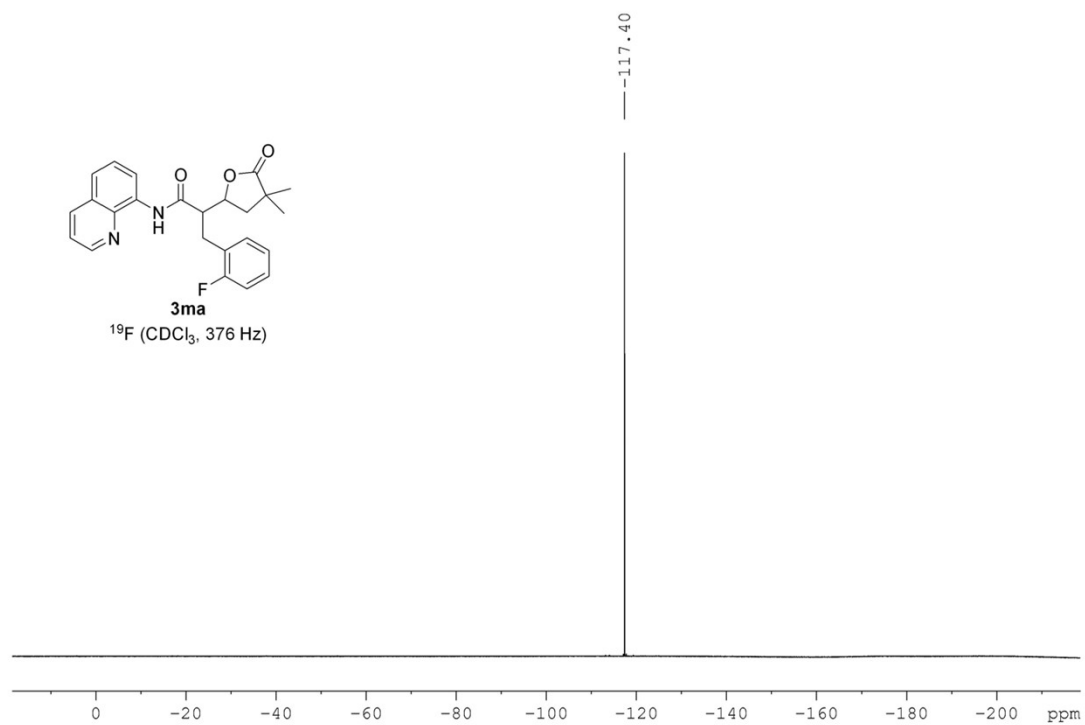

### HRMS Spectra of 3ma

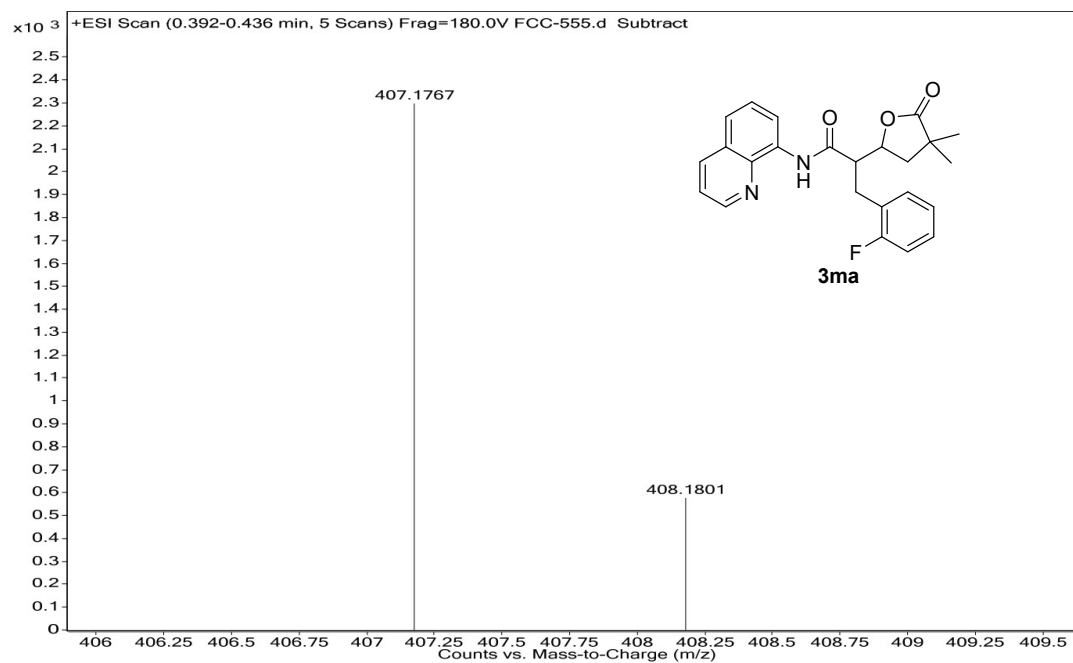

### $^1\text{H}$ NMR Spectra of 3na

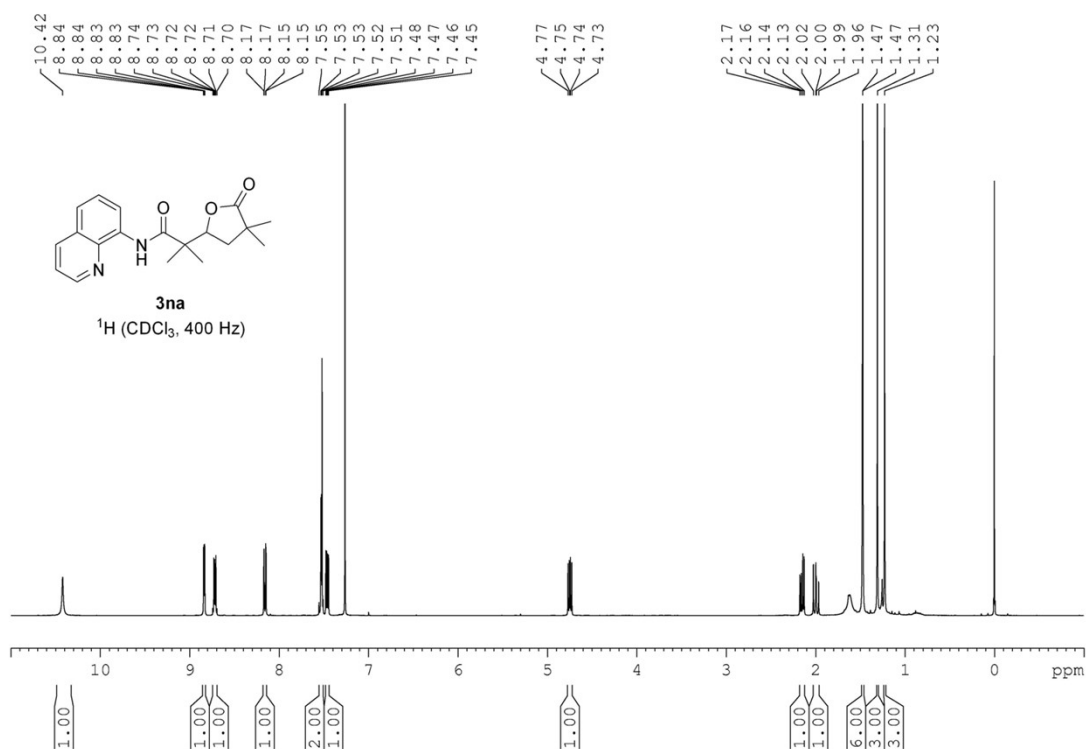

**<sup>13</sup>C NMR Spectra of 3na**

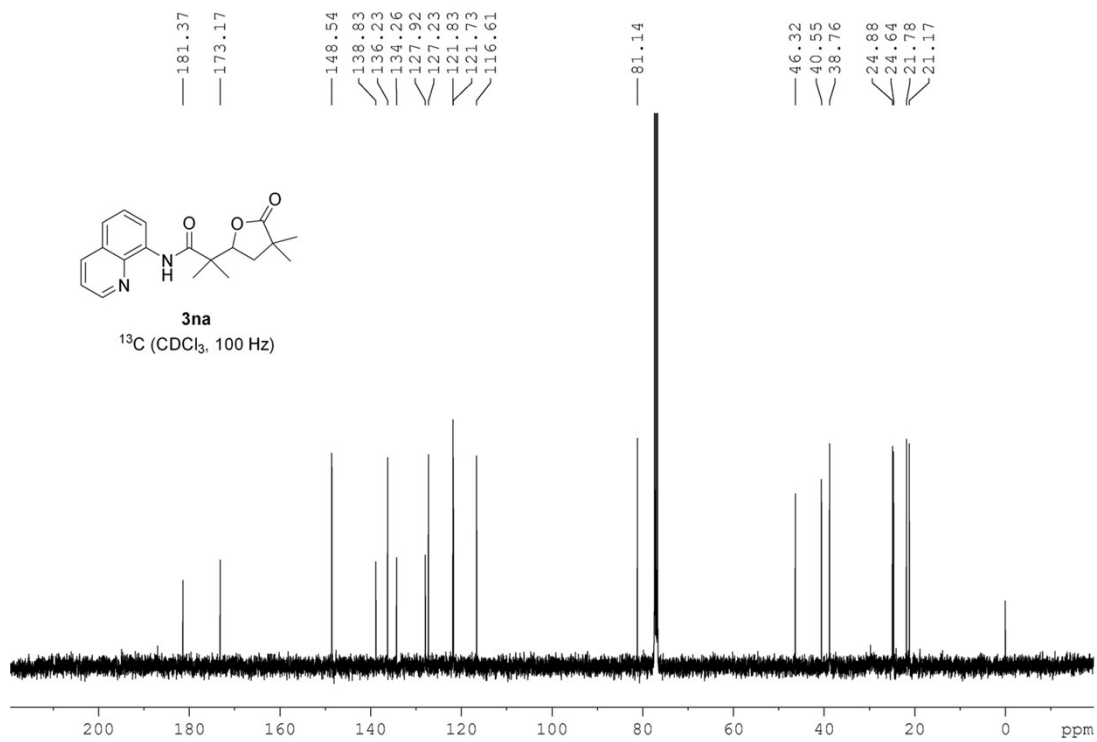

**HRMS Spectra of 3na**

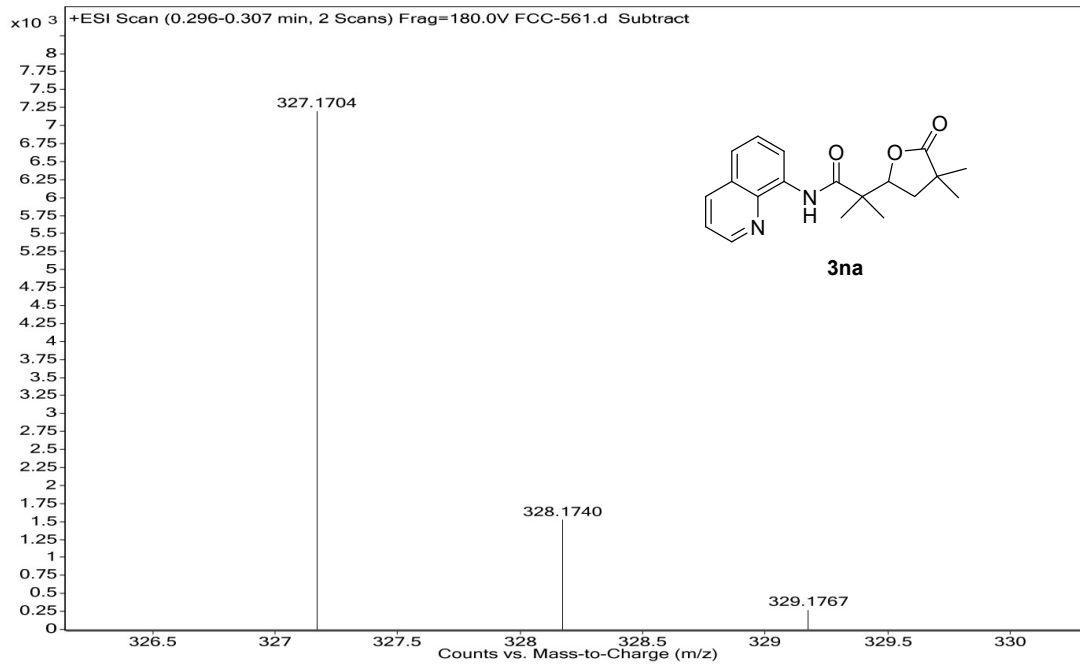

<sup>1</sup>H NMR Spectra of **30a**

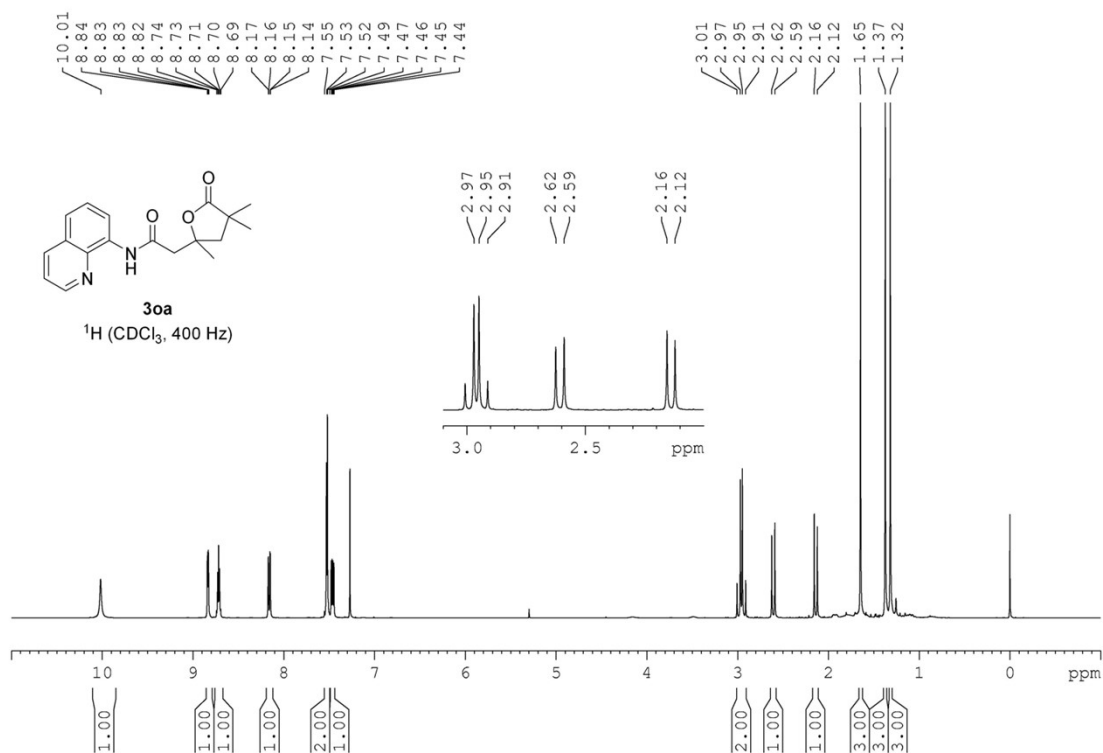

<sup>13</sup>C NMR Spectra of **30a**

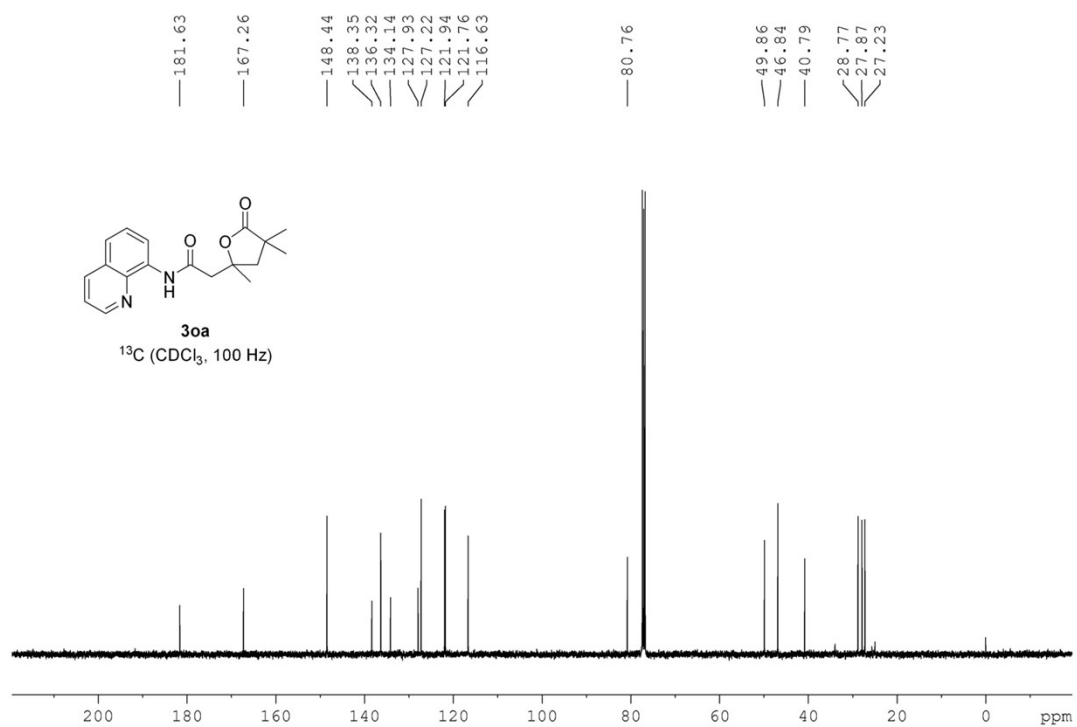

### HRMS Spectra of **30a**

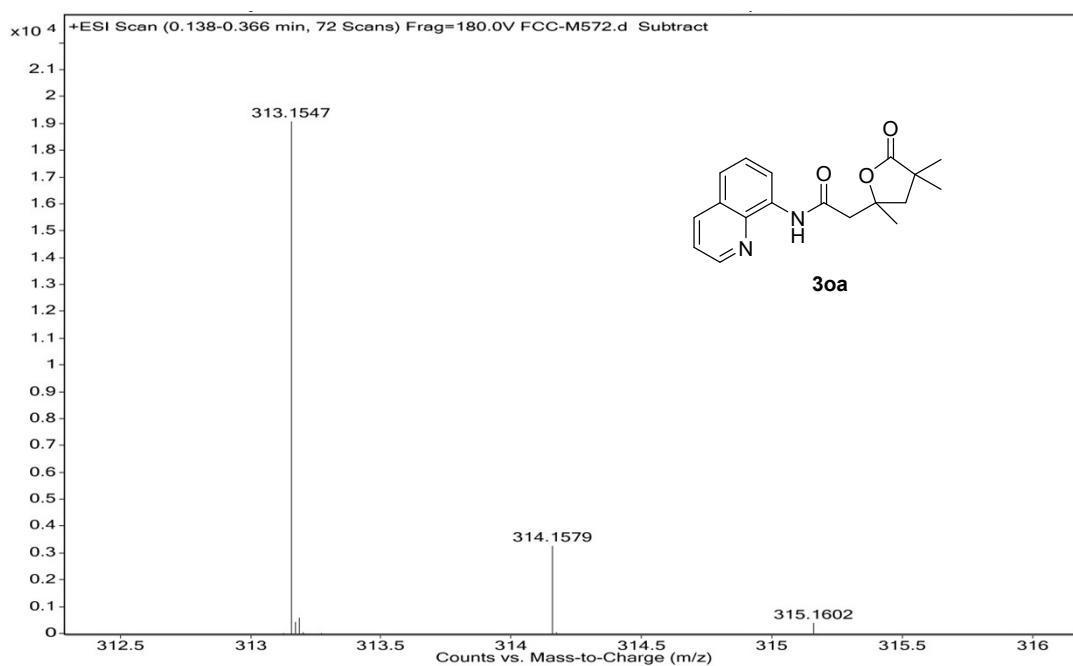

### <sup>1</sup>H NMR Spectra of **30a**

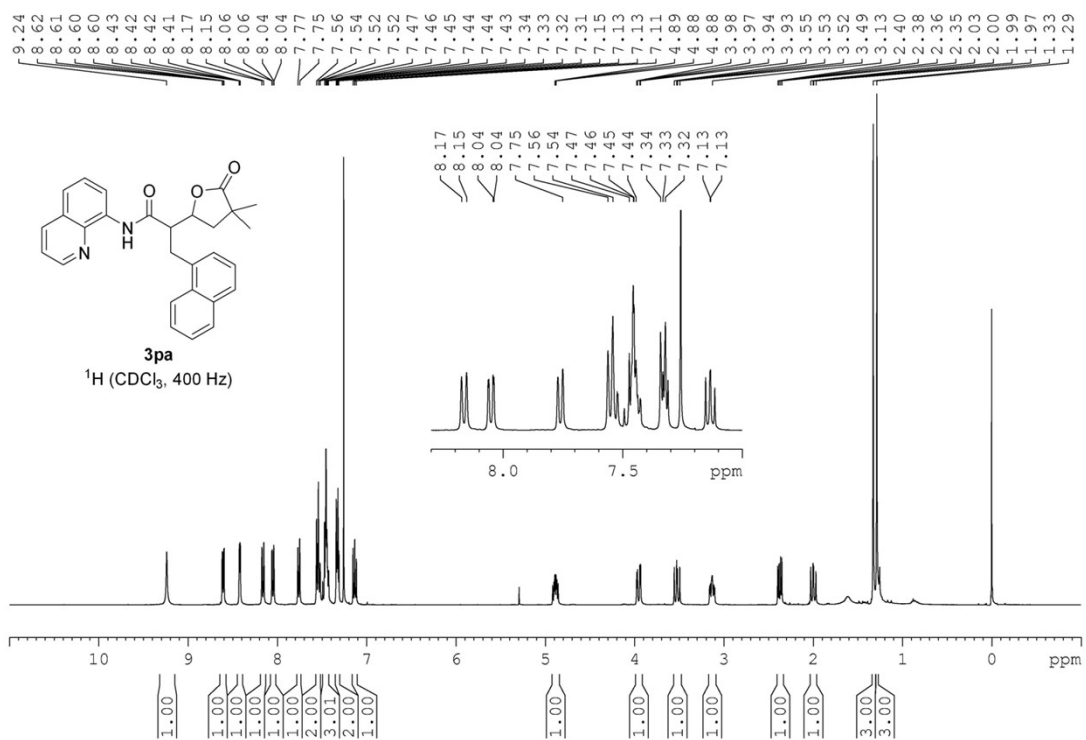

**<sup>13</sup>C NMR Spectra of 3pa**

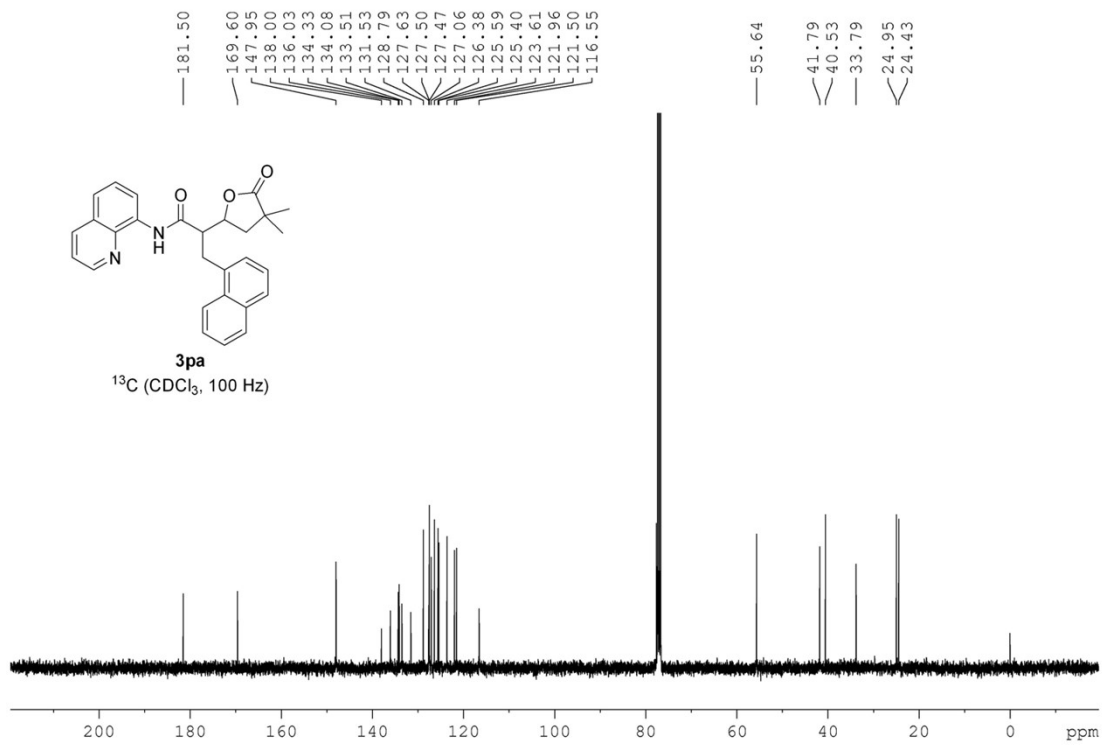

**HRMS Spectra of 3pa**

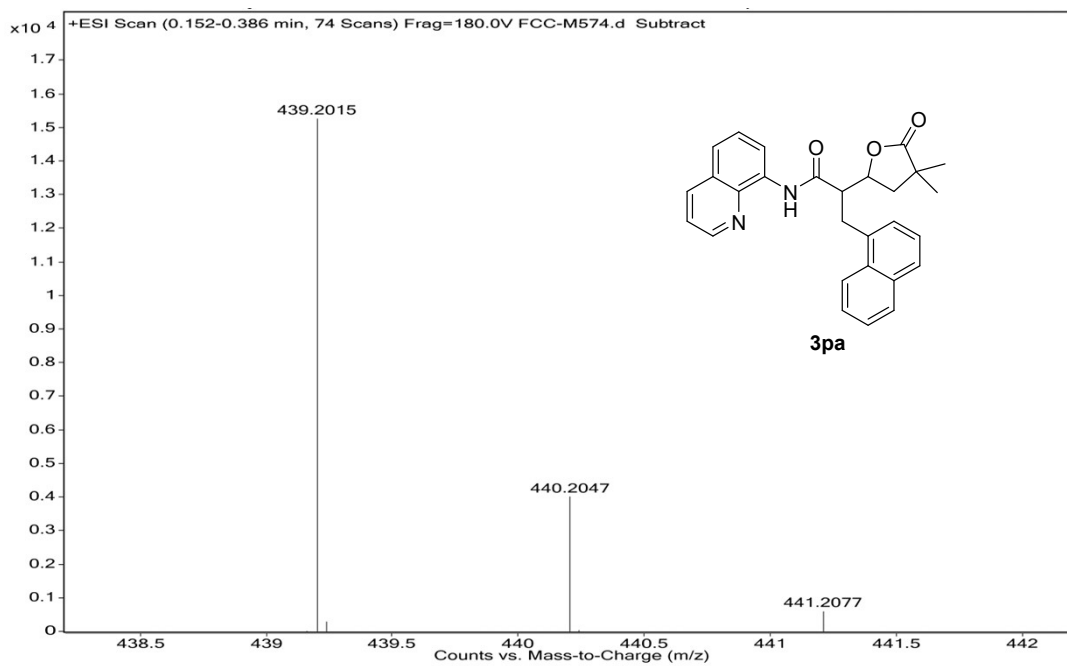

<sup>1</sup>H NMR Spectra of **3qa**

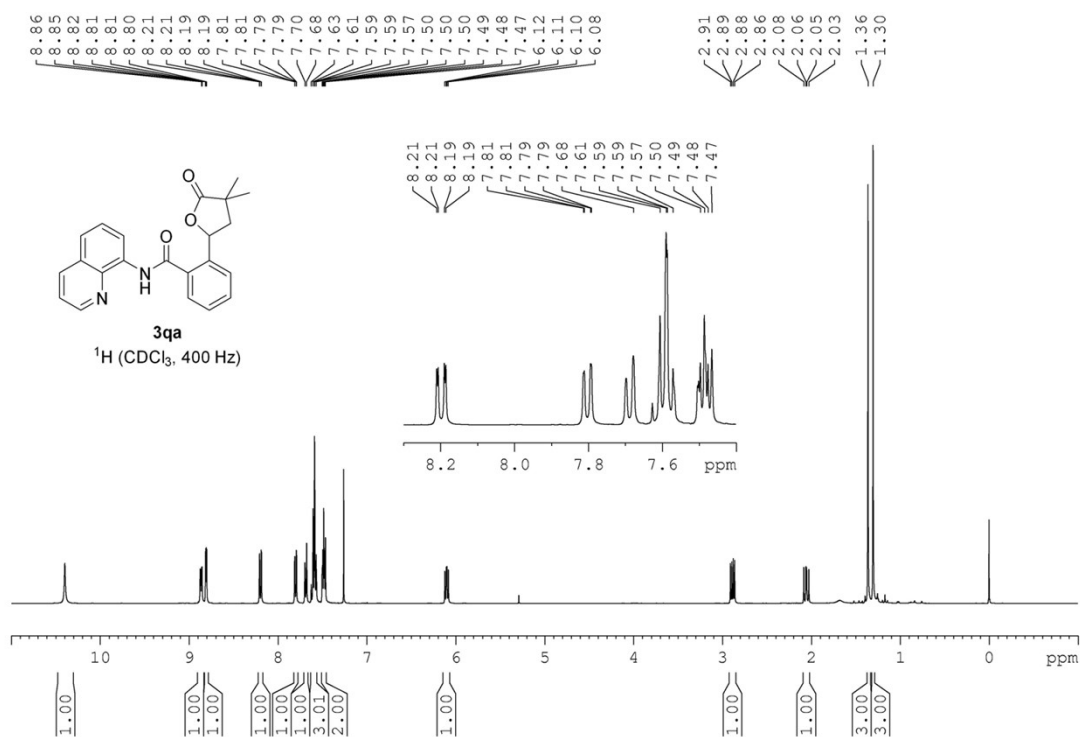

<sup>13</sup>C NMR Spectra of **3qa**

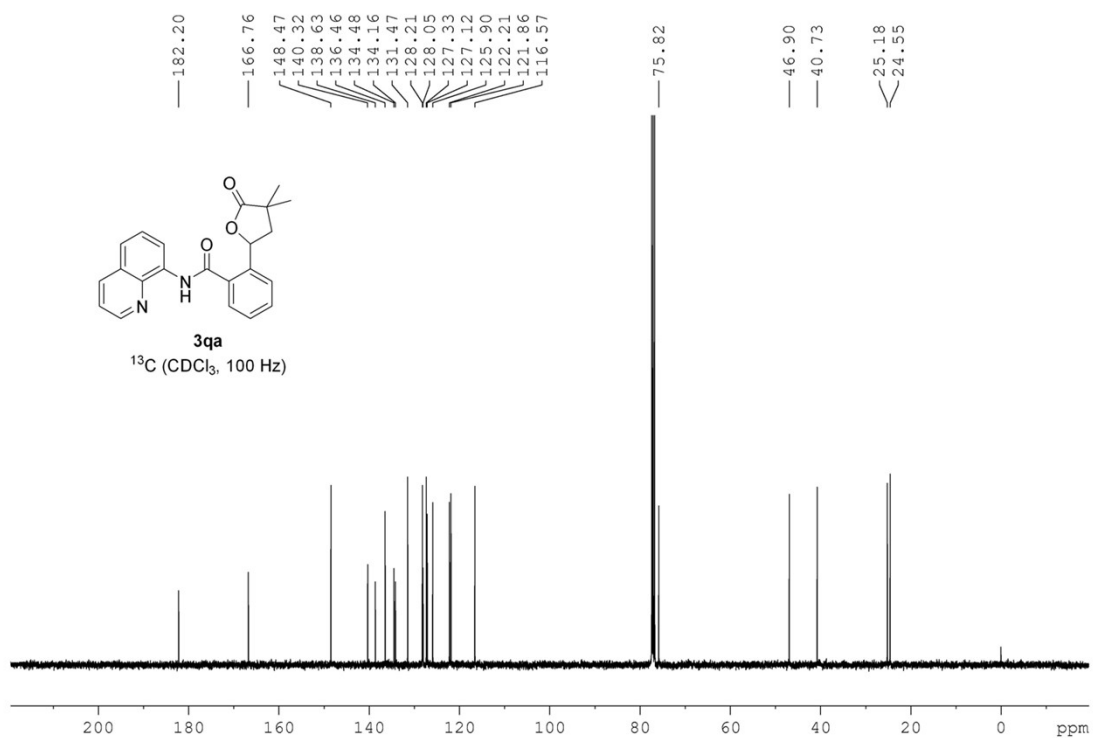

### HRMS Spectra of 3qa

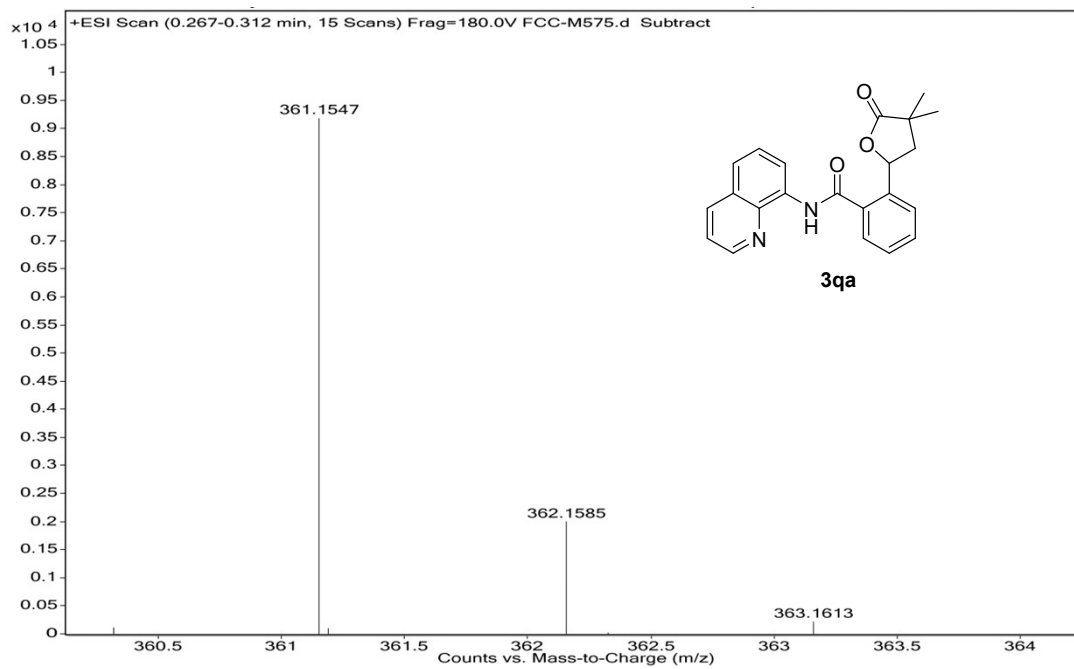

### <sup>1</sup>H NMR Spectra of 3ua





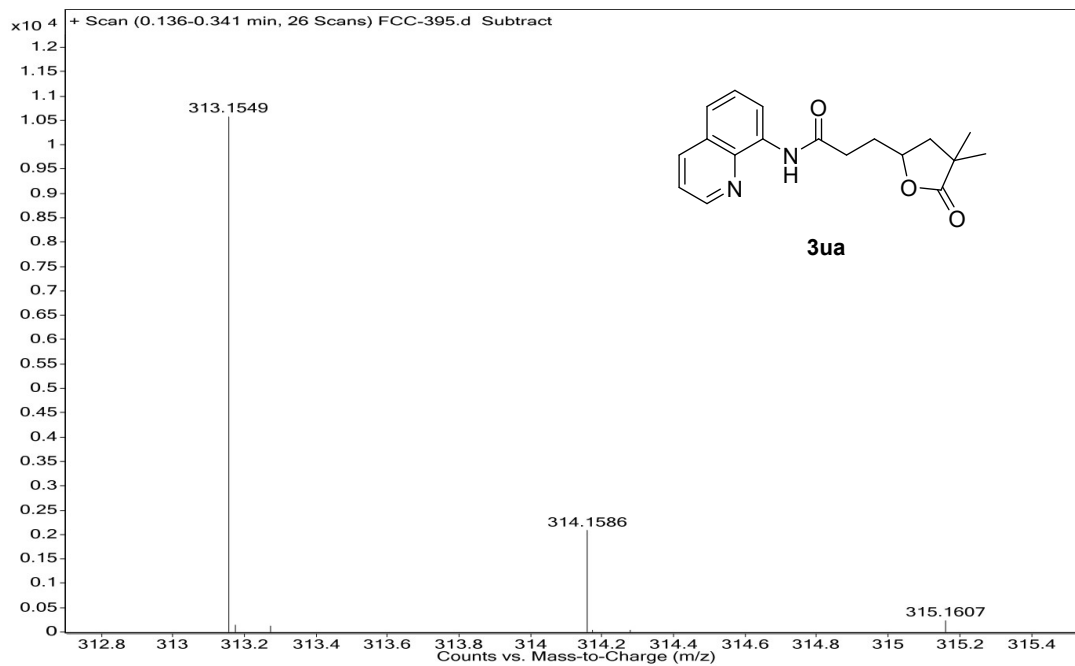

### <sup>1</sup>H NMR Spectra of 4

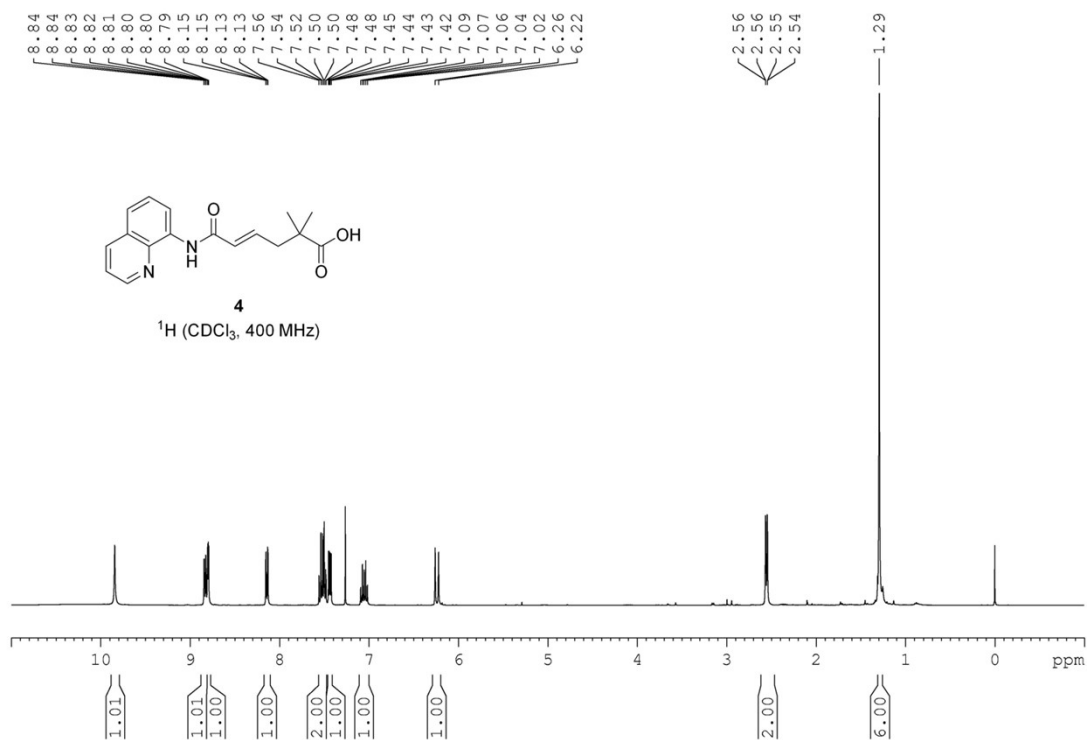

### <sup>13</sup>C NMR Spectra of 4

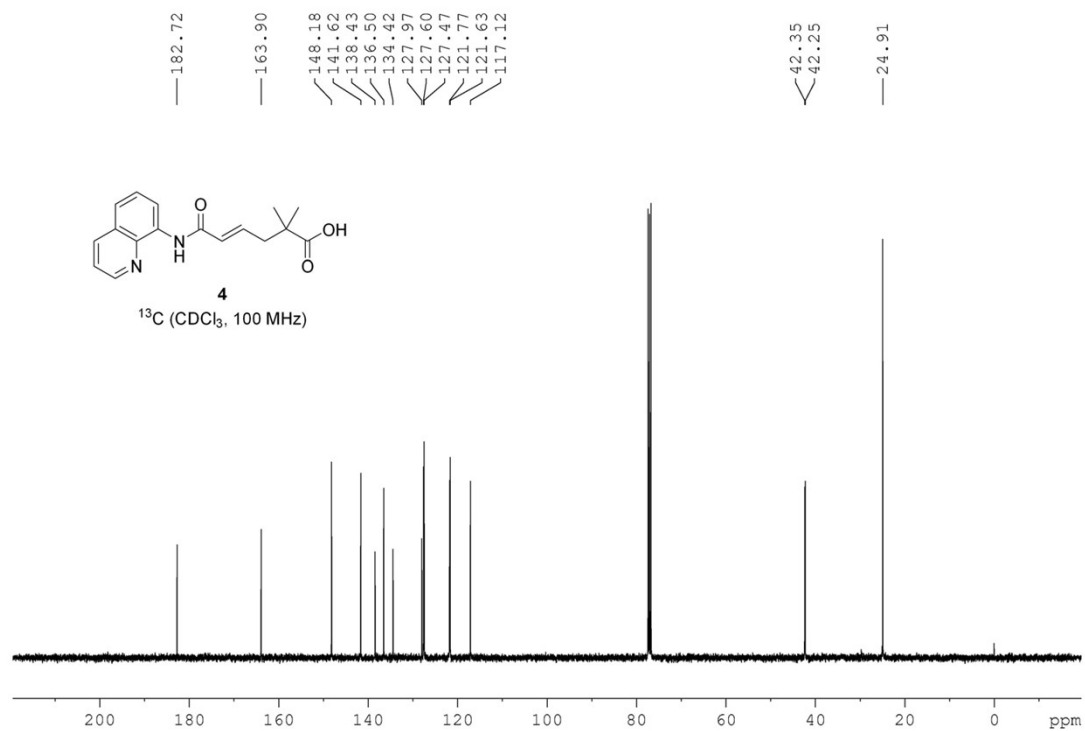

### HRMS Spectra of 4

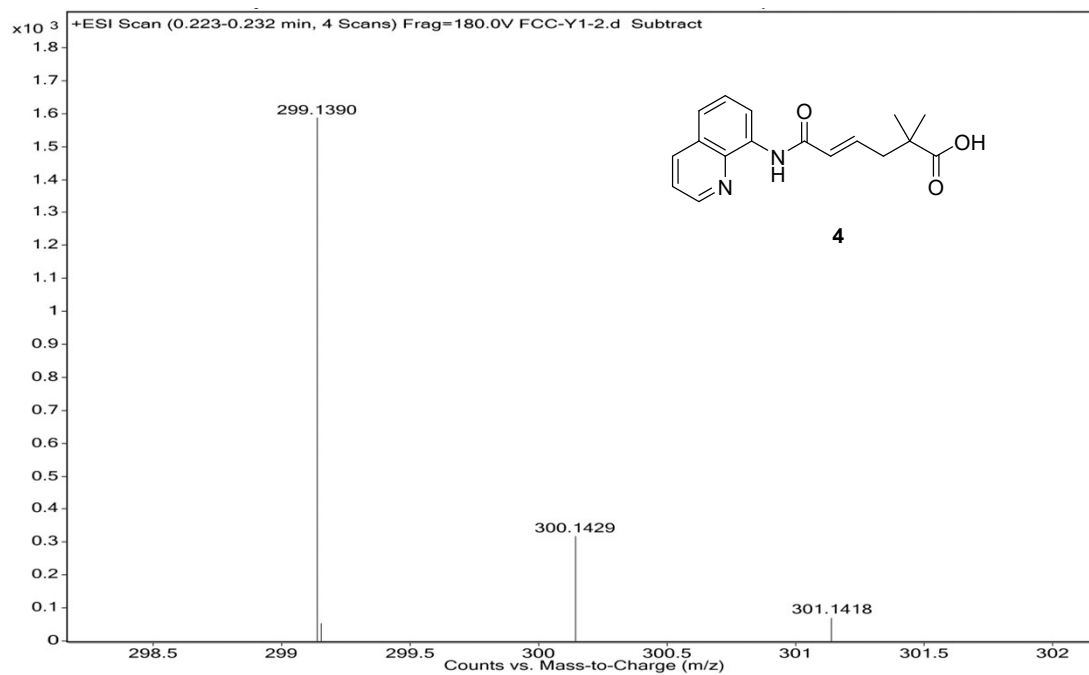

### $^1\text{H}$ NMR Spectra of 5

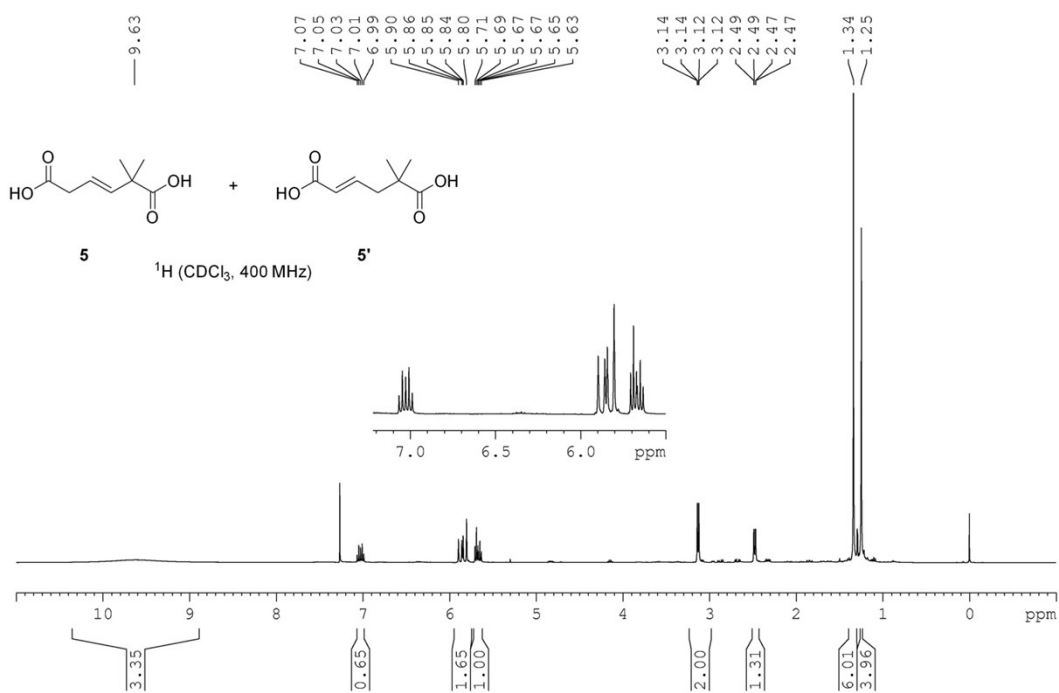

### <sup>13</sup>C NMR Spectra of 5

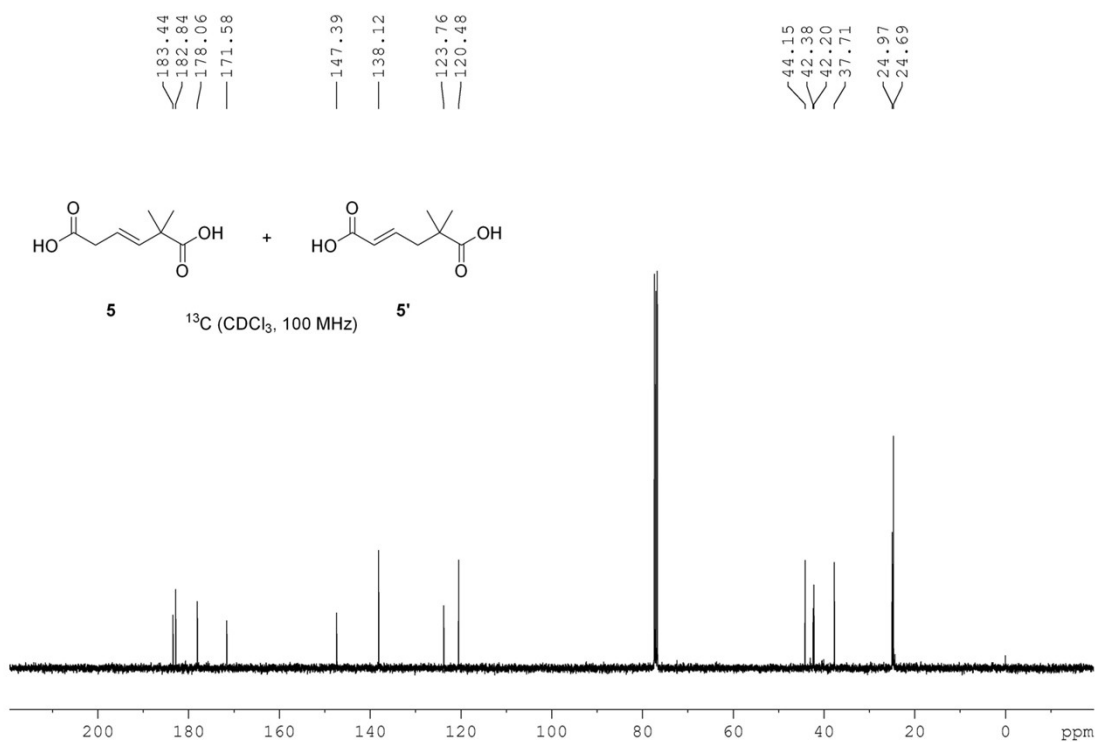

### HRMS Spectra of 5

8014#14 RT: 0.20 AV: 1 NL: 6.45E7  
T: FTMS - p ESI Full ms [50.0000-750.0000]

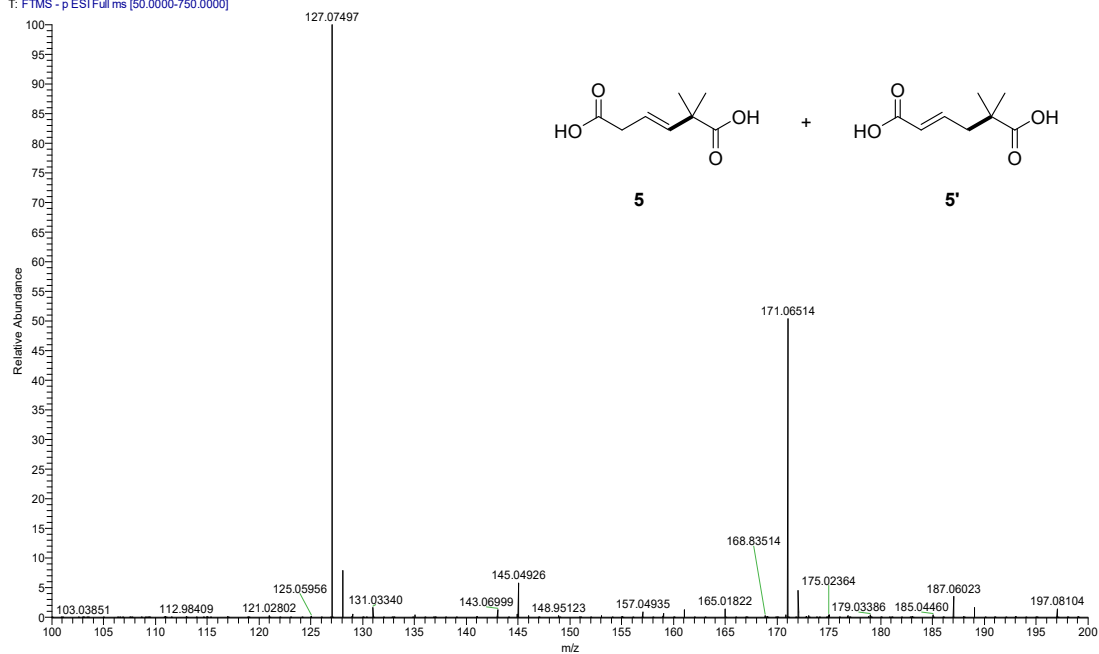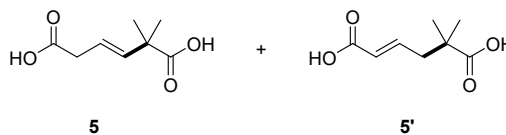

### <sup>1</sup>H NMR Spectra of 6

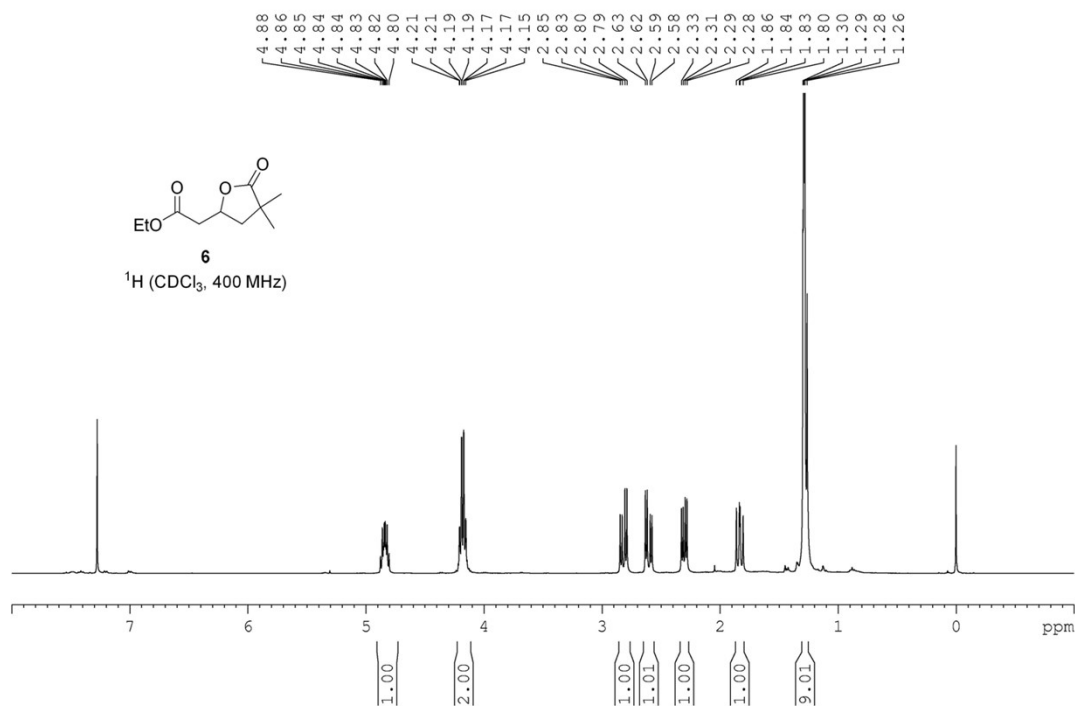

### <sup>13</sup>C NMR Spectra of 6

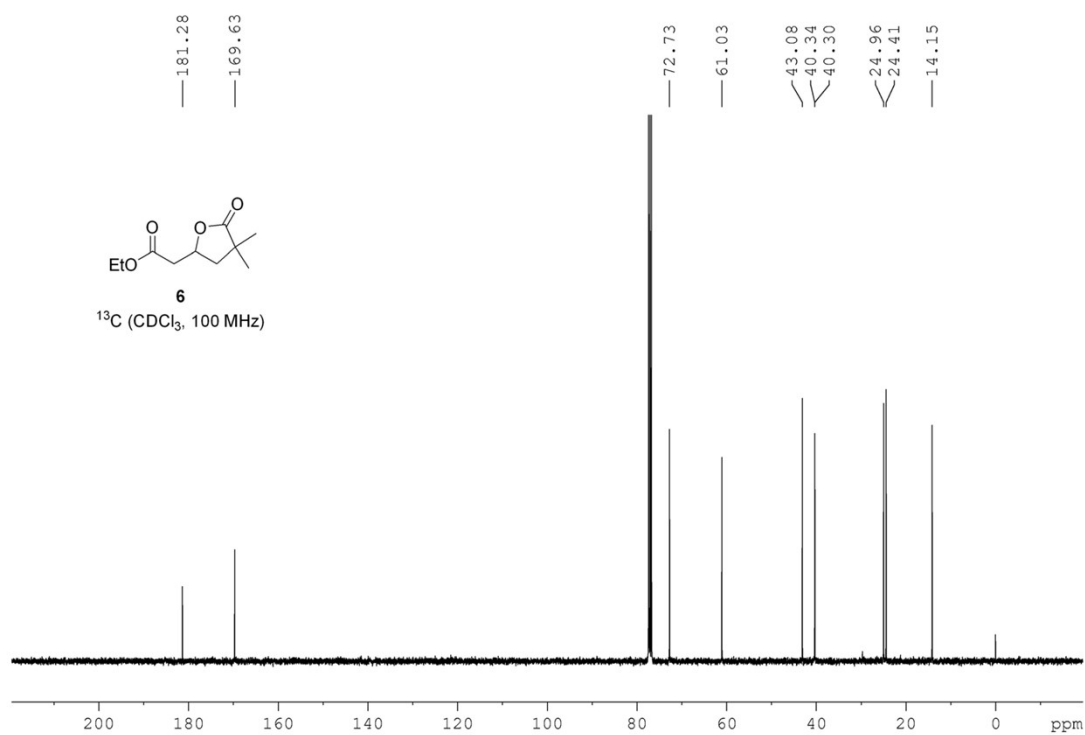

### HRMS Spectra of **6**

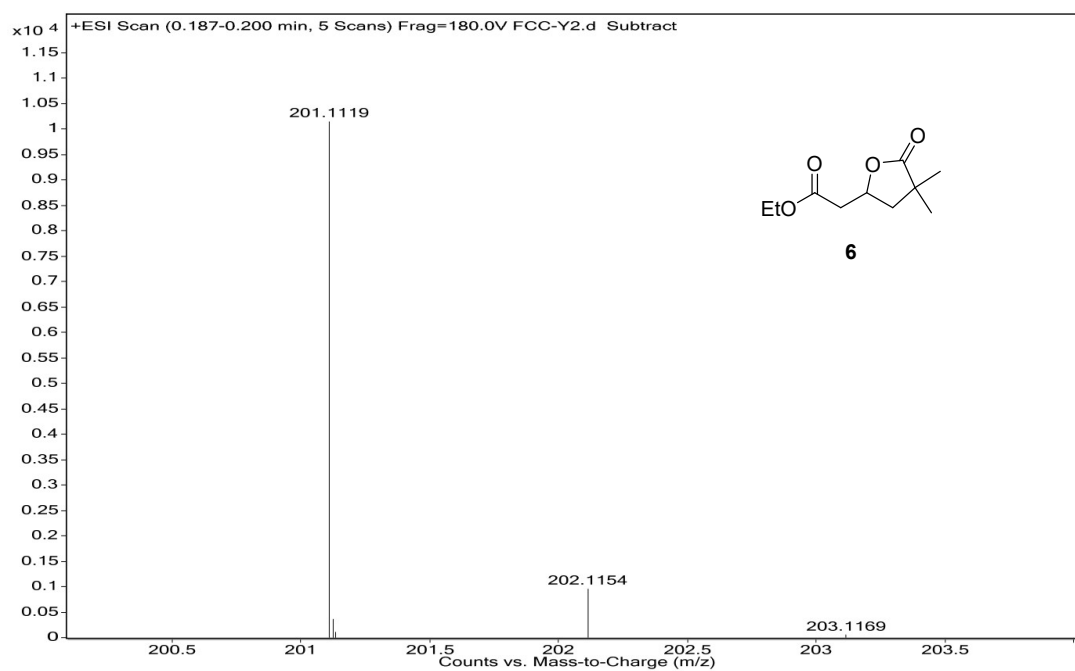

### $^1\text{H}$ NMR Spectra of **7**

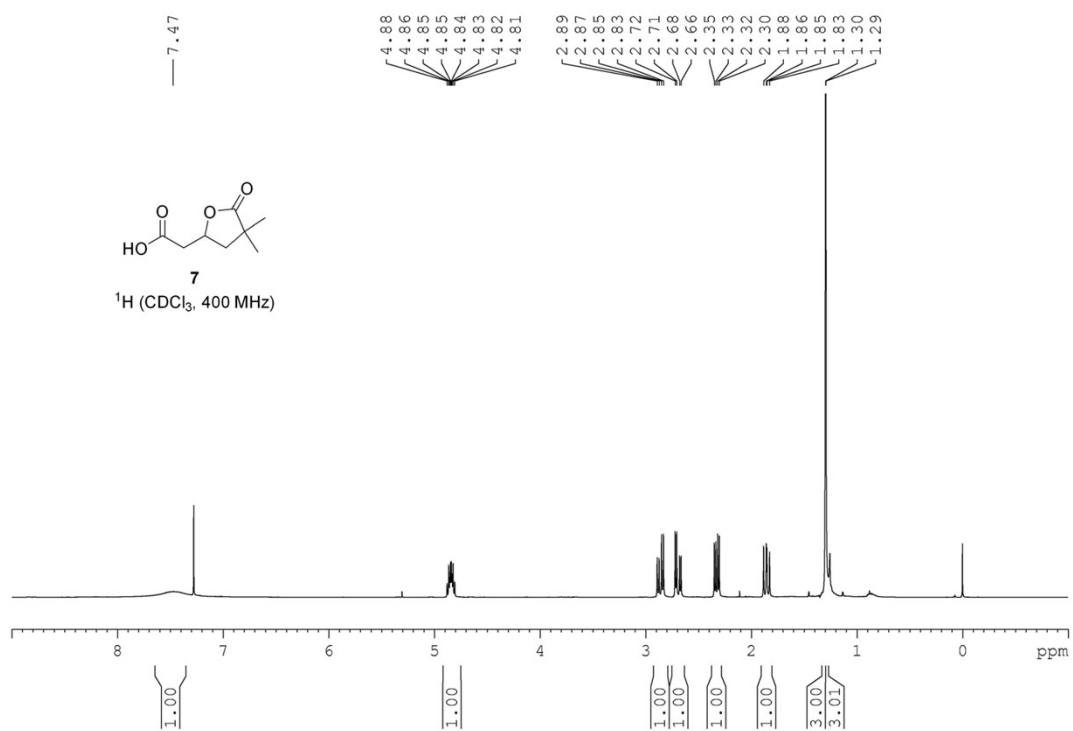

### $^{13}\text{C}$ NMR Spectra of 7

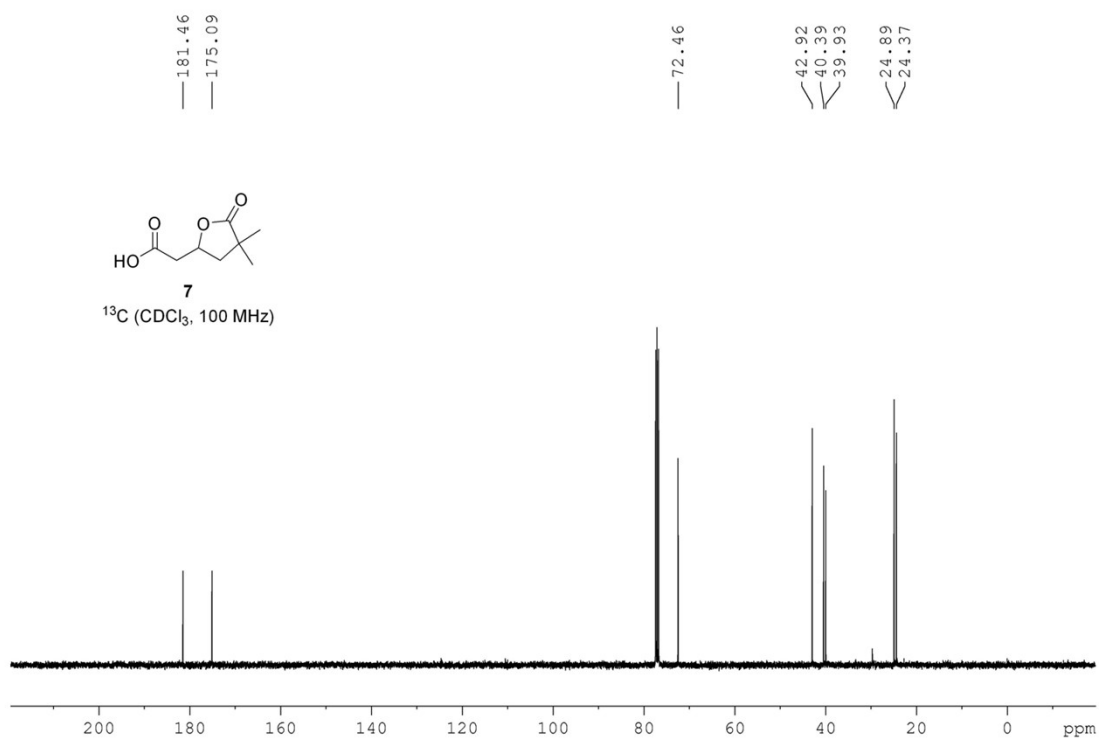

### HRMS Spectra of 7

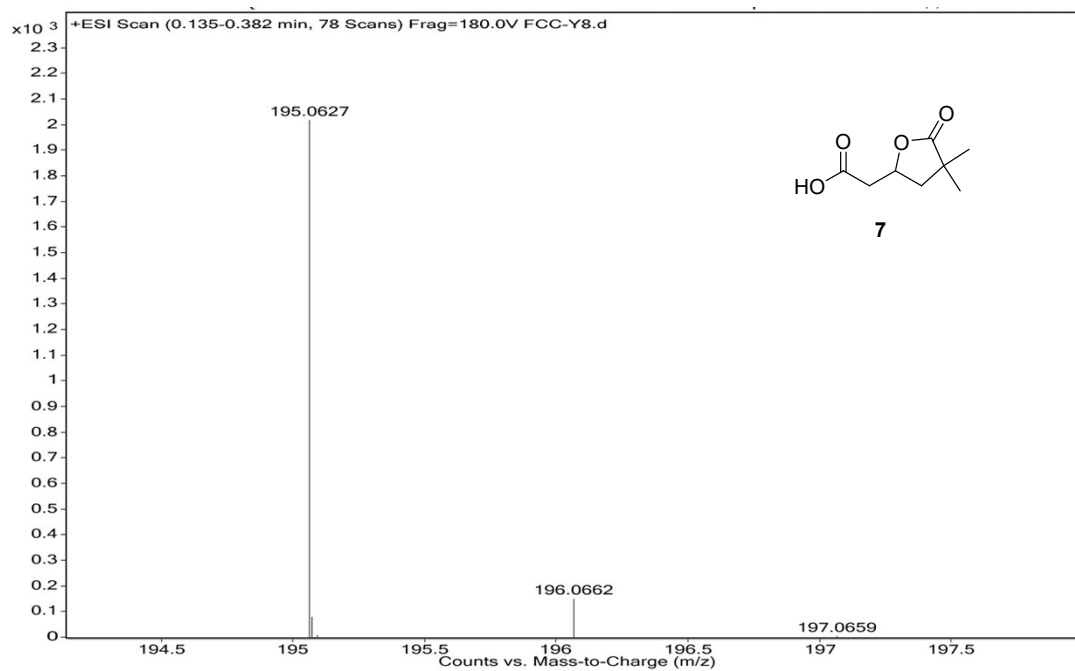

### <sup>1</sup>H NMR Spectra of **8**

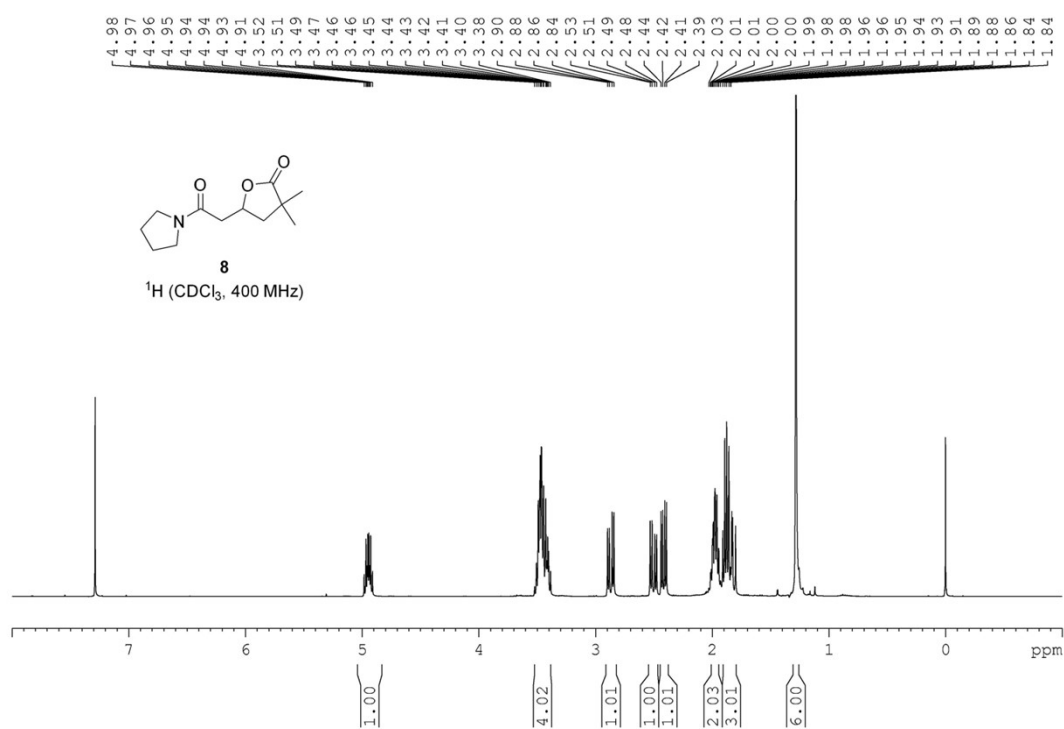

### <sup>13</sup>C NMR Spectra of **8**

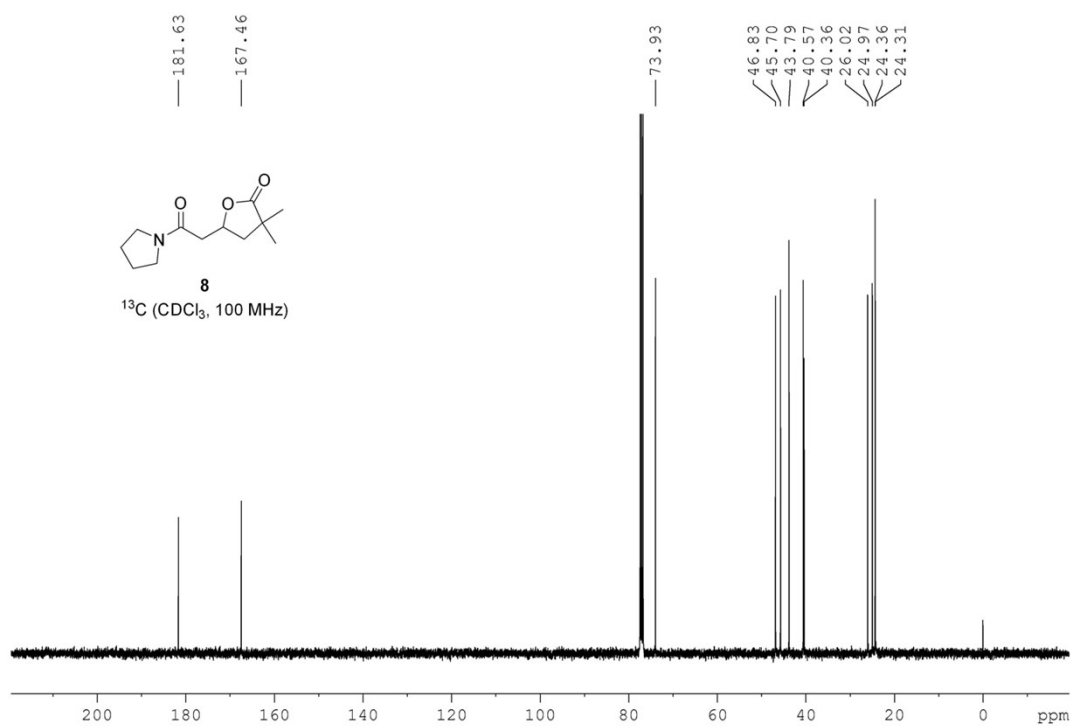

### HRMS Spectra of **8**

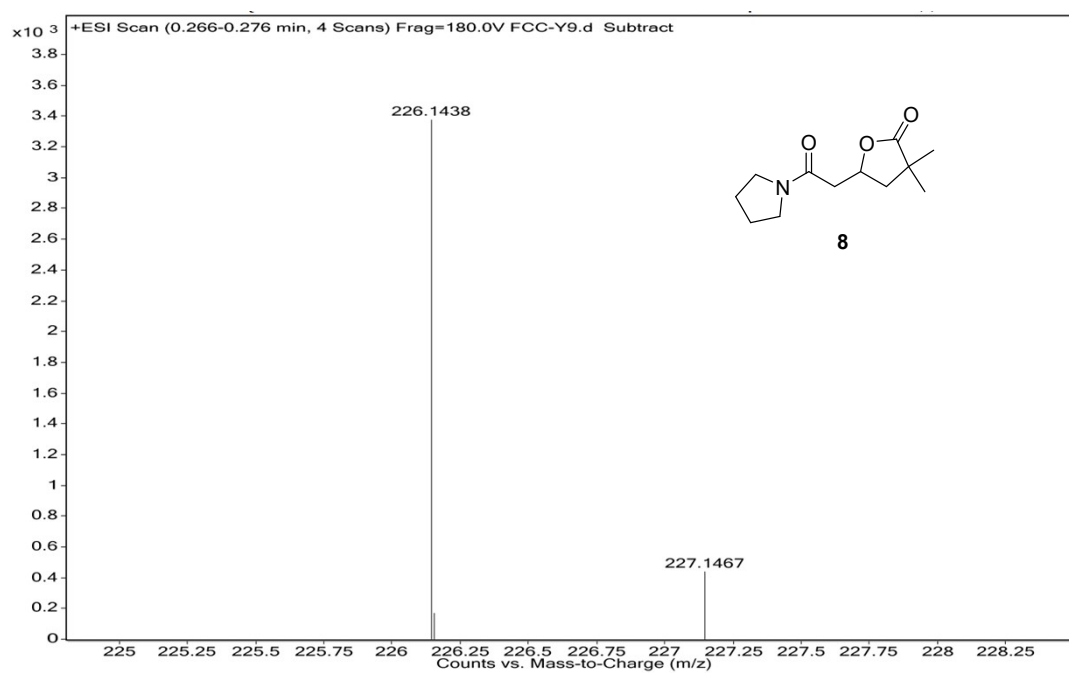

### $^1\text{H}$ NMR Spectra of **9**



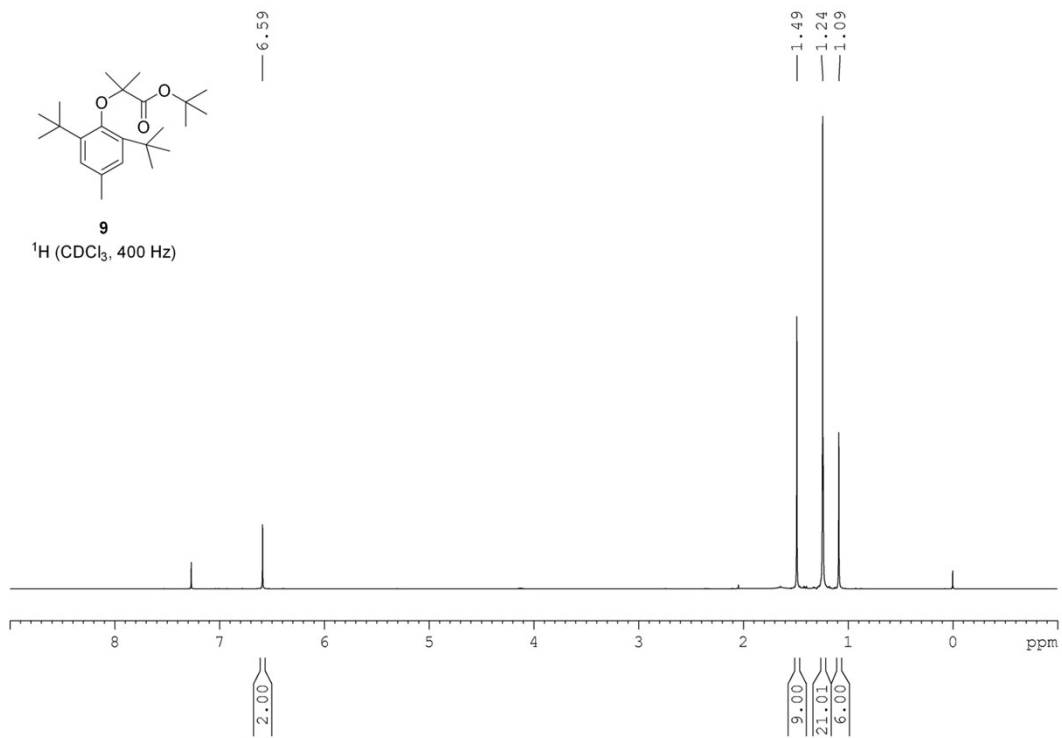

**<sup>13</sup>C NMR Spectra of 9**

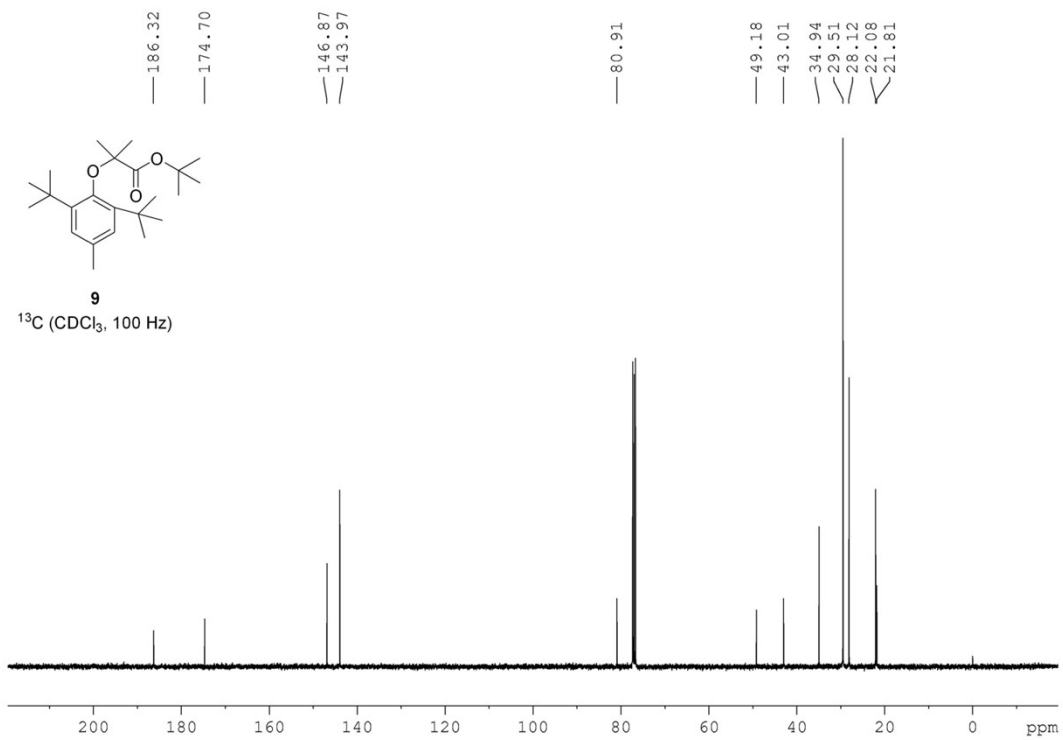

Supplement: d3qo00096f1.pdf [file d3qo00096f1.pdf]
